# Supplementary material for: Blood transcriptomics of drug-naïve sporadic Parkinson’s disease patients
Source: PubMed Central journal article supplement (PMC4625854; doi:10.1186/s12864-015-2058-3), 2015-10-28
Supplement: 12864_2015_2058_MOESM3_ESM.pdf [file 12864_2015_2058_MOESM3_ESM.pdf]

**Additional file 3. List of the 395 variables selected by Ranking-PCA to discriminate between PD patients and controls.** Order of variables, Affymetrix Probe Set IDs, gene symbols and names are indicated.

| Order | Affymetrix probe ID | Gene symbol  | Gene name                                                                                                                                        |
|-------|---------------------|--------------|--------------------------------------------------------------------------------------------------------------------------------------------------|
| 1     | 209715_at           | CBX5         | chromobox homolog 5 (HP1 alpha homolog, Drosophila)                                                                                              |
| 2     | 215750_at           | KIAA1659     | KIAA1659 protein                                                                                                                                 |
| 3     | 207339_s_at         | LTB          | lymphotoxin beta (TNF superfamily, member 3)                                                                                                     |
| 4     | 208763_s_at         | TSC22D3      | TSC22 domain family, member 3; GRAM domain containing 4                                                                                          |
| 4     | 208763_s_at         | GRAMD4       | TSC22 domain family, member 3; GRAM domain containing 4                                                                                          |
| 5     | 200921_s_at         | btg1         | B-cell translocation gene 1, anti-proliferative                                                                                                  |
| 6     | 214739_at           | LRCH3        | leucine-rich repeats and calponin homology (CH) domain containing 3 transcription factor 3 (E2A immunoglobulin enhancer binding factors E12/E47) |
| 7     | 209153_s_at         | tcf3         | transcription factor 3 (E2A immunoglobulin enhancer binding factors E12/E47)                                                                     |
| 8     | 208893_s_at         | dusp6        | dual specificity phosphatase 6                                                                                                                   |
| 9     | 221592_at           | TBC1D8       | TBC1 domain family, member 8 (with GRAM domain)                                                                                                  |
| 10    | 217492_s_at         | PTENP1       | phosphatase and tensin homolog; phosphatase and tensin homolog pseudogene 1                                                                      |
| 10    | 217492_s_at         | pten         | phosphatase and tensin homolog; phosphatase and tensin homolog pseudogene 1                                                                      |
| 11    | 217807_s_at         | GLTSCR2      | glioma tumor suppressor candidate region gene 2; glioma tumor suppressor candidate region gene 2 pseudogene                                      |
| 11    | 217807_s_at         | LOC440311    | glioma tumor suppressor candidate region gene 2; glioma tumor suppressor candidate region gene 2 pseudogene                                      |
| 12    | 210847_x_at         | TNFRSF25     | tumor necrosis factor receptor superfamily, member 25                                                                                            |
| 13    | 213963_s_at         | SAP30        | Sin3A-associated protein, 30kDa                                                                                                                  |
| 14    | 221649_s_at         | ppan         | peter pan homolog (Drosophila)                                                                                                                   |
| 15    | 203232_s_at         | ATXN1        | ataxin 1                                                                                                                                         |
| 16    | 214661_s_at         | NOPI4        | NOPI4 nucleolar protein homolog (yeast)                                                                                                          |
| 17    | 221923_s_at         | LOC399804    | nucleophosmin 1 (nucleolar phosphoprotein B23, numatrin) pseudogene 21; hypothetical LOC100131044; similar to nucleophosmin 1                    |
| 17    | 221923_s_at         | LOC100131044 | nucleophosmin 1 (nucleolar phosphoprotein B23, numatrin) pseudogene 21; hypothetical LOC100131044; similar to nucleophosmin 1                    |
| 17    | 221923_s_at         | LOC729686    | nucleophosmin 1 (nucleolar phosphoprotein B23, numatrin) pseudogene 21; hypothetical LOC100131044; similar to nucleophosmin 1                    |
| 17    | 221923_s_at         | Npm1         | nucleophosmin 1 (nucleolar phosphoprotein B23, numatrin) pseudogene 21; hypothetical LOC100131044; similar to nucleophosmin 1                    |
| 17    | 221923_s_at         | LOC729342    | nucleophosmin 1 (nucleolar phosphoprotein B23, numatrin) pseudogene 21; hypothetical LOC100131044; similar to nucleophosmin 1                    |
| 17    | 221923_s_at         | NPM1P21      | nucleophosmin 1 (nucleolar phosphoprotein B23, numatrin) pseudogene 21; hypothetical LOC100131044; similar to nucleophosmin 1                    |
| 17    | 221923_s_at         | LOC440577    | nucleophosmin 1 (nucleolar phosphoprotein B23, numatrin) pseudogene 21; hypothetical LOC100131044; similar to nucleophosmin 1                    |
| 18    | 210607_at           | FLT3LG       | fms-related tyrosine kinase 3 ligand                                                                                                             |
| 19    | 202436_s_at         | CYP1B1       | cytochrome P450, family 1, subfamily B, polypeptide 1                                                                                            |
| 20    | 213614_x_at         | EEF1A1       | eukaryotic translation elongation factor 1 alpha-like 7; eukaryotic translation elongation factor 1 alpha-like 3                                 |
| 20    | 213614_x_at         | EEF1A1P9     | eukaryotic translation elongation factor 1 alpha-like 7; eukaryotic translation elongation factor 1 alpha-like 3                                 |
| 20    | 213614_x_at         | EEF1A1P5     | eukaryotic translation elongation factor 1 alpha-like 7; eukaryotic translation elongation factor 1 alpha-like 3                                 |
| 20    | 213614_x_at         | EEF1A1P24    | eukaryotic translation elongation factor 1 alpha-like 7; eukaryotic                                                                              |

|    |             |           |                                                                                                                  |
|----|-------------|-----------|------------------------------------------------------------------------------------------------------------------|
|    |             |           | translation elongation factor 1 alpha-like 3                                                                     |
| 21 | 201085_s_at | SON       | SON DNA binding protein                                                                                          |
| 22 | 222348_at   | MAST4     | microtubule associated serine/threonine kinase family member 4                                                   |
| 23 | 31637_s_at  | thrA      | thyroid hormone receptor, alpha (erythroblastic leukemia viral (v-erb-a) oncogene homolog, avian)                |
| 24 | 205530_at   | Etfdh     | electron-transferring-flavoprotein dehydrogenase                                                                 |
| 25 | 213817_at   | irak3     | interleukin-1 receptor-associated kinase 3                                                                       |
| 26 | 37590_g_at  | ZNF710    | zinc finger protein 710                                                                                          |
| 27 | 221963_x_at | NA        | not yet annotated                                                                                                |
| 28 | 217494_s_at | PTENP1    | phosphatase and tensin homolog; phosphatase and tensin homolog pseudogene 1                                      |
| 28 | 217494_s_at | pten      | phosphatase and tensin homolog; phosphatase and tensin homolog pseudogene 1                                      |
| 29 | 206413_s_at | TCL6      | T-cell leukemia/lymphoma 6                                                                                       |
| 30 | 211282_x_at | TNFRSF25  | tumor necrosis factor receptor superfamily, member 25                                                            |
| 31 | 219025_at   | CD248     | CD248 molecule, endosialin                                                                                       |
| 32 | 217992_s_at | Efh2      | EF-hand domain family, member D2                                                                                 |
| 33 | 205594_at   | ZNF652    | zinc finger protein 652                                                                                          |
| 34 | 203658_at   | SLC25A20  | solute carrier family 25 (carnitine/acylcarnitine translocase), member 20                                        |
| 35 | 222337_at   | OSBPL9    | oxysterol binding protein-like 9                                                                                 |
| 36 | 217647_at   | dhodh     | dihydroorotate dehydrogenase                                                                                     |
| 37 | 219671_at   | HPCAL4    | hippocalcin like 4                                                                                               |
| 38 | 214394_x_at | EEF1D     | eukaryotic translation elongation factor 1 delta (guanine nucleotide exchange protein)                           |
| 39 | 222091_at   | HPCAL4    | hippocalcin like 4                                                                                               |
| 40 | 214180_at   | MAN1C1    | mannosidase, alpha, class 1C, member 1                                                                           |
| 41 | 212831_at   | MEGF9     | multiple EGF-like-domains 9                                                                                      |
| 42 | 202388_at   | RGS2      | regulator of G-protein signaling 2, 24kDa                                                                        |
| 43 | 212794_s_at | KIAA1033  | KIAA1033                                                                                                         |
| 44 | 41113_at    | ZNF500    | zinc finger protein 500                                                                                          |
| 45 | 214500_at   | H2AFY     | H2A histone family, member Y                                                                                     |
| 46 | 207078_at   | MED6      | mediator complex subunit 6                                                                                       |
| 47 | 220609_at   | LOC202181 | hypothetical protein LOC202181                                                                                   |
| 48 | 213428_s_at | COL6A1    | collagen, type VI, alpha 1                                                                                       |
| 49 | 212562_s_at | CTSZ      | cathepsin Z                                                                                                      |
| 50 | 219574_at   | MARCH1    | membrane-associated ring finger (C3HC4) 1                                                                        |
| 51 | 220085_at   | Hells     | helicase, lymphoid-specific                                                                                      |
| 52 | 201132_at   | RPL36A    | ribosomal protein L36a pseudogene 51; ribosomal protein L36a pseudogene 37; ribosomal protein L36a pseudogene 49 |
| 52 | 201132_at   | RPL36AP51 | ribosomal protein L36a pseudogene 51; ribosomal protein L36a pseudogene 37; ribosomal protein L36a pseudogene 49 |
| 52 | 201132_at   | RPL36AP49 | ribosomal protein L36a pseudogene 51; ribosomal protein L36a pseudogene 37; ribosomal protein L36a pseudogene 49 |
| 52 | 201132_at   | Hnrnp2    | ribosomal protein L36a pseudogene 51; ribosomal protein L36a pseudogene 37; ribosomal protein L36a pseudogene 49 |
| 52 | 201132_at   | RPL36AP37 | ribosomal protein L36a pseudogene 51; ribosomal protein L36a pseudogene 37; ribosomal protein L36a pseudogene 49 |
| 53 | 217168_s_at | HERPUD1   | homocysteine-inducible, endoplasmic reticulum stress-inducible, ubiquitin-like domain member 1                   |
| 54 | 201318_s_at | MYL12B    | myosin, light chain 12B, regulatory                                                                              |
| 55 | 216682_s_at | fam48a    | family with sequence similarity 48, member A                                                                     |
| 56 | 220152_at   | C10orf95  | chromosome 10 open reading frame 95                                                                              |
| 57 | 218693_at   | tspan15   | tetraspanin 15                                                                                                   |

|    |             |              |                                                                                                                                              |
|----|-------------|--------------|----------------------------------------------------------------------------------------------------------------------------------------------|
| 58 | 213804_at   | INPP5B       | inositol polyphosphate-5-phosphatase, 75kDa                                                                                                  |
| 59 | 222280_at   | GAPDHS       | glyceraldehyde-3-phosphate dehydrogenase, spermatogenic                                                                                      |
| 60 | 210701_at   | cfdp1        | craniofacial development protein 1                                                                                                           |
| 61 | 220215_at   | ZNF669       | zinc finger protein 669                                                                                                                      |
| 62 | 207630_s_at | Crem         | cAMP responsive element modulator                                                                                                            |
| 63 | 203107_x_at | RPS2P17      | ribosomal protein S2 pseudogene 8; ribosomal protein S2 pseudogene 11; ribosomal protein S2 pseudogene 5; ribosomal protein S2 pseudogene 12 |
| 63 | 203107_x_at | rps2         | ribosomal protein S2 pseudogene 8; ribosomal protein S2 pseudogene 11; ribosomal protein S2 pseudogene 5; ribosomal protein S2 pseudogene 12 |
| 63 | 203107_x_at | RPS2P55      | ribosomal protein S2 pseudogene 8; ribosomal protein S2 pseudogene 11; ribosomal protein S2 pseudogene 5; ribosomal protein S2 pseudogene 12 |
| 63 | 203107_x_at | RPS2P8       | ribosomal protein S2 pseudogene 8; ribosomal protein S2 pseudogene 11; ribosomal protein S2 pseudogene 5; ribosomal protein S2 pseudogene 12 |
| 63 | 203107_x_at | RPS2P20      | ribosomal protein S2 pseudogene 8; ribosomal protein S2 pseudogene 11; ribosomal protein S2 pseudogene 5; ribosomal protein S2 pseudogene 12 |
| 63 | 203107_x_at | RPS2P11      | ribosomal protein S2 pseudogene 8; ribosomal protein S2 pseudogene 11; ribosomal protein S2 pseudogene 5; ribosomal protein S2 pseudogene 12 |
| 63 | 203107_x_at | RPS2P12      | ribosomal protein S2 pseudogene 8; ribosomal protein S2 pseudogene 11; ribosomal protein S2 pseudogene 5; ribosomal protein S2 pseudogene 12 |
| 63 | 203107_x_at | RPS2P5       | ribosomal protein S2 pseudogene 8; ribosomal protein S2 pseudogene 11; ribosomal protein S2 pseudogene 5; ribosomal protein S2 pseudogene 12 |
| 63 | 203107_x_at | RPS2P51      | ribosomal protein S2 pseudogene 8; ribosomal protein S2 pseudogene 11; ribosomal protein S2 pseudogene 5; ribosomal protein S2 pseudogene 12 |
| 64 | 206074_s_at | LOC100130009 | hypothetical LOC100130009; high mobility group AT-hook 1                                                                                     |
| 64 | 206074_s_at | HMG1         | hypothetical LOC100130009; high mobility group AT-hook 1                                                                                     |
| 65 | 218445_at   | h2afy2       | H2A histone family, member Y2                                                                                                                |
| 66 | 213159_at   | pcnx         | pecanex homolog (Drosophila)                                                                                                                 |
| 67 | 218676_s_at | PCTP         | phosphatidylcholine transfer protein                                                                                                         |
| 68 | 203825_at   | BRD3         | bromodomain containing 3                                                                                                                     |
| 69 | 219632_s_at | TRPV1        | transient receptor potential cation channel, subfamily V, member 1                                                                           |
| 70 | 203041_s_at | lamp2        | lysosomal-associated membrane protein 2                                                                                                      |
| 71 | 206761_at   | Cd96         | CD96 molecule                                                                                                                                |
| 72 | 205174_s_at | QPCT         | glutaminy-peptide cyclotransferase                                                                                                           |
| 73 | 207188_at   | Cdk3         | cyclin-dependent kinase 3                                                                                                                    |
| 74 | 214749_s_at | LOC653354    | similar to armadillo repeat containing, X-linked 6; armadillo repeat containing, X-linked 6                                                  |
| 74 | 214749_s_at | Armxc6       | similar to armadillo repeat containing, X-linked 6; armadillo repeat containing, X-linked 6                                                  |
| 75 | 202340_x_at | NR4A1        | nuclear receptor subfamily 4, group A, member 1                                                                                              |
| 76 | 203761_at   | SLA          | Src-like-adaptor                                                                                                                             |
| 77 | 212414_s_at | SEPT6        | septin 6                                                                                                                                     |
| 78 | 217645_at   | COX16        | COX16 cytochrome c oxidase assembly homolog (S. cerevisiae)                                                                                  |
| 79 | 209810_at   | sftpb        | surfactant protein B                                                                                                                         |
| 80 | 201221_s_at | SNRNP70      | small nuclear ribonucleoprotein 70kDa (U1)                                                                                                   |
| 81 | 213006_at   | cebpd        | CCAAT/enhancer binding protein (C/EBP), delta                                                                                                |
| 82 | 212934_at   | UBXN2B       | UBX domain protein 2B                                                                                                                        |
| 83 | 208828_at   | POLE3        | polymerase (DNA directed), epsilon 3 (p17 subunit)                                                                                           |
| 84 | 206757_at   | PDE5A        | phosphodiesterase 5A, cGMP-specific                                                                                                          |
| 85 | 217995_at   | SQRDL        | sulfide quinone reductase-like (yeast)                                                                                                       |
| 86 | 212659_s_at | IL1RN        | interleukin 1 receptor antagonist                                                                                                            |
| 87 | 219846_at   | YY1AP1       | YY1 associated protein 1; gon-4-like (C. elegans)                                                                                            |
| 87 | 219846_at   | GON4L        | YY1 associated protein 1; gon-4-like (C. elegans)                                                                                            |
| 88 | 210047_at   | SLC11A2      | solute carrier family 11 (proton-coupled divalent metal ion transporters),                                                                   |

|     |             |          |                                                                                                      |
|-----|-------------|----------|------------------------------------------------------------------------------------------------------|
|     |             |          | member 2                                                                                             |
| 89  | 205674_x_at | FXYD2    | FXYD domain containing ion transport regulator 2                                                     |
| 90  | 215786_at   | rsf1     | remodeling and spacing factor 1                                                                      |
| 91  | 213641_at   | ZNF500   | zinc finger protein 500                                                                              |
| 92  | 218341_at   | PPCS     | phosphopantothenoylcysteine synthetase                                                               |
| 93  | 202414_at   | ERCC5    | excision repair cross-complementing rodent repair deficiency, complementation group 5                |
| 94  | 217671_at   | rfx3     | regulatory factor X, 3 (influences HLA class II expression)                                          |
| 95  | 222141_at   | Klhl22   | kelch-like 22 (Drosophila)                                                                           |
| 96  | 201546_at   | Trip12   | thyroid hormone receptor interactor 12                                                               |
| 97  | 201013_s_at | paics    | phosphoribosylaminoimidazole carboxylase, phosphoribosylaminoimidazole succinocarboxamide synthetase |
| 98  | 201677_at   | C3orf37  | chromosome 3 open reading frame 37                                                                   |
| 99  | 209995_s_at | TCL1A    | T-cell leukemia/lymphoma 1A                                                                          |
| 100 | 214487_s_at | RAP2A    | RAP2A, member of RAS oncogene family                                                                 |
| 101 | 204826_at   | CCNF     | cyclin F                                                                                             |
| 102 | 217575_s_at | SOS2     | son of sevenless homolog 2 (Drosophila)                                                              |
| 103 | 202789_at   | PLCG1    | phospholipase C, gamma 1                                                                             |
| 104 | 209185_s_at | irs2     | insulin receptor substrate 2                                                                         |
| 105 | 211715_s_at | BDH1     | 3-hydroxybutyrate dehydrogenase, type 1                                                              |
| 106 | 205129_at   | NPM3     | nucleophosmin/nucleoplasmin, 3                                                                       |
| 107 | 206257_at   | CCDC9    | coiled-coil domain containing 9                                                                      |
| 108 | 214775_at   | N4BP3    | Nedd4 binding protein 3                                                                              |
| 109 | 213340_s_at | KIAA0495 | KIAA0495                                                                                             |
| 110 | 203127_s_at | Sptlc2   | serine palmitoyltransferase, long chain base subunit 2                                               |
| 111 | 205209_at   | ACVR1B   | activin A receptor, type IB                                                                          |
| 112 | 202864_s_at | Sp100    | SP100 nuclear antigen                                                                                |
| 113 | 220728_at   | NA       | not yet annotated                                                                                    |
| 114 | 203630_s_at | COG5     | component of oligomeric golgi complex 5                                                              |
| 115 | 212115_at   | HN1L     | hematological and neurological expressed 1-like                                                      |
| 116 | 220384_at   | TXNDC3   | thioredoxin domain containing 3 (spermatzoa)                                                         |
| 117 | 206453_s_at | Ndrp2    | NDRG family member 2                                                                                 |
| 118 | 221588_x_at | Aldh6a1  | aldehyde dehydrogenase 6 family, member A1                                                           |
| 119 | 213639_s_at | ZNF500   | zinc finger protein 500                                                                              |
| 120 | 222027_at   | Nucks1   | nuclear casein kinase and cyclin-dependent kinase substrate 1                                        |
| 121 | 215390_at   | c9orf5   | chromosome 9 open reading frame 5                                                                    |
| 122 | 215030_at   | Grsf1    | G-rich RNA sequence binding factor 1                                                                 |
| 123 | 202651_at   | lpgat1   | lysophosphatidylglycerol acyltransferase 1                                                           |
| 124 | 210950_s_at | FDFT1    | farnesyl-diphosphate farnesyltransferase 1                                                           |
| 125 | 219315_s_at | TMEM204  | transmembrane protein 204                                                                            |
| 126 | 217414_x_at | hba2     | hemoglobin, alpha 2; hemoglobin, alpha 1                                                             |
| 126 | 217414_x_at | HBA1     | hemoglobin, alpha 2; hemoglobin, alpha 1                                                             |
| 127 | 204053_x_at | PTENP1   | phosphatase and tensin homolog; phosphatase and tensin homolog pseudogene 1                          |
| 127 | 204053_x_at | pten     | phosphatase and tensin homolog; phosphatase and tensin homolog pseudogene 1                          |
| 128 | 215151_at   | dock10   | dedicator of cytokinesis 10                                                                          |
| 129 | 213462_at   | NPAS2    | neuronal PAS domain protein 2                                                                        |
| 130 | 213008_at   | fanci    | Fanconi anemia, complementation group I                                                              |
| 131 | 222006_at   | LETM1    | leucine zipper-EF-hand containing transmembrane protein 1                                            |
| 132 | 221101_at   | NA       | not yet annotated                                                                                    |
| 133 | 209623_at   | mccc2    | methylcrotonoyl-Coenzyme A carboxylase 2 (beta)                                                      |
| 134 | 205698_s_at | map2k6   | mitogen-activated protein kinase kinase 6                                                            |

|     |             |              |                                                                                            |
|-----|-------------|--------------|--------------------------------------------------------------------------------------------|
| 135 | 208843_s_at | gorasp2      | golgi reassembly stacking protein 2, 55kDa                                                 |
| 136 | 212192_at   | kctd12       | potassium channel tetramerisation domain containing 12                                     |
| 137 | 201581_at   | TMX4         | thioredoxin-related transmembrane protein 4                                                |
| 138 | 222071_s_at | SLCO4C1      | solute carrier organic anion transporter family, member 4C1                                |
| 139 | 205254_x_at | TCF7         | transcription factor 7 (T-cell specific, HMG-box)                                          |
| 140 | 208499_s_at | DNAJC3       | DnaJ (Hsp40) homolog, subfamily C, member 3                                                |
| 141 | 219061_s_at | Lage3        | L antigen family, member 3                                                                 |
| 142 | 218495_at   | UXT          | ubiquitously-expressed transcript                                                          |
| 143 | 221797_at   | C17orf90     | chromosome 17 open reading frame 90                                                        |
| 144 | 204018_x_at | hba2         | hemoglobin, alpha 2; hemoglobin, alpha 1                                                   |
| 144 | 204018_x_at | HBA1         | hemoglobin, alpha 2; hemoglobin, alpha 1                                                   |
| 145 | 203215_s_at | myo6         | myosin VI                                                                                  |
| 146 | 213922_at   | TTBK2        | tau tubulin kinase 2                                                                       |
| 147 | 206158_s_at | CNBP         | CCHC-type zinc finger, nucleic acid binding protein                                        |
| 148 | 210450_at   | LOC90925     | hypothetical protein LOC90925                                                              |
| 149 | 213435_at   | SATB2        | SATB homeobox 2                                                                            |
| 150 | 213658_at   | ZNF710       | zinc finger protein 710                                                                    |
| 151 | 203226_s_at | Tspan31      | tetraspanin 31                                                                             |
| 152 | 218150_at   | arl5a        | ADP-ribosylation factor-like 5A                                                            |
| 153 | 213666_at   | SEPT6        | septin 6                                                                                   |
| 154 | 216043_x_at | cyp20a1      | cytochrome P450, family 20, subfamily A, polypeptide 1                                     |
| 155 | 212542_s_at | PHIP         | pleckstrin homology domain interacting protein                                             |
| 156 | 201198_s_at | PSMD1        | proteasome (prosome, macropain) 26S subunit, non-ATPase, 1                                 |
| 157 | 203549_s_at | Lpl          | lipoprotein lipase                                                                         |
| 158 | 202658_at   | PEX11B       | peroxisomal biogenesis factor 11 beta                                                      |
| 159 | 221417_x_at | S1PR5        | sphingosine-1-phosphate receptor 5                                                         |
| 160 | 204589_at   | NUAK1        | NUAK family, SNF1-like kinase, 1                                                           |
| 161 | 212374_at   | fem1b        | fem-1 homolog b (C. elegans)                                                               |
| 162 | 204900_x_at | SAP30        | Sin3A-associated protein, 30kDa                                                            |
| 163 | 212996_s_at | URB1         | URB1 ribosome biogenesis 1 homolog (S. cerevisiae)                                         |
| 164 | 201041_s_at | DUSP1        | dual specificity phosphatase 1                                                             |
| 165 | 206210_s_at | cetp         | cholesteryl ester transfer protein, plasma                                                 |
| 166 | 217842_at   | luc7l2       | LUC7-like 2 (S. cerevisiae)                                                                |
| 167 | 212361_s_at | ATP2A2       | ATPase, Ca <sup>++</sup> transporting, cardiac muscle, slow twitch 2                       |
| 168 | 202446_s_at | plscr1       | phospholipid scramblase 1                                                                  |
| 169 | 219206_x_at | Tmbim4       | transmembrane BAX inhibitor motif containing 4                                             |
| 170 | 220354_at   | LOC100134018 | similar to hCG1774568                                                                      |
| 171 | 217670_at   | RPLP2P3      | ribosomal protein, large, P2 pseudogene 3; ribosomal protein, large, P2                    |
| 171 | 217670_at   | Rplp2        | ribosomal protein, large, P2 pseudogene 3; ribosomal protein, large, P2                    |
| 172 | 206980_s_at | FLT3LG       | fms-related tyrosine kinase 3 ligand                                                       |
| 173 | 209458_x_at | hba2         | hemoglobin, alpha 2; hemoglobin, alpha 1                                                   |
| 173 | 209458_x_at | HBA1         | hemoglobin, alpha 2; hemoglobin, alpha 1                                                   |
| 174 | 218845_at   | dusp22       | similar to mitogen-activated protein kinase phosphatase x; dual specificity phosphatase 22 |
| 174 | 218845_at   | LOC100134291 | similar to mitogen-activated protein kinase phosphatase x; dual specificity phosphatase 22 |
| 175 | 212766_s_at | ISG20L2      | interferon stimulated exonuclease gene 20kDa-like 2                                        |
| 176 | 221221_s_at | KLHL3        | kelch-like 3 (Drosophila)                                                                  |
| 177 | 213302_at   | PFAS         | phosphoribosylformylglycinamide synthase                                                   |
| 178 | 50374_at    | C17orf90     | chromosome 17 open reading frame 90                                                        |
| 179 | 216751_at   | NA           | not yet annotated                                                                          |

|     |             |               |                                                                                                                       |
|-----|-------------|---------------|-----------------------------------------------------------------------------------------------------------------------|
| 180 | 213871_s_at | C6orf108      | chromosome 6 open reading frame 108                                                                                   |
| 181 | 207434_s_at | FXYD2         | FXYD domain containing ion transport regulator 2                                                                      |
| 182 | 60528_at    | JMJD7-PLA2G4B | JMJD7-PLA2G4B readthrough transcript; phospholipase A2, group IVB (cytosolic); jumonji domain containing 7            |
| 182 | 60528_at    | JMJD7         | JMJD7-PLA2G4B readthrough transcript; phospholipase A2, group IVB (cytosolic); jumonji domain containing 7            |
| 182 | 60528_at    | PLA2G4B       | JMJD7-PLA2G4B readthrough transcript; phospholipase A2, group IVB (cytosolic); jumonji domain containing 7            |
| 183 | 201382_at   | CACYBP        | similar to calyculin binding protein; calyculin binding protein                                                       |
| 183 | 201382_at   | LOC644877     | similar to calyculin binding protein; calyculin binding protein                                                       |
| 184 | 202163_s_at | cnot8         | CCR4-NOT transcription complex, subunit 8                                                                             |
| 185 | 217933_s_at | LAP3          | leucine aminopeptidase 3                                                                                              |
| 186 | 202119_s_at | CPNE3         | copine III                                                                                                            |
| 187 | 209992_at   | Pfkfb2        | 6-phosphofructo-2-kinase/fructose-2,6-biphosphatase 2                                                                 |
| 188 | 210410_s_at | C6orf26       | chromosome 6 open reading frame 26                                                                                    |
| 189 | 209497_s_at | rbm4b         | RNA binding motif protein 4B                                                                                          |
| 190 | 206352_s_at | PEX10         | peroxisomal biogenesis factor 10                                                                                      |
| 191 | 222273_at   | PAPOLG        | poly(A) polymerase gamma                                                                                              |
| 192 | 208892_s_at | dusp6         | dual specificity phosphatase 6                                                                                        |
| 193 | 216218_s_at | PLCL2         | phospholipase C-like 2                                                                                                |
| 194 | 206332_s_at | IFI16         | interferon, gamma-inducible protein 16                                                                                |
| 195 | 204054_at   | PTENP1        | phosphatase and tensin homolog; phosphatase and tensin homolog pseudogene 1                                           |
| 195 | 204054_at   | pten          | phosphatase and tensin homolog; phosphatase and tensin homolog pseudogene 1                                           |
| 196 | 204555_s_at | PPP1R3D       | protein phosphatase 1, regulatory (inhibitor) subunit 3D                                                              |
| 197 | 213582_at   | Atp11a        | ATPase, class VI, type 11A                                                                                            |
| 198 | 212582_at   | OSBPL8        | oxysterol binding protein-like 8                                                                                      |
| 199 | 215892_at   | ZNF440        | zinc finger protein 440                                                                                               |
| 200 | 217871_s_at | LOC284889     | hypothetical protein LOC284889                                                                                        |
| 201 | 201861_s_at | Lrrfip1       | leucine rich repeat (in FLII) interacting protein 1                                                                   |
| 202 | 217738_at   | NAMPT         | nicotinamide phosphoribosyltransferase                                                                                |
| 203 | 221995_s_at | MRP63         | mitochondrial ribosomal protein 63                                                                                    |
| 204 | 202137_s_at | zmynd11       | zinc finger, MYND domain containing 11                                                                                |
| 205 | 218213_s_at | c11orf10      | chromosome 11 open reading frame 10                                                                                   |
| 206 | 212919_at   | dcp2          | DCP2 decapping enzyme homolog (S. cerevisiae)                                                                         |
| 207 | 201417_at   | Sox4          | SRY (sex determining region Y)-box 4                                                                                  |
| 208 | 211071_s_at | MLLT11        | myeloid/lymphoid or mixed-lineage leukemia (trithorax homolog, Drosophila); translocated to, 11                       |
| 209 | 210543_s_at | PRKDC         | similar to protein kinase, DNA-activated, catalytic polypeptide; protein kinase, DNA-activated, catalytic polypeptide |
| 209 | 210543_s_at | LOC731751     | similar to protein kinase, DNA-activated, catalytic polypeptide; protein kinase, DNA-activated, catalytic polypeptide |
| 210 | 210098_s_at | NOL7          | nucleolar protein 7, 27kDa                                                                                            |
| 211 | 204386_s_at | MRP63         | mitochondrial ribosomal protein 63                                                                                    |
| 212 | 202539_s_at | HMGCR         | 3-hydroxy-3-methylglutaryl-Coenzyme A reductase                                                                       |
| 213 | 201987_at   | MED13         | mediator complex subunit 13                                                                                           |
| 214 | 202753_at   | PSMD6         | proteasome (prosome, macropain) 26S subunit, non-ATPase, 6                                                            |
| 215 | 218807_at   | VAV3          | vav 3 guanine nucleotide exchange factor                                                                              |
| 216 | 211699_x_at | hba2          | hemoglobin, alpha 2; hemoglobin, alpha 1                                                                              |
| 216 | 211699_x_at | HBA1          | hemoglobin, alpha 2; hemoglobin, alpha 1                                                                              |
| 217 | 212300_at   | TXLNA         | taxilin alpha                                                                                                         |
| 218 | 205181_at   | ZNF193        | zinc finger protein 193                                                                                               |

|     |                      |          |                                                                                                                                               |
|-----|----------------------|----------|-----------------------------------------------------------------------------------------------------------------------------------------------|
| 219 | 211799_x_at          | HLA-C    | major histocompatibility complex, class I, C; major histocompatibility complex, class I, B                                                    |
| 219 | 211799_x_at          | HLA-B    | major histocompatibility complex, class I, C; major histocompatibility complex, class I, B                                                    |
| 220 | 204530_s_at          | Tox      | thymocyte selection-associated high mobility group box                                                                                        |
| 221 | AFFX-r2-Ec-bioB-M_at |          |                                                                                                                                               |
| 222 | 215105_at            | cg030    | hypothetical CG030                                                                                                                            |
| 223 | 216230_x_at          | SMPD1    | sphingomyelin phosphodiesterase 1, acid lysosomal                                                                                             |
| 224 | 204909_at            | DDX6     | DEAD (Asp-Glu-Ala-Asp) box polypeptide 6                                                                                                      |
| 225 | 213798_s_at          | CAP1     | CAP, adenylate cyclase-associated protein 1 (yeast)                                                                                           |
| 226 | 209922_at            | BRAP     | BRCA1 associated protein                                                                                                                      |
| 227 | 214801_at            | NA       | not yet annotated                                                                                                                             |
| 228 | 221840_at            | PTPRE    | protein tyrosine phosphatase, receptor type, E                                                                                                |
| 229 | 209633_at            | Ppp2r3a  | protein phosphatase 2 (formerly 2A), regulatory subunit B", alpha                                                                             |
| 230 | 209960_at            | Hgf      | hepatocyte growth factor (hepapoietin A; scatter factor)                                                                                      |
| 231 | 210050_at            | TPI1     | TPI1 pseudogene; triosephosphate isomerase 1                                                                                                  |
| 231 | 210050_at            | TPI1P1   | TPI1 pseudogene; triosephosphate isomerase 1                                                                                                  |
| 232 | 220954_s_at          | PILRB    | paired immunoglobulin-like type 2 receptor beta                                                                                               |
| 233 | 204516_at            | ATXN7    | ataxin 7                                                                                                                                      |
| 234 | 209702_at            | FTO      | fat mass and obesity associated                                                                                                               |
| 235 | 202393_s_at          | KLF10    | Kruppel-like factor 10                                                                                                                        |
| 236 | 210896_s_at          | asph     | aspartate beta-hydroxylase                                                                                                                    |
| 237 | 204091_at            | PDE6D    | phosphodiesterase 6D, cGMP-specific, rod, delta                                                                                               |
| 238 | 202005_at            | ST14     | suppression of tumorigenicity 14 (colon carcinoma)                                                                                            |
| 239 | 41220_at             | SEPT9    | septin 9                                                                                                                                      |
| 240 | 218958_at            | C19orf60 | chromosome 19 open reading frame 60                                                                                                           |
| 241 | 208580_x_at          | Hist1h4c | histone cluster 1, H4l; histone cluster 1, H4k; histone cluster 4, H4; histone cluster 1, H4h; histone cluster 1, H4j; histone cluster 1, H4i |
| 241 | 208580_x_at          | Hist1h4d | histone cluster 1, H4l; histone cluster 1, H4k; histone cluster 4, H4; histone cluster 1, H4h; histone cluster 1, H4j; histone cluster 1, H4i |
| 241 | 208580_x_at          | Hist1h4f | histone cluster 1, H4l; histone cluster 1, H4k; histone cluster 4, H4; histone cluster 1, H4h; histone cluster 1, H4j; histone cluster 1, H4i |
| 241 | 208580_x_at          | Hist1h4h | histone cluster 1, H4l; histone cluster 1, H4k; histone cluster 4, H4; histone cluster 1, H4h; histone cluster 1, H4j; histone cluster 1, H4i |
| 241 | 208580_x_at          | Hist1h4i | histone cluster 1, H4l; histone cluster 1, H4k; histone cluster 4, H4; histone cluster 1, H4h; histone cluster 1, H4j; histone cluster 1, H4i |
| 241 | 208580_x_at          | Hist1h4j | histone cluster 1, H4l; histone cluster 1, H4k; histone cluster 4, H4; histone cluster 1, H4h; histone cluster 1, H4j; histone cluster 1, H4i |
| 241 | 208580_x_at          | HIST2H4A | histone cluster 1, H4l; histone cluster 1, H4k; histone cluster 4, H4; histone cluster 1, H4h; histone cluster 1, H4j; histone cluster 1, H4i |
| 241 | 208580_x_at          | Hist1h4a | histone cluster 1, H4l; histone cluster 1, H4k; histone cluster 4, H4; histone cluster 1, H4h; histone cluster 1, H4j; histone cluster 1, H4i |
| 241 | 208580_x_at          | Hist1h4b | histone cluster 1, H4l; histone cluster 1, H4k; histone cluster 4, H4; histone cluster 1, H4h; histone cluster 1, H4j; histone cluster 1, H4i |
| 241 | 208580_x_at          | HIST2H4B | histone cluster 1, H4l; histone cluster 1, H4k; histone cluster 4, H4; histone cluster 1, H4h; histone cluster 1, H4j; histone cluster 1, H4i |
| 241 | 208580_x_at          | HIST1H4E | histone cluster 1, H4l; histone cluster 1, H4k; histone cluster 4, H4; histone cluster 1, H4h; histone cluster 1, H4j; histone cluster 1, H4i |
| 241 | 208580_x_at          | Hist1h4k | histone cluster 1, H4l; histone cluster 1, H4k; histone cluster 4, H4; histone cluster 1, H4h; histone cluster 1, H4j; histone cluster 1, H4i |
| 241 | 208580_x_at          | hist1h4l | histone cluster 1, H4l; histone cluster 1, H4k; histone cluster 4, H4; histone cluster 1, H4h; histone cluster 1, H4j; histone cluster 1, H4i |
| 241 | 208580_x_at          | Hist4h4  | histone cluster 1, H4l; histone cluster 1, H4k; histone cluster 4, H4; histone                                                                |

|     |             |           |                                                                                                 |
|-----|-------------|-----------|-------------------------------------------------------------------------------------------------|
|     |             |           | cluster 1, H4h; histone cluster 1, H4j; histone cluster 1, H4i                                  |
| 242 | 213818_x_at | Col5a1    | collagen, type V, alpha 1                                                                       |
| 243 | 200732_s_at | ptp4a1    | protein tyrosine phosphatase type IVA, member 1                                                 |
| 244 | 204094_s_at | TSC22D2   | TSC22 domain family, member 2                                                                   |
| 245 | 209030_s_at | CADM1     | cell adhesion molecule 1                                                                        |
| 246 | 213390_at   | Zc3h4     | zinc finger CCCH-type containing 4                                                              |
| 247 | 219696_at   | DENND1B   | DENN/MADD domain containing 1B                                                                  |
| 248 | 213168_at   | SP3       | Sp3 transcription factor                                                                        |
| 249 | 222119_s_at | fbxo11    | F-box protein 11                                                                                |
| 250 | 209759_s_at | dci       | dodecenoyl-Coenzyme A delta isomerase (3,2 trans-enoyl-Coenzyme A isomerase)                    |
| 251 | 221741_s_at | YTHDF1    | YTH domain family, member 1                                                                     |
| 252 | 203739_at   | ZNF217    | zinc finger protein 217                                                                         |
| 253 | 209405_s_at | FAM3A     | family with sequence similarity 3, member A                                                     |
| 254 | 212916_at   | PHF8      | PHD finger protein 8                                                                            |
| 255 | 213883_s_at | TM2D1     | TM2 domain containing 1                                                                         |
| 256 | 217765_at   | nrbp1     | nuclear receptor binding protein 1                                                              |
| 257 | 212263_at   | QKI       | quaking homolog, KH domain RNA binding (mouse)                                                  |
| 258 | 209899_s_at | PUF60     | poly-U binding splicing factor 60KDa                                                            |
| 259 | 210350_x_at | ing1      | inhibitor of growth family, member 1                                                            |
| 260 | 200731_s_at | ptp4a1    | protein tyrosine phosphatase type IVA, member 1                                                 |
| 261 | 212569_at   | SMCHD1    | structural maintenance of chromosomes flexible hinge domain containing 1                        |
| 262 | 216095_x_at | MTMR1     | myotubularin related protein 1                                                                  |
| 263 | 213341_at   | FEM1C     | fem-1 homolog c (C. elegans)                                                                    |
| 264 | 218530_at   | fhod1     | formin homology 2 domain containing 1                                                           |
| 265 | 208865_at   | csnk1a1   | casein kinase 1, alpha 1                                                                        |
| 266 | 202041_s_at | FIBP      | fibroblast growth factor (acidic) intracellular binding protein                                 |
| 267 | 221613_s_at | zfand6    | zinc finger, AN1-type domain 6                                                                  |
| 268 | 221437_s_at | MRPS15    | mitochondrial ribosomal protein S15                                                             |
| 269 | 204104_at   | Snapc2    | small nuclear RNA activating complex, polypeptide 2, 45kDa                                      |
| 270 | 203422_at   | Pold1     | polymerase (DNA directed), delta 1, catalytic subunit 125kDa                                    |
| 271 | 216221_s_at | PUM2      | pumilio homolog 2 (Drosophila)                                                                  |
| 272 | 219157_at   | KLHL2     | kelch-like 2, Mayven (Drosophila)                                                               |
| 273 | 202417_at   | keap1     | kelch-like ECH-associated protein 1                                                             |
| 274 | 212824_at   | FUBP3     | far upstream element (FUSE) binding protein 3                                                   |
| 275 | 200097_s_at | LOC644063 | heterogeneous nuclear ribonucleoprotein K; similar to heterogeneous nuclear ribonucleoprotein K |
| 275 | 200097_s_at | Hnrnpk    | heterogeneous nuclear ribonucleoprotein K; similar to heterogeneous nuclear ribonucleoprotein K |
| 276 | 201641_at   | BST2      | NPC-A-7; bone marrow stromal cell antigen 2                                                     |
| 277 | 202991_at   | stard3    | StAR-related lipid transfer (START) domain containing 3                                         |
| 278 | 213511_s_at | MTMR1     | myotubularin related protein 1                                                                  |
| 279 | 205917_at   | ZNF264    | zinc finger protein 264                                                                         |
| 280 | 221952_x_at | trmt5     | TRM5 tRNA methyltransferase 5 homolog (S. cerevisiae)                                           |
| 281 | 214076_at   | gfod2     | glucose-fructose oxidoreductase domain containing 2                                             |
| 282 | 201310_s_at | C5orf13   | chromosome 5 open reading frame 13                                                              |
| 283 | 211336_x_at | LILRB1    | leukocyte immunoglobulin-like receptor, subfamily B (with TM and ITIM domains), member 1        |
| 284 | 221596_s_at | c7orf64   | chromosome 7 open reading frame 64                                                              |
| 285 | 203330_s_at | STX5      | syntaxin 5                                                                                      |
| 286 | 222335_at   | NA        | not yet annotated                                                                               |
| 287 | 201251_at   | LOC652797 | similar to Pyruvate kinase, isozymes M1/M2 (Pyruvate kinase muscle                              |



|     |             |              |                                                                                                                                         |
|-----|-------------|--------------|-----------------------------------------------------------------------------------------------------------------------------------------|
|     |             |              | isozyme) (Cytosolic thyroid hormone-binding protein) (CTHBP) (THBP1)                                                                    |
| 287 | 201251_at   | PKM2         | similar to Pyruvate kinase, isozymes M1/M2 (Pyruvate kinase muscle isozyme) (Cytosolic thyroid hormone-binding protein) (CTHBP) (THBP1) |
| 288 | 32836_at    | AGPAT1       | 1-acylglycerol-3-phosphate O-acyltransferase 1 (lysophosphatidic acid acyltransferase, alpha)                                           |
| 289 | 214794_at   | PA2G4        | proliferation-associated 2G4, 38kDa; proliferation-associated 2G4 pseudogene 4                                                          |
| 289 | 214794_at   | PA2G4P4      | proliferation-associated 2G4, 38kDa; proliferation-associated 2G4 pseudogene 4                                                          |
| 290 | 212722_s_at | JMJD6        | jumonji domain containing 6                                                                                                             |
| 291 | 213453_x_at | LOC100133042 | glyceraldehyde-3-phosphate dehydrogenase-like 6; hypothetical protein LOC100133042; glyceraldehyde-3-phosphate dehydrogenase            |
| 291 | 213453_x_at | GAPDH        | glyceraldehyde-3-phosphate dehydrogenase-like 6; hypothetical protein LOC100133042; glyceraldehyde-3-phosphate dehydrogenase            |
| 291 | 213453_x_at | GAPDHL6      | glyceraldehyde-3-phosphate dehydrogenase-like 6; hypothetical protein LOC100133042; glyceraldehyde-3-phosphate dehydrogenase            |
| 292 | 216109_at   | Med13l       | mediator complex subunit 13-like                                                                                                        |
| 293 | 221771_s_at | Mphosph8     | M-phase phosphoprotein 8                                                                                                                |
| 294 | 209051_s_at | RALGDS       | ral guanine nucleotide dissociation stimulator                                                                                          |
| 295 | 218443_s_at | DAZAP1       | DAZ associated protein 1                                                                                                                |
| 296 | 212927_at   | smc5         | structural maintenance of chromosomes 5                                                                                                 |
| 297 | 215597_x_at | MYST4        | MYST histone acetyltransferase (monocytic leukemia) 4                                                                                   |
| 298 | 37254_at    | ZNF133       | zinc finger protein 133                                                                                                                 |
| 299 | 217923_at   | pef1         | penta-EF-hand domain containing 1                                                                                                       |
| 300 | 217929_s_at | KIAA0319L    | KIAA0319-like                                                                                                                           |
| 301 | 206133_at   | XAF1         | XIAP associated factor 1                                                                                                                |
| 302 | 214731_at   | CTTNBP2NL    | CTTNBP2 N-terminal like                                                                                                                 |
| 303 | 215374_at   | Papola       | poly(A) polymerase alpha                                                                                                                |
| 304 | 202545_at   | PRKCD        | protein kinase C, delta                                                                                                                 |
| 305 | 200048_s_at | Jtb          | jumping translocation breakpoint                                                                                                        |
| 306 | 218772_x_at | tmem38b      | transmembrane protein 38B                                                                                                               |
| 307 | 209105_at   | NCOA1        | nuclear receptor coactivator 1                                                                                                          |
| 308 | 206207_at   | clc          | Charcot-Leyden crystal protein                                                                                                          |
| 309 | 219825_at   | CYP26B1      | cytochrome P450, family 26, subfamily B, polypeptide 1                                                                                  |
| 310 | 202956_at   | ARFGEF1      | ADP-ribosylation factor guanine nucleotide-exchange factor 1(brefeldin A-inhibited)                                                     |
| 311 | 219256_s_at | SH3TC1       | SH3 domain and tetratricopeptide repeats 1                                                                                              |
| 312 | 204176_at   | KLHL20       | kelch-like 20 (Drosophila)                                                                                                              |
| 313 | 201113_at   | Tufm         | Tu translation elongation factor, mitochondrial                                                                                         |
| 314 | 215544_s_at | UBOX5        | U-box domain containing 5                                                                                                               |
| 315 | 218995_s_at | EDN1         | endothelin 1                                                                                                                            |
| 316 | 219402_s_at | Der1l        | Der1-like domain family, member 1                                                                                                       |
| 317 | 207418_s_at | DDO          | D-aspartate oxidase                                                                                                                     |
| 318 | 221902_at   | GPR153       | G protein-coupled receptor 153                                                                                                          |
| 319 | 217371_s_at | IL15         | interleukin 15                                                                                                                          |
| 320 | 212175_s_at | Ak2          | adenylate kinase 2                                                                                                                      |
| 321 | 202643_s_at | TNFAIP3      | tumor necrosis factor, alpha-induced protein 3                                                                                          |
| 322 | 209808_x_at | ing1         | inhibitor of growth family, member 1                                                                                                    |
| 323 | 221971_x_at | AGAP6        | ArfGAP with GTPase domain, ankyrin repeat and PH domain 4; ArfGAP with GTPase domain, ankyrin repeat and PH domain 6                    |
| 323 | 221971_x_at | AGAP4        | ArfGAP with GTPase domain, ankyrin repeat and PH domain 4; ArfGAP with GTPase domain, ankyrin repeat and PH domain 6                    |
| 324 | 212343_at   | YIPF6        | Yip1 domain family, member 6                                                                                                            |

|     |                      |          |                                                                                                                              |
|-----|----------------------|----------|------------------------------------------------------------------------------------------------------------------------------|
| 325 | 201036_s_at          | hadh     | hydroxyacyl-Coenzyme A dehydrogenase                                                                                         |
| 326 | 33494_at             | Etfdh    | electron-transferring-flavoprotein dehydrogenase                                                                             |
| 327 | 212462_at            | MYST4    | MYST histone acetyltransferase (monocytic leukemia) 4                                                                        |
| 328 | 218273_s_at          | Pdp1     | pyruvate dehydrogenase phosphatase catalytic subunit 1                                                                       |
| 329 | 213114_at            | RER1     | RER1 retention in endoplasmic reticulum 1 homolog ( <i>S. cerevisiae</i> )                                                   |
| 330 | 203545_at            | ALG8     | asparagine-linked glycosylation 8, alpha-1,3-glucosyltransferase homolog ( <i>S. cerevisiae</i> )                            |
| 331 | 220052_s_at          | tinf2    | TERF1 (TRF1)-interacting nuclear factor 2                                                                                    |
| 332 | 214722_at            | NOTCH2NL | Notch homolog 2 ( <i>Drosophila</i> ) N-terminal like                                                                        |
| 333 | 203746_s_at          | HCCS     | holocytochrome c synthase (cytochrome c heme-lyase)                                                                          |
| 334 | 219617_at            | c2orf34  | chromosome 2 open reading frame 34                                                                                           |
| 335 | 218381_s_at          | U2AF2    | U2 small nuclear RNA auxiliary factor 2                                                                                      |
| 336 | 210097_s_at          | NOL7     | nucleolar protein 7, 27kDa                                                                                                   |
| 337 | 221290_s_at          | Mum1     | melanoma associated antigen (mutated) 1                                                                                      |
| 338 | 33307_at             | RRP7B    | ribosomal RNA processing 7 homolog B ( <i>S. cerevisiae</i> ); ribosomal RNA processing 7 homolog A ( <i>S. cerevisiae</i> ) |
| 338 | 33307_at             | RRP7A    | ribosomal RNA processing 7 homolog B ( <i>S. cerevisiae</i> ); ribosomal RNA processing 7 homolog A ( <i>S. cerevisiae</i> ) |
| 339 | 217537_x_at          | NA       | not yet annotated                                                                                                            |
| 340 | 210756_s_at          | Notch2   | Notch homolog 2 ( <i>Drosophila</i> )                                                                                        |
| 341 | 202882_x_at          | NOL7     | nucleolar protein 7, 27kDa                                                                                                   |
| 342 | 209226_s_at          | tnpo1    | transportin 1                                                                                                                |
| 343 | 207926_at            | GP5      | glycoprotein V (platelet)                                                                                                    |
| 344 | 221808_at            | RAB9A    | RAB9A, member RAS oncogene family                                                                                            |
| 345 | 206746_at            | bfsp1    | beaded filament structural protein 1, filensin                                                                               |
| 346 | 211310_at            | EZH1     | enhancer of zeste homolog 1 ( <i>Drosophila</i> )                                                                            |
| 347 | 211745_x_at          | hba2     | hemoglobin, alpha 2; hemoglobin, alpha 1                                                                                     |
| 347 | 211745_x_at          | HBA1     | hemoglobin, alpha 2; hemoglobin, alpha 1                                                                                     |
| 348 | 210466_s_at          | serbp1   | SERPINE1 mRNA binding protein 1                                                                                              |
| 349 | 213852_at            | RBM8A    | RNA binding motif protein 8A                                                                                                 |
| 350 | 217027_x_at          | KPNB1    | karyopherin (importin) beta 1                                                                                                |
| 351 | 211678_s_at          | RNF114   | ring finger protein 114                                                                                                      |
| 352 | 207357_s_at          | GALNT10  | UDP-N-acetyl-alpha-D-galactosamine:polypeptide N-acetylgalactosaminyltransferase 10 (GalNAc-T10)                             |
| 353 | AFFX-r2-Ec-bioB-5_at |          |                                                                                                                              |
| 354 | 207076_s_at          | ASS1     | argininosuccinate synthetase 1                                                                                               |
| 355 | 220835_s_at          | ZNF407   | zinc finger protein 407                                                                                                      |
| 356 | 208777_s_at          | Psmd11   | proteasome (prosome, macropain) 26S subunit, non-ATPase, 11                                                                  |
| 357 | 212071_s_at          | SPTBN1   | spectrin, beta, non-erythrocytic 1                                                                                           |
| 358 | 207104_x_at          | LILRB1   | leukocyte immunoglobulin-like receptor, subfamily B (with TM and ITIM domains), member 1                                     |
| 359 | 216304_x_at          | YME1L1   | YME1-like 1 ( <i>S. cerevisiae</i> )                                                                                         |
| 360 | 212594_at            | PDCD4    | programmed cell death 4 (neoplastic transformation inhibitor)                                                                |
| 361 | 201040_at            | gnai2    | guanine nucleotide binding protein (G protein), alpha inhibiting activity polypeptide 2                                      |
| 362 | 203388_at            | arrb2    | arrestin, beta 2                                                                                                             |
| 363 | 209584_x_at          | APOBEC3C | apolipoprotein B mRNA editing enzyme, catalytic polypeptide-like 3C                                                          |
| 364 | 218963_s_at          | Krt23    | keratin 23 (histone deacetylase inducible)                                                                                   |
| 365 | 218389_s_at          | aph1a    | anterior pharynx defective 1 homolog A ( <i>C. elegans</i> )                                                                 |
| 366 | 204686_at            | IRS1     | insulin receptor substrate 1                                                                                                 |
| 367 | 222062_at            | IL27RA   | interleukin 27 receptor, alpha                                                                                               |
| 368 | 219459_at            | Polr3b   | polymerase (RNA) III (DNA directed) polypeptide B                                                                            |

|     |             |           |                                                                                             |
|-----|-------------|-----------|---------------------------------------------------------------------------------------------|
| 369 | 206548_at   | NA        | not yet annotated                                                                           |
| 370 | 215648_at   | NUDCD3    | NudC domain containing 3                                                                    |
| 371 | 209602_s_at | GATA3     | GATA binding protein 3                                                                      |
| 372 | 202617_s_at | mecp2     | methyl CpG binding protein 2 (Rett syndrome)                                                |
| 373 | 204553_x_at | INPP4A    | inositol polyphosphate-4-phosphatase, type I, 107kDa                                        |
| 374 | 220120_s_at | EPB41L4A  | erythrocyte membrane protein band 4.1 like 4A                                               |
| 375 | 218991_at   | HEATR6    | HEAT repeat containing 6                                                                    |
| 376 | 210685_s_at | Ube4b     | ubiquitination factor E4B (UFD2 homolog, yeast)                                             |
| 377 | 201206_s_at | RRBP1     | ribosome binding protein 1 homolog 180kDa (dog)                                             |
| 378 | 209403_at   | TBC1D3C   | TBC1 domain family, member 3E; TBC1 domain family, member 3F; TBC1 domain family, member 3G |
| 378 | 209403_at   | TBC1D3F   | TBC1 domain family, member 3E; TBC1 domain family, member 3F; TBC1 domain family, member 3G |
| 378 | 209403_at   | TBC1D3G   | TBC1 domain family, member 3E; TBC1 domain family, member 3F; TBC1 domain family, member 3G |
| 378 | 209403_at   | TBC1D3H   | TBC1 domain family, member 3E; TBC1 domain family, member 3F; TBC1 domain family, member 3G |
| 378 | 209403_at   | LOC653380 | TBC1 domain family, member 3E; TBC1 domain family, member 3F; TBC1 domain family, member 3G |
| 378 | 209403_at   | TBC1D3    | TBC1 domain family, member 3E; TBC1 domain family, member 3F; TBC1 domain family, member 3G |
| 378 | 209403_at   | TBC1D3B   | TBC1 domain family, member 3E; TBC1 domain family, member 3F; TBC1 domain family, member 3G |
| 379 | 210337_s_at | ACLY      | ATP citrate lyase                                                                           |
| 380 | 214973_x_at | IGHD      | immunoglobulin heavy constant delta                                                         |
| 381 | 207252_at   | INE1      | inactivation escape 1 (non-protein coding)                                                  |
| 382 | 204415_at   | IFI6      | interferon, alpha-inducible protein 6                                                       |
| 383 | 207705_s_at | NINL      | ninein-like                                                                                 |
| 384 | 204098_at   | Rbmx2     | RNA binding motif protein, X-linked 2                                                       |
| 385 | 205963_s_at | DNAJA3    | DnaJ (Hsp40) homolog, subfamily A, member 3                                                 |
| 386 | 205660_at   | OASL      | 2'-5'-oligoadenylate synthetase-like                                                        |
| 387 | 203975_s_at | CHAF1A    | chromatin assembly factor 1, subunit A (p150)                                               |
| 388 | 217170_at   | TRAV8-6   | T cell receptor alpha variable 8-6                                                          |
| 389 | 201880_at   | ARIH1     | ariadne homolog, ubiquitin-conjugating enzyme E2 binding protein, 1 (Drosophila)            |
| 390 | 218400_at   | Oas3      | 2'-5'-oligoadenylate synthetase 3, 100kDa                                                   |
| 391 | 205239_at   | AREGB     | amphiregulin; amphiregulin B                                                                |
| 391 | 205239_at   | AREG      | amphiregulin; amphiregulin B                                                                |
| 392 | 212846_at   | Rrp1b     | ribosomal RNA processing 1 homolog B (S. cerevisiae)                                        |
| 393 | 219968_at   | ZNF589    | zinc finger protein 589                                                                     |
| 394 | 209425_at   | C1qtnf3   | C1q and tumor necrosis factor related protein 3; alpha-methylacyl-CoA racemase              |
| 394 | 209425_at   | AMACR     | C1q and tumor necrosis factor related protein 3; alpha-methylacyl-CoA racemase              |
| 395 | 221169_s_at | HRH4      | histamine receptor H4                                                                       |
