# Supplementary material for: Blood transcriptomics of drug-naïve sporadic Parkinson’s disease patients
Source: PubMed Central journal article supplement (PMC4625854; doi:10.1186/s12864-015-2058-3), 2015-10-28
Supplement: 12864_2015_2058_MOESM4_ESM.pdf [file 12864_2015_2058_MOESM4_ESM.pdf]

**Additional file 4. Square of the Mahalanobis distance calculated for each sample from both the control and the pathological class models.**

|                 | <b>Control</b> | <b>Pathological</b> |
|-----------------|----------------|---------------------|
| <b>C001MB0C</b> | 1.23           | 19.10               |
| <b>C002MC0C</b> | 7.91           | 19.66               |
| <b>C003GC0C</b> | 4.35           | 33.03               |
| <b>C004GQ0C</b> | 5.10           | 27.42               |
| <b>C005MZ0C</b> | 8.05           | 46.87               |
| <b>C006ZB0C</b> | 1.48           | 17.65               |
| <b>C007MC0C</b> | 2.38           | 26.33               |
| <b>C008MB0C</b> | 2.28           | 22.25               |
| <b>C009GM0C</b> | 6.80           | 25.94               |
| <b>C011GB0C</b> | 3.60           | 30.29               |
| <b>C012IK0C</b> | 4.26           | 33.48               |
| <b>C013FB0C</b> | 4.87           | 10.45               |
| <b>C014MF0C</b> | 1.65           | 18.86               |
| <b>C015PS0C</b> | 2.64           | 21.42               |
| <b>C016BF0C</b> | 5.62           | 36.56               |
| <b>C017AS0C</b> | 9.06           | 18.65               |
| <b>C018LC0C</b> | 4.30           | 34.36               |
| <b>C019AP0C</b> | 9.01           | 25.61               |
| <b>C020MB0C</b> | 10.16          | 33.30               |
| <b>P001RS01</b> | 30.83          | 3.26                |
| <b>P002FM01</b> | 28.31          | 8.84                |
| <b>P003ZA01</b> | 14.27          | 3.39                |
| <b>P004LN01</b> | 23.04          | 4.97                |
| <b>P005PN01</b> | 21.89          | 1.16                |
| <b>P006LS01</b> | 33.78          | 5.33                |
| <b>P007US01</b> | 30.77          | 4.83                |
| <b>P009WB01</b> | 25.75          | 1.60                |
| <b>P010SK01</b> | 28.66          | 4.41                |
| <b>P011MF01</b> | 11.81          | 4.74                |
| <b>P012MB01</b> | 29.49          | 4.78                |
| <b>P013SR01</b> | 54.63          | 11.57               |
| <b>P014GS01</b> | 31.74          | 4.21                |

|                 |       |       |
|-----------------|-------|-------|
| <b>P015MS01</b> | 14.58 | 4.57  |
| <b>P016MG01</b> | 52.28 | 12.13 |
| <b>P017PB01</b> | 26.94 | 1.62  |
| <b>P018RD01</b> | 24.33 | 2.85  |
| <b>P019MT01</b> | 17.61 | 3.70  |
| <b>P020FG01</b> | 16.85 | 2.85  |
| <b>P021LK01</b> | 13.48 | 3.94  |
| <b>P022ZP01</b> | 18.79 | 1.46  |
| <b>P023PP01</b> | 29.60 | 6.57  |
| <b>P024BS01</b> | 14.68 | 1.49  |
| <b>P025FS01</b> | 22.37 | 0.41  |
| <b>P026LB01</b> | 29.87 | 2.95  |
| <b>P027MM01</b> | 18.60 | 4.78  |
| <b>P028DL01</b> | 13.11 | 8.20  |
| <b>P029EP01</b> | 18.90 | 1.98  |
| <b>P030AZ01</b> | 39.20 | 4.93  |
| <b>P031MC01</b> | 32.73 | 5.05  |
| <b>P032AS01</b> | 24.57 | 3.00  |
| <b>P033CG01</b> | 25.37 | 6.71  |
| <b>P034LM01</b> | 35.77 | 5.90  |
| <b>P035NH01</b> | 27.55 | 2.37  |
| <b>P036LL01</b> | 23.64 | 6.65  |
| <b>P037MC01</b> | 54.58 | 9.21  |
| <b>P038SS01</b> | 29.99 | 1.49  |
| <b>P039GF01</b> | 25.39 | 3.54  |
| <b>P040GG01</b> | 19.90 | 8.67  |
| <b>P041BB01</b> | 10.50 | 10.19 |
