# Supplementary material for: Blood transcriptomics of drug-naïve sporadic Parkinson’s disease patients
Source: PubMed Central journal article supplement (PMC4625854; doi:10.1186/s12864-015-2058-3), 2015-10-28
Supplement: 12864_2015_2058_MOESM5_ESM.pdf [file 12864_2015_2058_MOESM5_ESM.pdf]

**Additional file 5. Main function (GOTERM\_BP\_FAT as classified by DAVID gene ontology) altered in whole peripheral blood cells in the 395 selected variables comparing PD patients and controls.** GO annotations with at least 3 genes and  $P < 0.05$  (Fisher exact probability) are presented. Count: number of genes involved in the term; %: percentage of involved genes/total genes; P-Value: modified fisher exact P-value, EASE Score; Benjamini: adjusted P-value using Benjamini-Hochberg procedure.

| Term                                                              | Count | %    | P-Value  | Benjamini |
|-------------------------------------------------------------------|-------|------|----------|-----------|
| GO:0006333~chromatin assembly or disassembly                      | 11    | 3.05 | 3.23E-04 | 4.53E-01  |
| GO:0042981~regulation of apoptosis                                | 31    | 8.59 | 1.42E-03 | 7.34E-01  |
| GO:0043067~regulation of programmed cell death                    | 31    | 8.59 | 1.65E-03 | 6.42E-01  |
| GO:0043065~positive regulation of apoptosis                       | 20    | 5.54 | 1.72E-03 | 5.52E-01  |
| GO:0010941~regulation of cell death                               | 31    | 8.59 | 1.74E-03 | 4.77E-01  |
| GO:0044092~negative regulation of molecular function              | 17    | 4.71 | 1.75E-03 | 4.20E-01  |
| GO:0043068~positive regulation of programmed cell death           | 20    | 5.54 | 1.86E-03 | 3.91E-01  |
| GO:0010942~positive regulation of cell death                      | 20    | 5.54 | 1.96E-03 | 3.67E-01  |
| GO:0031497~chromatin assembly                                     | 8     | 2.22 | 2.24E-03 | 3.71E-01  |
| GO:0065004~protein-DNA complex assembly                           | 8     | 2.22 | 2.89E-03 | 4.17E-01  |
| GO:0034728~nucleosome organization                                | 8     | 2.22 | 3.27E-03 | 4.26E-01  |
| GO:0030098~lymphocyte differentiation                             | 8     | 2.22 | 5.74E-03 | 5.91E-01  |
| GO:0043154~negative regulation of caspase activity                | 4     | 1.11 | 5.80E-03 | 5.66E-01  |
| GO:0002521~leukocyte differentiation                              | 9     | 2.49 | 6.14E-03 | 5.60E-01  |
| GO:0043407~negative regulation of MAP kinase activity             | 5     | 1.39 | 6.44E-03 | 5.52E-01  |
| GO:0001775~cell activation                                        | 14    | 3.88 | 7.29E-03 | 5.73E-01  |
| GO:0051100~negative regulation of binding                         | 6     | 1.66 | 7.60E-03 | 5.67E-01  |
| GO:0043549~regulation of kinase activity                          | 16    | 4.43 | 8.00E-03 | 5.65E-01  |
| GO:0006334~nucleosome assembly                                    | 7     | 1.94 | 8.14E-03 | 5.51E-01  |
| GO:0007568~aging                                                  | 8     | 2.22 | 8.15E-03 | 5.34E-01  |
| GO:0046649~lymphocyte activation                                  | 11    | 3.05 | 8.96E-03 | 5.50E-01  |
| GO:0042325~regulation of phosphorylation                          | 19    | 5.26 | 8.99E-03 | 5.35E-01  |
| GO:0010466~negative regulation of peptidase activity              | 4     | 1.11 | 9.03E-03 | 5.20E-01  |
| GO:0031328~positive regulation of cellular biosynthetic process   | 25    | 6.93 | 9.04E-03 | 5.06E-01  |
| GO:0009891~positive regulation of biosynthetic process            | 25    | 6.93 | 1.07E-02 | 5.50E-01  |
| GO:0031647~regulation of protein stability                        | 5     | 1.39 | 1.11E-02 | 5.51E-01  |
| GO:0006323~DNA packaging                                          | 8     | 2.22 | 1.12E-02 | 5.42E-01  |
| GO:0030217~T cell differentiation                                 | 6     | 1.66 | 1.13E-02 | 5.32E-01  |
| GO:0051338~regulation of transferase activity                     | 16    | 4.43 | 1.15E-02 | 5.25E-01  |
| GO:0010604~positive regulation of macromolecule metabolic process | 29    | 8.03 | 1.22E-02 | 5.34E-01  |
| GO:0045321~leukocyte activation                                   | 12    | 3.32 | 1.28E-02 | 5.38E-01  |
| GO:0051174~regulation of phosphorus metabolic process             | 19    | 5.26 | 1.31E-02 | 5.37E-01  |
| GO:0019220~regulation of phosphate metabolic process              | 19    | 5.26 | 1.31E-02 | 5.37E-01  |

|                                                                                                         |    |       |          |          |
|---------------------------------------------------------------------------------------------------------|----|-------|----------|----------|
| GO:0043086~negative regulation of catalytic activity                                                    | 13 | 3.60  | 1.35E-02 | 5.35E-01 |
| GO:0010648~negative regulation of cell communication                                                    | 12 | 3.32  | 1.51E-02 | 5.65E-01 |
| GO:0016311~dephosphorylation                                                                            | 9  | 2.49  | 1.54E-02 | 5.63E-01 |
| GO:0008219~cell death                                                                                   | 25 | 6.93  | 1.55E-02 | 5.54E-01 |
| GO:0016265~death                                                                                        | 25 | 6.93  | 1.64E-02 | 5.66E-01 |
| GO:0006917~induction of apoptosis                                                                       | 14 | 3.88  | 1.68E-02 | 5.65E-01 |
| GO:0012501~programmed cell death                                                                        | 22 | 6.09  | 1.71E-02 | 5.61E-01 |
| GO:0012502~induction of programmed cell death                                                           | 14 | 3.88  | 1.73E-02 | 5.56E-01 |
| GO:0009968~negative regulation of signal transduction                                                   | 11 | 3.05  | 1.76E-02 | 5.54E-01 |
| GO:0008610~lipid biosynthetic process                                                                   | 14 | 3.88  | 1.81E-02 | 5.56E-01 |
| GO:0010557~positive regulation of macromolecule biosynthetic process                                    | 23 | 6.37  | 1.83E-02 | 5.51E-01 |
| GO:0008283~cell proliferation                                                                           | 17 | 4.71  | 2.07E-02 | 5.87E-01 |
| GO:0044242~cellular lipid catabolic process                                                             | 6  | 1.66  | 2.11E-02 | 5.87E-01 |
| GO:0006470~protein amino acid dephosphorylation                                                         | 8  | 2.22  | 2.14E-02 | 5.83E-01 |
| GO:0043392~negative regulation of DNA binding                                                           | 5  | 1.39  | 2.15E-02 | 5.77E-01 |
| GO:0045934~negative regulation of nucleobase, nucleoside, nucleotide and nucleic acid metabolic process | 19 | 5.26  | 2.17E-02 | 5.74E-01 |
| GO:0042127~regulation of cell proliferation                                                             | 26 | 7.20  | 2.37E-02 | 5.99E-01 |
| GO:0051172~negative regulation of nitrogen compound metabolic process                                   | 19 | 5.26  | 2.42E-02 | 5.99E-01 |
| GO:0019637~organophosphate metabolic process                                                            | 10 | 2.77  | 2.45E-02 | 5.96E-01 |
| GO:0051276~chromosome organization                                                                      | 18 | 4.99  | 2.57E-02 | 6.07E-01 |
| GO:0008202~steroid metabolic process                                                                    | 10 | 2.77  | 2.59E-02 | 6.03E-01 |
| GO:0007167~enzyme linked receptor protein signaling pathway                                             | 14 | 3.88  | 2.73E-02 | 6.15E-01 |
| GO:0006325~chromatin organization                                                                       | 15 | 4.16  | 2.75E-02 | 6.12E-01 |
| GO:0043405~regulation of MAP kinase activity                                                            | 8  | 2.22  | 2.83E-02 | 6.15E-01 |
| GO:0051173~positive regulation of nitrogen compound metabolic process                                   | 22 | 6.09  | 2.88E-02 | 6.15E-01 |
| GO:0048384~retinoic acid receptor signaling pathway                                                     | 3  | 0.83  | 2.90E-02 | 6.12E-01 |
| GO:0051252~regulation of RNA metabolic process                                                          | 50 | 13.85 | 3.25E-02 | 6.48E-01 |
| GO:0006007~glucose catabolic process                                                                    | 5  | 1.39  | 3.26E-02 | 6.43E-01 |
| GO:0010608~posttranscriptional regulation of gene expression                                            | 10 | 2.77  | 3.30E-02 | 6.41E-01 |
| GO:0010605~negative regulation of macromolecule metabolic process                                       | 24 | 6.65  | 3.30E-02 | 6.35E-01 |
| GO:0043631~RNA polyadenylation                                                                          | 3  | 0.83  | 3.34E-02 | 6.34E-01 |
| GO:0007049~cell cycle                                                                                   | 25 | 6.93  | 3.42E-02 | 6.37E-01 |
| GO:0006469~negative regulation of protein kinase activity                                               | 6  | 1.66  | 3.52E-02 | 6.42E-01 |
| GO:0010906~regulation of glucose metabolic process                                                      | 4  | 1.11  | 3.59E-02 | 6.44E-01 |
| GO:0045935~positive regulation of nucleobase, nucleoside, nucleotide and nucleic acid metabolic process | 21 | 5.82  | 3.74E-02 | 6.54E-01 |
| GO:0006396~RNA processing                                                                               | 19 | 5.26  | 3.77E-02 | 6.51E-01 |
| GO:0033673~negative regulation of kinase activity                                                       | 6  | 1.66  | 3.99E-02 | 6.67E-01 |
| GO:0006006~glucose metabolic process                                                                    | 8  | 2.22  | 4.13E-02 | 6.74E-01 |

|                                                                  |    |      |          |          |
|------------------------------------------------------------------|----|------|----------|----------|
| GO:0001959~regulation of cytokine-mediated signaling pathway     | 3  | 0.83 | 4.29E-02 | 6.83E-01 |
| GO:0008203~cholesterol metabolic process                         | 6  | 1.66 | 4.31E-02 | 6.81E-01 |
| GO:0010675~regulation of cellular carbohydrate metabolic process | 4  | 1.11 | 4.42E-02 | 6.85E-01 |
| GO:0048534~hemopoietic or lymphoid organ development             | 11 | 3.05 | 4.62E-02 | 6.96E-01 |
| GO:0006644~phospholipid metabolic process                        | 9  | 2.49 | 4.64E-02 | 6.93E-01 |
| GO:0016071~mRNA metabolic process                                | 14 | 3.88 | 4.65E-02 | 6.89E-01 |
| GO:0006109~regulation of carbohydrate metabolic process          | 4  | 1.11 | 4.72E-02 | 6.90E-01 |
| GO:0006915~apoptosis                                             | 20 | 5.54 | 4.75E-02 | 6.88E-01 |
| GO:0045941~positive regulation of transcription                  | 19 | 5.26 | 4.85E-02 | 6.91E-01 |
| GO:0009123~nucleoside monophosphate metabolic process            | 5  | 1.39 | 4.87E-02 | 6.88E-01 |
