# Supplementary material for: Blood transcriptomics of drug-naïve sporadic Parkinson’s disease patients
Source: PubMed Central journal article supplement (PMC4625854; doi:10.1186/s12864-015-2058-3), 2015-10-28
Supplement: 12864_2015_2058_MOESM6_ESM.pdf [file 12864_2015_2058_MOESM6_ESM.pdf]

**Additional file 6. List of differentially expressed genes between PD patients and controls based on PUMA.** Ratios are calculated as differences in gene expression between samples of PD patients and controls, with the top up-regulated genes first.

| Affymetrix probe ID | Gene name                                                                                                                 | Gene symbol           | Fold change (LOG2) | p-Values    |
|---------------------|---------------------------------------------------------------------------------------------------------------------------|-----------------------|--------------------|-------------|
| 209715_at           | chromobox homolog 5 (HP1 alpha homolog, Drosophila)                                                                       | CBX5                  | -0.466356561       | 5.66874E-08 |
| 214770_at           | macrophage scavenger receptor 1                                                                                           | MSR1                  | 1.155707168        | 1.03419E-06 |
| 216168_at           | not yet annotated                                                                                                         | NA                    | -0.877227057       | 1.28714E-05 |
| 204621_s_at         | nuclear receptor subfamily 4, group A, member 2                                                                           | NR4A2                 | 0.604488377        | 1.84149E-05 |
| 209719_x_at         | serpin peptidase inhibitor, clade B (ovalbumin), member 3                                                                 | SERPINB3              | 0.947560037        | 2.56296E-05 |
| 214487_s_at         | RAP2A, member of RAS oncogene family /// RAP2B, member of RAS oncogene family                                             | RAP2A /// RAP2B       | 0.801631943        | 3.72848E-05 |
| 207652_s_at         | chemokine-like receptor 1                                                                                                 | CMKLR1                | 0.471898613        | 5.14479E-05 |
| 208342_x_at         | chorionic somatomammotropin hormone 1 (placental lactogen) /// chorionic somatomammotropin hormone 2 /// growth hormone 1 | CSH1 /// CSH2 /// GH1 | -1.00448384        | 6.56904E-05 |
| 208893_s_at         | dual specificity phosphatase 6                                                                                            | DUSP6                 | 0.453386791        | 7.4754E-05  |
| 210085_s_at         | annexin A9                                                                                                                | ANXA9                 | -1.14117166        | 8.53377E-05 |
| 209153_s_at         | transcription factor 3 (E2A immunoglobulin enhancer binding factors E12/E47)                                              | TCF3                  | -0.328005864       | 8.6175E-05  |
| 206466_at           | acyl-CoA synthetase bubblegum family member 1                                                                             | ACSBG1                | -0.476174167       | 0.000100777 |
| 203645_s_at         | CD163 molecule                                                                                                            | CD163                 | 0.335349142        | 0.000103353 |
| 213006_at           | CCAAT/enhancer binding protein (C/EBP), delta                                                                             | CEBPD                 | 0.394699181        | 0.000127742 |
| 203658_at           | solute carrier family 25 (carnitine/acylcarnitine translocase), member 20                                                 | SLC25A20              | 0.338656917        | 0.00013186  |
| 214015_at           | suppressor of cytokine signaling 7                                                                                        | SOCS7                 | 0.934011822        | 0.00013723  |
| 218906_x_at         | kinesin light chain 2                                                                                                     | KLC2                  | -0.547975676       | 0.000179074 |
| 214921_at           | potassium large conductance calcium-activated channel, subfamily M, alpha member 1                                        | KCNMA1                | 0.907252494        | 0.000186009 |
| 202436_s_at         | cytochrome P450, family 1, subfamily B, polypeptide 1                                                                     | CYP1B1                | 0.528002989        | 0.000197309 |
| 202170_s_at         | aminoadipate-semialdehyde dehydrogenase-phosphopantetheinyl transferase                                                   | AASDHPPT              | -0.200729462       | 0.000217083 |
| 209226_s_at         | transportin 1                                                                                                             | TNPO1                 | 0.146621612        | 0.000226022 |
| 202570_s_at         | discs, large (Drosophila) homolog-associated protein 4                                                                    | DLGAP4                | 0.329113612        | 0.0002271   |
| 201085_s_at         | SON DNA binding protein                                                                                                   | SON                   | 0.234788726        | 0.000228818 |
| 204530_s_at         | thymocyte selection-associated high mobility group box                                                                    | TOX                   | 0.364166554        | 0.000241607 |
| 215151_at           | dedicator of cytokinesis 10                                                                                               | DOCK10                | -0.303841791       | 0.000247385 |

|             |                                                                                                      |          |              |             |
|-------------|------------------------------------------------------------------------------------------------------|----------|--------------|-------------|
| 221592_at   | TBC1 domain family, member 8 (with GRAM domain)                                                      | TBC1D8   | 0.352432876  | 0.000247568 |
| 206720_at   | mannosyl (alpha-1,6-)-glycoprotein beta-1,6-N-acetylglucosaminyltransferase                          | MGAT5    | 0.841171889  | 0.000254123 |
| 219025_at   | CD248 molecule, endosialin                                                                           | CD248    | -1.116191982 | 0.00028425  |
| 214180_at   | mannosidase, alpha, class 1C, member 1                                                               | MAN1C1   | -0.454728243 | 0.000295329 |
| 212562_s_at | Cathepsin Z precursor (CTSZ)                                                                         | CTSZ     | 0.385954838  | 0.000301618 |
| 204484_at   | phosphoinositide-3-kinase, class 2, beta polypeptide                                                 | PIK3C2B  | -0.371678816 | 0.000339617 |
| 213435_at   | SATB homeobox 2                                                                                      | SATB2    | 0.66594766   | 0.000365439 |
| 221583_s_at | potassium large conductance calcium-activated channel, subfamily M, alpha member 1                   | KCNMA1   | 0.720391303  | 0.000372464 |
| 211528_x_at | major histocompatibility complex, class I, G                                                         | HLA-G    | 0.260269689  | 0.000389438 |
| 210607_at   | fms-related tyrosine kinase 3 ligand                                                                 | FLT3LG   | -0.432410714 | 0.000397135 |
| 221648_s_at | not yet annotated                                                                                    | NA       | -0.332140054 | 0.000408087 |
| 205594_at   | zinc finger protein 652                                                                              | ZNF652   | -0.498121115 | 0.000419955 |
| 211529_x_at | major histocompatibility complex, class I, G                                                         | HLA-G    | 0.285387853  | 0.00046583  |
| 211689_s_at | transmembrane protease, serine 2                                                                     | TMPRSS2  | 0.82754955   | 0.000488075 |
| 205530_at   | electron-transferring-flavoprotein dehydrogenase                                                     | ETFDH    | 0.245452971  | 0.000493292 |
| 201013_s_at | phosphoribosylaminoimidazole carboxylase, phosphoribosylaminoimidazole succinocarboxamide synthetase | PAICS    | -0.20799853  | 0.000498347 |
| 210847_x_at | tumor necrosis factor receptor superfamily, member 25                                                | TNFRSF25 | -0.333481749 | 0.000503277 |
| 220650_s_at | solute carrier family 9 (sodium/hydrogen exchanger), member 5                                        | SLC9A5   | -0.717043099 | 0.000525664 |
| 203548_s_at | lipoprotein lipase                                                                                   | LPL      | 0.695863327  | 0.000616339 |
| 214739_at   | leucine-rich repeats and calponin homology (CH) domain containing 3                                  | LRCH3    | -0.232108596 | 0.000625629 |
| 212996_s_at | URB1 ribosome biogenesis 1 homolog ( <i>S. cerevisiae</i> )                                          | URB1     | -0.312788713 | 0.000625819 |
| 212659_s_at | interleukin 1 receptor antagonist                                                                    | IL1RN    | 0.48822024   | 0.000721395 |
| 208250_s_at | deleted in malignant brain tumors 1                                                                  | DMBT1    | 0.641287515  | 0.000736787 |
| 208423_s_at | macrophage scavenger receptor 1                                                                      | MSR1     | 0.517802645  | 0.000761855 |
| 215295_at   | dystrobrevin, beta                                                                                   | DTNB     | -0.849038676 | 0.000778437 |
| 207990_x_at | acrosomal vesicle protein 1                                                                          | ACRV1    | 0.625356194  | 0.000853422 |
| 213666_at   | septin 6                                                                                             | SEPT6    | -0.275134841 | 0.000853423 |
| 201340_s_at | ectodermal-neural cortex (with BTB-like domain)                                                      | ENC1     | 0.626294754  | 0.000877435 |
| 217647_at   | not yet annotated                                                                                    | NA       | -0.439387628 | 0.000944701 |
| 215049_x_at | CD163 molecule                                                                                       | CD163    | 0.279963425  | 0.000956214 |
| 215726_s_at | cytochrome b5 type A (microsomal)                                                                    | CYB5A    | -0.266627132 | 0.000976392 |
| 215750_at   | KIAA1659 protein                                                                                     | KIAA1659 | -0.397790885 | 0.000985982 |

|             |                                                                                        |           |              |             |
|-------------|----------------------------------------------------------------------------------------|-----------|--------------|-------------|
| 202052_s_at | retinoic acid induced 14                                                               | RAI14     | -0.90848263  | 0.000991565 |
| 214468_at   | myosin, heavy chain 6, cardiac muscle, alpha                                           | MYH6      | 0.778105799  | 0.001036691 |
| 202689_at   | RNA binding motif protein 15B                                                          | RBM15B    | 0.162810206  | 0.001039642 |
| 217152_at   | not yet annotated                                                                      | NA        | -0.256231878 | 0.001052851 |
| 221146_at   | not yet annotated                                                                      | NA        | -0.544325116 | 0.001055778 |
| 202617_s_at | methyl CpG binding protein 2 (Rett syndrome)                                           | MECP2     | 0.165387492  | 0.001082264 |
| 220609_at   | hypothetical protein LOC202181                                                         | LOC202181 | -0.255993832 | 0.001110672 |
| 218693_at   | tetraspanin 15                                                                         | TSPAN15   | -0.48276688  | 0.00111286  |
| 210318_at   | retinol binding protein 3, interstitial                                                | RBP3      | -0.833439145 | 0.001123025 |
| 204027_s_at | methyltransferase like 1                                                               | METTL1    | -0.276513299 | 0.001125912 |
| 219496_at   | ankyrin repeat domain 57                                                               | ANKRD57   | 0.669761984  | 0.001132405 |
| 207339_s_at | lymphotoxin beta (TNF superfamily, member 3)                                           | LTB       | -0.291010536 | 0.001148496 |
| 203788_s_at | sema domain, immunoglobulin domain (Ig), short basic domain, secreted, (semaphorin) 3C | SEMA3C    | 0.396970511  | 0.001189937 |
| 218676_s_at | phosphatidylcholine transfer protein                                                   | PCTP      | 0.23107584   | 0.001200463 |
| 219671_at   | hippocalcin like 4                                                                     | HPCAL4    | -0.450659118 | 0.001216453 |
| 201203_s_at | ribosome binding protein 1 homolog 180kDa (dog)                                        | RRBP1     | 1.128271592  | 0.001238956 |
| 206618_at   | interleukin 18 receptor 1                                                              | IL18R1    | 0.438266711  | 0.001285442 |
| 203630_s_at | component of oligomeric golgi complex 5                                                | COG5      | -0.323793923 | 0.001287931 |
| 216227_at   | HLA complex group 2 pseudogene 7                                                       | HCG2P7    | 0.597749177  | 0.00130013  |
| 33494_at    | electron-transferring-flavoprotein dehydrogenase                                       | ETFDH     | 0.206783093  | 0.001313642 |
| 218754_at   | nucleolar protein 9                                                                    | NOL9      | -0.197077728 | 0.001319467 |
| 205491_s_at | gap junction protein, beta 3, 31kDa                                                    | GJB3      | 0.732235161  | 0.001325795 |
| 218273_s_at | protein phosphatase 2C, magnesium-dependent, catalytic subunit                         | PPM2C     | 0.304076084  | 0.00134614  |
| 210475_at   | POU class 3 homeobox 1                                                                 | POU3F1    | -0.684792024 | 0.001380041 |
| 218675_at   | solute carrier family 22, member 17                                                    | SLC22A17  | -1.062766292 | 0.001385286 |
| 206260_at   | transglutaminase 4 (prostate)                                                          | TGM4      | -0.609864058 | 0.001394993 |
| 218899_s_at | brain and acute leukemia, cytoplasmic                                                  | BAALC     | -0.481385196 | 0.001423021 |
| 202658_at   | peroxisomal biogenesis factor 11 beta                                                  | PEX11B    | -0.165482477 | 0.001430496 |
| 214500_at   | H2A histone family, member Y                                                           | H2AFY     | 0.312225257  | 0.00143456  |
| 212186_at   | acetyl-Coenzyme A carboxylase alpha                                                    | ACACA     | -0.216541587 | 0.001462758 |
| 206674_at   | fms-related tyrosine kinase 3                                                          | FLT3      | 0.354349815  | 0.001493866 |
| 216945_x_at | PAS domain containing serine/threonine kinase                                          | PASK      | -0.337753651 | 0.001511612 |
| 214661_s_at | NOPI4 nucleolar protein homolog (yeast)                                                | NOPI4     | -0.229819539 | 0.001565629 |

|             |                                                                                                                                                       |                |              |             |
|-------------|-------------------------------------------------------------------------------------------------------------------------------------------------------|----------------|--------------|-------------|
| 39705_at    | SIN3 homolog B, transcription regulator (yeast)                                                                                                       | SIN3B          | -0.262877794 | 0.001580746 |
| 216964_at   | Ubiquitin specific peptidase 22, mRNA (cDNA clone IMAGE:3629270)                                                                                      | USP22          | -0.378087818 | 0.001607975 |
| 217450_at   | similar to insulin receptor substrate like protein                                                                                                    | LOC442715      | 0.694830012  | 0.001630985 |
| 216531_at   | YY2 transcription factor                                                                                                                              | YY2            | 0.354964955  | 0.001705508 |
| 213159_at   | pecanex homolog (Drosophila)                                                                                                                          | PCNX           | 0.225181822  | 0.001718209 |
| 215349_at   | HCG1730474, mRNA (cDNA clone MGC:189748 IMAGE:9057072)                                                                                                | hCG_1730474    | -0.315653202 | 0.001726704 |
| 211310_at   | enhancer of zeste homolog 1 (Drosophila)                                                                                                              | EZH1           | -0.344283389 | 0.001732969 |
| 221649_s_at | peter pan homolog (Drosophila)                                                                                                                        | PPAN           | -0.292142942 | 0.00175623  |
| 211591_s_at | phosphodiesterase 4A, cAMP-specific (phosphodiesterase E2 dunce homolog, Drosophila)                                                                  | PDE4A          | -0.754059002 | 0.001768511 |
| 217168_s_at | homocysteine-inducible, endoplasmic reticulum stress-inducible, ubiquitin-like domain member 1                                                        | HERPUD1        | 0.142395055  | 0.00178268  |
| 202643_s_at | tumor necrosis factor, alpha-induced protein 3                                                                                                        | TNFAIP3        | 0.214012268  | 0.001796675 |
| 215646_s_at | versican                                                                                                                                              | VCAN           | 0.427562571  | 0.001805152 |
| 205129_at   | nucleophosmin/nucleoplasmin, 3                                                                                                                        | NPM3           | -0.2679823   | 0.001891157 |
| 214997_at   | CDNA clone IMAGE:5285458                                                                                                                              | GOLGA1         | -0.339527541 | 0.001901639 |
| 31637_s_at  | nuclear receptor subfamily 1, group D, member 1 /// thyroid hormone receptor, alpha (erythroblastic leukemia viral (v-erb-a) oncogene homolog, avian) | NR1D1 /// THRA | -0.368157253 | 0.001969414 |
| 220652_at   | kinesin family member 24                                                                                                                              | KIF24          | 0.530692715  | 0.00202485  |
| 212831_at   | multiple EGF-like-domains 9                                                                                                                           | MEGF9          | 0.26530666   | 0.002032823 |
| 217645_at   | COX16 cytochrome c oxidase assembly homolog (S. cerevisiae)                                                                                           | COX16          | -0.300039031 | 0.002045937 |
| 219882_at   | tubulin tyrosine ligase-like family, member 7                                                                                                         | TTLL7          | 0.656157914  | 0.002062414 |
| 208241_at   | neuregulin 1                                                                                                                                          | NRG1           | 0.803389569  | 0.002129758 |
| 216624_s_at | myeloid/lymphoid or mixed-lineage leukemia (trithorax homolog, Drosophila)                                                                            | MLL            | 0.774520202  | 0.002164031 |
| 208978_at   | cysteine-rich protein 2                                                                                                                               | CRIP2          | -0.938311947 | 0.002183632 |
| 200965_s_at | actin binding LIM protein 1                                                                                                                           | ABLIM1         | -0.224575067 | 0.002250916 |
| 208895_s_at | DEAD (Asp-Glu-Ala-Asp) box polypeptide 18                                                                                                             | DDX18          | -0.204418024 | 0.002287737 |
| 204555_s_at | protein phosphatase 1, regulatory (inhibitor) subunit 3D                                                                                              | PPP1R3D        | 0.424983905  | 0.002346258 |
| 212162_at   | kinase D-interacting substrate, 220kDa                                                                                                                | KIDINS220      | 0.232692954  | 0.002391666 |
| 214103_s_at | RAP2A, member of RAS oncogene family, mRNA (cDNA clone MGC:41795 IMAGE:5278625)                                                                       | RAP2A          | 0.600783638  | 0.002409283 |
| 203549_s_at | lipoprotein lipase                                                                                                                                    | LPL            | 0.705629582  | 0.002462286 |
| 201221_s_at | small nuclear ribonucleoprotein 70kDa (U1)                                                                                                            | SNRNP70        | -0.3146288   | 0.002473321 |

|             |                                                                                                                        |                                     |              |             |
|-------------|------------------------------------------------------------------------------------------------------------------------|-------------------------------------|--------------|-------------|
| 221968_s_at | Zinc finger protein 771 (ZNF771), transcript variant 2, mRNA                                                           | ZNF771                              | -0.933094787 | 0.002504067 |
| 220295_x_at | DEP domain containing 1                                                                                                | DEPDC1                              | 0.354859202  | 0.002518822 |
| 203825_at   | bromodomain containing 3                                                                                               | BRD3                                | -0.278761111 | 0.002575541 |
| 201677_at   | Clone 23837 mRNA sequence                                                                                              | C3orf37                             | -0.175528882 | 0.002650468 |
| 201396_s_at | small glutamine-rich tetratricopeptide repeat (TPR)-containing, alpha                                                  | SGTA                                | -0.293906954 | 0.002664609 |
| 220068_at   | pre-B lymphocyte 3                                                                                                     | VPREB3                              | -0.468239933 | 0.002679446 |
| 213963_s_at | Sin3A-associated protein, 30kDa, mRNA (cDNA clone MGC:13685 IMAGE:4074154)                                             | SAP30                               | 0.358965223  | 0.002763904 |
| 220818_s_at | transient receptor potential cation channel, subfamily C, member 4                                                     | TRPC4                               | 0.660067978  | 0.002783459 |
| 213534_s_at | PAS domain containing serine/threonine kinase                                                                          | PASK                                | -0.357270414 | 0.002789842 |
| 218670_at   | pseudouridylate synthase 1                                                                                             | PUS1                                | -0.302994779 | 0.002821509 |
| 207445_s_at | chemokine (C-C motif) receptor 9                                                                                       | CCR9                                | -0.485330289 | 0.002846486 |
| 207995_s_at | C-type lectin domain family 4, member M                                                                                | CLEC4M                              | 0.591580309  | 0.002930408 |
| 202864_s_at | SP100 nuclear antigen                                                                                                  | SP100                               | 0.186197954  | 0.002966928 |
| 220354_at   | similar to hCG1774568                                                                                                  | hCG_1774568                         | -0.572523498 | 0.002997815 |
| 222348_at   | KIAA0303 gene                                                                                                          | MAST4                               | -0.27403997  | 0.003000198 |
| 214309_s_at | not yet annotated                                                                                                      | NA                                  | -0.34054797  | 0.003023758 |
| 212400_at   | family with sequence similarity 102, member A                                                                          | FAM102A                             | -0.265637996 | 0.003038778 |
| 206428_s_at | zinc finger protein 143                                                                                                | ZNF143                              | 0.610233111  | 0.003051507 |
| 202435_s_at | cytochrome P450, family 1, subfamily B, polypeptide 1                                                                  | CYP1B1                              | 0.425163769  | 0.003173176 |
| 207103_at   | potassium voltage-gated channel, Shal-related subfamily, member 2                                                      | KCND2                               | 0.512669239  | 0.003218315 |
| 217275_at   | testis-specific serine kinase 2                                                                                        | TSSK2                               | 0.76170441   | 0.003252926 |
| 216219_at   | aquaporin 6, kidney specific                                                                                           | AQP6                                | 0.416107628  | 0.003273055 |
| 207190_at   | zinc finger, ZZ-type with EF-hand domain 1                                                                             | ZZEF1                               | 0.169781547  | 0.003294357 |
| 219315_s_at | transmembrane protein 204                                                                                              | TMEM204                             | -0.339640135 | 0.003303077 |
| 212142_at   | minichromosome maintenance complex component 4                                                                         | MCM4                                | 0.946242543  | 0.003305126 |
| 204610_s_at | coiled-coil domain containing 85B                                                                                      | CCDC85B                             | -0.325985406 | 0.003305389 |
| 209197_at   | synaptotagmin XI                                                                                                       | SYT11                               | 0.206494795  | 0.003374913 |
| 211715_s_at | 3-hydroxybutyrate dehydrogenase, type 1                                                                                | BDH1                                | -0.281854344 | 0.003378891 |
| 211648_at   | immunoglobulin heavy constant alpha 1 /// immunoglobulin heavy constant gamma 1 (G1m marker) /// similar to hCG1773549 | IGHA1 /// IGHG1<br>/// LOC100133862 | -0.530825606 | 0.003379971 |
| 203996_s_at | chromosome 21 open reading frame 2                                                                                     | C21orf2                             | -0.286726183 | 0.003423145 |

|             |                                                              |          |              |             |
|-------------|--------------------------------------------------------------|----------|--------------|-------------|
| 210042_s_at | cathepsin Z                                                  | CTSZ     | 0.279771021  | 0.003444137 |
| 210251_s_at | RUN and FYVE domain containing 3                             | RUFY3    | 0.201019286  | 0.003459629 |
| 64942_at    | G protein-coupled receptor 153                               | GPR153   | 0.266278797  | 0.003479779 |
| 211680_at   | PDZ and LIM domain 5                                         | PDLIM5   | -0.396531642 | 0.003498029 |
| 213804_at   | inositol polyphosphate-5-phosphatase, 75kDa                  | INPP5B   | -0.336355767 | 0.003499911 |
| 219423_x_at | tumor necrosis factor receptor superfamily, member 25        | TNFRSF25 | -0.268879203 | 0.003584038 |
| 213674_x_at | immunoglobulin heavy constant delta                          | IGHD     | -0.533605489 | 0.003584432 |
| 220383_at   | ATP-binding cassette, sub-family G (WHITE), member 5         | ABCG5    | 0.635660741  | 0.003756643 |
| 206226_at   | histidine-rich glycoprotein                                  | HRG      | 0.626045518  | 0.003794371 |
| 215346_at   | CD40 molecule, TNF receptor superfamily member 5             | CD40     | -0.28989747  | 0.003884121 |
| 201041_s_at | dual specificity phosphatase 1                               | DUSP1    | 0.220084077  | 0.003955571 |
| 206100_at   | carboxypeptidase M                                           | CPM      | 0.345007902  | 0.003965472 |
| 219803_at   | angiopoietin-like 3                                          | ANGPTL3  | 0.543288722  | 0.004076861 |
| 204527_at   | myosin VA (heavy chain 12, myosin)                           | MYO5A    | 0.201004588  | 0.004103067 |
| 209558_s_at | huntingtin interacting protein 1 related                     | HIP1R    | -0.372127988 | 0.004112271 |
| 204581_at   | CD22 molecule                                                | CD22     | -0.419367055 | 0.004132178 |
| 220215_at   | zinc finger protein 669                                      | ZNF669   | -0.183876496 | 0.004157883 |
| 208620_at   | poly(rC) binding protein 1                                   | PCBP1    | 0.161605136  | 0.004160509 |
| 206806_at   | diacylglycerol kinase, iota                                  | DGKI     | 0.510941137  | 0.004232878 |
| 220843_s_at | WD repeats and SOF1 domain containing                        | WDSOF1   | 0.323285245  | 0.004237266 |
| 212794_s_at | KIAA1033                                                     | KIAA1033 | 0.1395113    | 0.004238224 |
| 207468_s_at | secreted frizzled-related protein 5                          | SFRP5    | -0.873636533 | 0.004315849 |
| 207630_s_at | cAMP responsive element modulator                            | CREM     | 0.258012321  | 0.004343762 |
| 207078_at   | mediator complex subunit 6                                   | MED6     | -0.261673531 | 0.004404355 |
| 208537_at   | sphingosine-1-phosphate receptor 2                           | S1PR2    | 0.662172135  | 0.004500845 |
| 208317_at   | xylulokinase homolog (H. influenzae)                         | XYLB     | -0.473168793 | 0.004514817 |
| 217466_x_at | ribosomal protein S2                                         | RPS2     | -0.207198853 | 0.004517758 |
| 217170_at   | not yet annotated                                            | NA       | -0.402411624 | 0.004520679 |
| 216723_at   | not yet annotated                                            | NA       | 0.58776772   | 0.004571784 |
| 213639_s_at | zinc finger protein 500                                      | ZNF500   | -0.189088168 | 0.004608711 |
| 222323_at   | not yet annotated                                            | NA       | 0.596033631  | 0.004639537 |
| 212357_at   | family with sequence similarity 168, member A                | FAM168A  | 0.191133998  | 0.004661274 |
| 209789_at   | coronin, actin binding protein, 2B                           | CORO2B   | -0.695919622 | 0.004741575 |
| 211914_x_at | neurofibromin 1                                              | NF1      | 0.321772784  | 0.004743772 |
| 209871_s_at | amyloid beta (A4)precursor protein-binding, family A,member2 | APBA2    | -0.349285391 | 0.00477428  |

|             |                                                                                                                                                                                                        |                                                                               |              |             |
|-------------|--------------------------------------------------------------------------------------------------------------------------------------------------------------------------------------------------------|-------------------------------------------------------------------------------|--------------|-------------|
| 218991_at   | HEAT repeat containing 6                                                                                                                                                                               | HEATR6                                                                        | 0.19490177   | 0.004788041 |
| 215390_at   | not yet annotated                                                                                                                                                                                      | NA                                                                            | -0.541438574 | 0.004788452 |
| 212053_at   | pyridoxal-dependent decarboxylase domain containing 1                                                                                                                                                  | PDXDC1                                                                        | 0.113427359  | 0.004833681 |
| 222027_at   | CDNA clone IMAGE:4513453                                                                                                                                                                               | NUCKS1                                                                        | -0.254979345 | 0.004939806 |
| 205254_x_at | transcription factor 7 (T-cell specific, HMG-box)                                                                                                                                                      | TCF7                                                                          | -0.289171917 | 0.004978627 |
| 206307_s_at | forkhead box D1                                                                                                                                                                                        | FOXD1                                                                         | 0.572579113  | 0.005056677 |
| 222048_at   | crystallin, beta B2 pseudogene 1                                                                                                                                                                       | CRYBB2P1                                                                      | -0.253002717 | 0.005145509 |
| 215323_at   | leucine zipper protein 2                                                                                                                                                                               | LUZP2                                                                         | 0.591641403  | 0.005166825 |
| 208903_at   | ribosomal protein S28                                                                                                                                                                                  | RPS28                                                                         | -0.194196541 | 0.005182963 |
| 219846_at   | gon-4-like (C. elegans)                                                                                                                                                                                | GON4L                                                                         | -0.360815723 | 0.005206435 |
| 212715_s_at | microtubule associated monooxygenase, calponin and LIM domain containing 3                                                                                                                             | MICAL3                                                                        | -0.239217707 | 0.005253409 |
| 206413_s_at | T-cell leukemia/lymphoma 1B /// T-cell leukemia/lymphoma 6                                                                                                                                             | TCL1B /// TCL6                                                                | -0.550765999 | 0.005254097 |
| 222031_at   | hypothetical protein LOC286434 /// similar to Serine/threonine-protein kinase PRKX (Protein kinase PKX1) /// hypothetical protein LOC441528 /// similar to hCG1981372 /// similar to LOC389906 protein | LOC286434 ///<br>LOC389906 ///<br>LOC441528 ///<br>LOC728687 ///<br>LOC729162 | -0.318611865 | 0.005435773 |
| 213834_at   | IQ motif and Sec7 domain 3 /// similar to IQ motif and Sec7 domain-containing protein 3 /// similar to IQ motif and Sec7 domain 3                                                                      | IQSEC3 ///<br>LOC100134209 ///<br>LOC731035                                   | -0.735086065 | 0.005501547 |
| 220349_s_at | endo-beta-N-acetylglucosaminidase                                                                                                                                                                      | FLJ21865                                                                      | -0.223275359 | 0.005546515 |
| 220618_s_at | zinc finger, CW type with PWWP domain 1                                                                                                                                                                | ZCWPW1                                                                        | -0.209039313 | 0.00560885  |
| 211571_s_at | versican                                                                                                                                                                                               | VCAN                                                                          | 0.381173514  | 0.005617021 |
| 204762_s_at | guanine nucleotide binding protein (G protein), alpha activating activity polypeptide O                                                                                                                | GNAO1                                                                         | 0.285308185  | 0.005641332 |
| 213335_s_at | ST3 beta-galactoside alpha-2,3-sialyltransferase 6                                                                                                                                                     | ST3GAL6                                                                       | 0.247035772  | 0.005658616 |
| 206427_s_at | melan-A                                                                                                                                                                                                | MLANA                                                                         | 0.27287048   | 0.005659764 |
| 206074_s_at | high mobility group AT-hook 1                                                                                                                                                                          | HMGAI                                                                         | -0.230716771 | 0.005667789 |
| 212935_at   | MCF.2 cell line derived transforming sequence-like                                                                                                                                                     | MCF2L                                                                         | -0.399163398 | 0.005743264 |
| 221101_at   | chromosome 14 open reading frame 113                                                                                                                                                                   | C14orf113                                                                     | -0.628612237 | 0.005756916 |
| 214083_at   | hypothetical protein LOC100132532                                                                                                                                                                      | LOC100132532                                                                  | -0.180920239 | 0.005767622 |
| 209245_s_at | kinesin family member 1C                                                                                                                                                                               | KIF1C                                                                         | -0.542430857 | 0.005885563 |
| 222141_at   | kelch-like 22 (Drosophila)                                                                                                                                                                             | KLHL22                                                                        | -0.229908614 | 0.005904523 |
| 210514_x_at | major histocompatibility complex, class I, G                                                                                                                                                           | HLA-G                                                                         | 0.232489798  | 0.005993239 |
| 212210_at   | integrator complex subunit 1                                                                                                                                                                           | INTS1                                                                         | 0.737172414  | 0.005993643 |

|             |                                                                    |                       |              |             |
|-------------|--------------------------------------------------------------------|-----------------------|--------------|-------------|
| 206761_at   | CD96 molecule                                                      | CD96                  | -0.317799185 | 0.005999151 |
| 205789_at   | CD1d molecule                                                      | CD1D                  | 0.214021289  | 0.006000346 |
| 210350_x_at | inhibitor of growth family, member 1                               | ING1                  | 0.35863245   | 0.006010631 |
| 207274_at   | cholinergic receptor, nicotinic, epsilon                           | CHRNE                 | 0.291246084  | 0.006023634 |
| 203716_s_at | dipeptidyl-peptidase 4                                             | DPP4                  | -0.228421293 | 0.006060235 |
| 217539_at   | chromosome 18 open reading frame 25                                | C18orf25              | -0.326483672 | 0.006061989 |
| 214217_at   | glutamate receptor, metabotropic 5                                 | GRM5                  | -0.614134196 | 0.006063128 |
| 220085_at   | helicase, lymphoid-specific                                        | HELLS                 | -0.34642368  | 0.006100818 |
| 214875_x_at | amyloid beta (A4) precursor-like protein 2                         | APLP2                 | 0.227399027  | 0.006115735 |
| 203127_s_at | serine palmitoyltransferase, long chain base subunit 2             | SPTLC2                | 0.217472996  | 0.006171437 |
| 221261_x_at | melanoma antigen family D, 4 /// melanoma antigen family D, 4B     | MAGED4 ///<br>MAGED4B | -0.322204558 | 0.006287221 |
| 216997_x_at | transducin-like enhancer of split 4 (E(sp1) homolog, Drosophila)   | TLE4                  | 0.28446533   | 0.006431176 |
| 218900_at   | cyclin M4                                                          | CNNM4                 | 0.158079757  | 0.006591928 |
| 212414_s_at | cytokine-like nuclear factor n-pac /// septin 6                    | N-PAC /// SEPT6       | -0.189889638 | 0.00659997  |
| 220384_at   | thioredoxin domain containing 3 (spermatzoa)                       | TXNDC3                | 0.30466639   | 0.006610729 |
| 221272_s_at | chromosome 1 open reading frame 21                                 | C1orf21               | 0.294817026  | 0.00662324  |
| 201206_s_at | ribosome binding protein 1 homolog 180kDa (dog)                    | RRBP1                 | 0.466774857  | 0.006651951 |
| 218295_s_at | nucleoporin 50kDa                                                  | NUP50                 | 0.193682438  | 0.006739229 |
| 210993_s_at | SMAD family member 1                                               | SMAD1                 | 0.242243261  | 0.006756001 |
| 41113_at    | zinc finger protein 500                                            | ZNF500                | -0.206899358 | 0.006780245 |
| 217644_s_at | son of sevenless homolog 2 (Drosophila)                            | SOS2                  | 0.20192813   | 0.006787288 |
| 221646_s_at | zinc finger, DHHC-type containing 11                               | ZDHHC11               | -0.366155397 | 0.007089167 |
| 37005_at    | neuroblastoma, suppression of tumorigenicity 1                     | NBL1                  | -0.320804176 | 0.007092559 |
| 204589_at   | NUAK family, SNF1-like kinase, 1                                   | NUAK1                 | 0.518721613  | 0.007100007 |
| 213994_s_at | spondin 1, extracellular matrix protein                            | SPON1                 | -0.305667183 | 0.007132784 |
| 221979_at   | similar to hCG1811779                                              | LOC100129250          | -0.37915977  | 0.007191765 |
| 219516_at   | transient receptor potential cation channel, subfamily V, member 4 | TRPV4                 | 0.733375569  | 0.007227062 |
| 200827_at   | procollagen-lysine 1, 2-oxoglutarate 5-dioxygenase 1               | PLOD1                 | 0.267136643  | 0.00734353  |
| 210675_s_at | protein tyrosine phosphatase, receptor type, R                     | PTPRR                 | 0.455559093  | 0.007394684 |
| 35147_at    | MCF.2 cell line derived transforming sequence-like                 | MCF2L                 | -0.311114432 | 0.007411365 |
| 222285_at   | immunoglobulin heavy constant delta                                | IGHD                  | -0.477588472 | 0.007422004 |
| 203226_s_at | tetraspanin 31                                                     | TSPAN31               | -0.158389563 | 0.007424552 |
| 209841_s_at | leucine rich repeat neuronal 3                                     | LRRN3                 | -0.531186942 | 0.007449328 |



|                      |                                                                                          |                   |              |             |
|----------------------|------------------------------------------------------------------------------------------|-------------------|--------------|-------------|
| 205267_at            | POU class 2 associating factor 1                                                         | POU2AF1           | -0.265196778 | 0.007492213 |
| 212075_s_at          | casein kinase 2, alpha 1 polypeptide                                                     | CSNK2A1           | 0.269084816  | 0.007665417 |
| 205376_at            | inositol polyphosphate-4-phosphatase, type II, 105kDa                                    | INPP4B            | -0.229690301 | 0.007667837 |
| 211722_s_at          | histone deacetylase 6                                                                    | HDAC6             | 0.423101669  | 0.007677094 |
| 201430_s_at          | dihydropyrimidinase-like 3                                                               | DPYSL3            | 0.41043335   | 0.007683671 |
| 203215_s_at          | myosin VI                                                                                | MYO6              | 0.356675766  | 0.007699807 |
| 207464_at            | S-adenosylhomocysteine hydrolase-like 1                                                  | AHCYL1            | -0.289943667 | 0.00776576  |
| 212617_at            | zinc finger protein 609                                                                  | ZNF609            | -0.212939688 | 0.007767226 |
| 201934_at            | WD repeat domain 82                                                                      | WDR82             | -0.12685142  | 0.007916491 |
| 204679_at            | potassium channel, subfamily K, member 1                                                 | KCNK1             | 0.354192865  | 0.008005695 |
| 217492_s_at          | phosphatase and tensin homolog /// phosphatase and tensin homolog pseudogene 1           | PTEN /// PTENP1   | 0.17004751   | 0.008034531 |
| 219971_at            | interleukin 21 receptor                                                                  | IL21R             | -0.220840628 | 0.008036557 |
| 219221_at            | zinc finger and BTB domain containing 38                                                 | ZBTB38            | 0.274887587  | 0.008085445 |
| 217207_s_at          | butyrophilin-like 3                                                                      | BTNL3             | 2.576512829  | 0.00813886  |
| 212374_at            | fem-1 homolog b (C. elegans)                                                             | FEM1B             | 0.23284695   | 0.008189826 |
| 221907_at            | tRNA methyltransferase 61 homolog A (S. cerevisiae)                                      | TRMT61A           | -0.405044177 | 0.008245226 |
| 214076_at            | not yet annotated                                                                        | NA                | 0.16899714   | 0.008249382 |
| 214139_at            | not yet annotated                                                                        | NA                | 0.256206733  | 0.008344832 |
| 39248_at             | aquaporin 3 (Gill blood group)                                                           | AQP3              | -0.171771672 | 0.008376573 |
| 206786_at            | histatin 3                                                                               | HTN3              | -0.502825959 | 0.008462647 |
| 221088_s_at          | protein phosphatase 1, regulatory (inhibitor) subunit 9A                                 | PPP1R9A           | 0.517078015  | 0.008467344 |
| 220799_at            | glial cells missing homolog 2 (Drosophila)                                               | GCM2              | 0.325044024  | 0.008484862 |
| 219068_x_at          | ATPase family, AAA domain containing 3A /// ATPase family, AAA domain containing 3C      | ATAD3A /// ATAD3C | -0.331060383 | 0.008555447 |
| 206190_at            | G protein-coupled receptor 17                                                            | GPR17             | -0.622058564 | 0.008578201 |
| 206257_at            | coiled-coil domain containing 9                                                          | CCDC9             | -0.32808322  | 0.008590667 |
| 211462_s_at          | transducin (beta)-like 1Y-linked                                                         | TBL1Y             | 0.758743686  | 0.00862459  |
| 209485_s_at          | oxysterol binding protein-like 1A                                                        | OSBPL1A           | 0.231186115  | 0.008638068 |
| 215485_s_at          | intercellular adhesion molecule 1                                                        | ICAM1             | 0.246284716  | 0.008653038 |
| 215786_at            | not yet annotated                                                                        | NA                | -0.331581149 | 0.008655853 |
| AFFX-r2-Ec-bioB-M_at | not yet annotated                                                                        | NA                | 0.202988566  | 0.008699215 |
| 221906_at            | thioredoxin reductase 3                                                                  | TXNRD3            | -0.678453091 | 0.008700847 |
| 203545_at            | asparagine-linked glycosylation 8, alpha-1,3-glucosyltransferase homolog (S. cerevisiae) | ALG8              | -0.196360591 | 0.008816012 |

|             |                                                                                                         |           |              |             |
|-------------|---------------------------------------------------------------------------------------------------------|-----------|--------------|-------------|
| 212101_at   | karyopherin alpha 6 (importin alpha 7)                                                                  | KPNA6     | -0.149813243 | 0.008828397 |
| 205656_at   | protocadherin 17                                                                                        | PCDH17    | 0.475701043  | 0.008836367 |
| 205587_at   | FGFR1 oncogene partner                                                                                  | FGFR1OP   | -0.361935252 | 0.008899023 |
| 216202_s_at | serine palmitoyltransferase, long chain base subunit 2                                                  | SPTLC2    | 0.254967789  | 0.008942523 |
| 216503_s_at | myeloid/lymphoid or mixed-lineage leukemia (trithorax homolog, <i>Drosophila</i> ); translocated to, 10 | MLLT10    | 0.308260764  | 0.008972445 |
| 219532_at   | elongation of very long chain fatty acids (FEN1/Elo2, SUR4/Elo3, yeast)-like 4                          | ELOVL4    | -0.492361483 | 0.008974219 |
| 204560_at   | FK506 binding protein 5                                                                                 | FKBP5     | 0.358924107  | 0.009002514 |
| 220183_s_at | nudix (nucleoside diphosphate linked moiety X)-type motif 6                                             | NUDT6     | 0.295527592  | 0.009014013 |
| 215743_at   | N-myristoyltransferase 2                                                                                | NMT2      | -0.261777588 | 0.009039357 |
| 204553_x_at | inositol polyphosphate-4-phosphatase, type I, 107kDa                                                    | INPP4A    | 0.154705415  | 0.009229342 |
| 213580_at   | not yet annotated                                                                                       | NA        | 0.341889864  | 0.009230048 |
| 209995_s_at | T-cell leukemia/lymphoma 1A                                                                             | TCL1A     | -0.459081297 | 0.009247181 |
| 221790_s_at | low density lipoprotein receptor adaptor protein 1                                                      | LDLRAP1   | -0.238946582 | 0.009534002 |
| 210121_at   | UDP-Gal:betaGlcNAc beta 1,3-galactosyltransferase, polypeptide 2                                        | B3GALT2   | -0.434610925 | 0.009545439 |
| 212413_at   | septin 6                                                                                                | SEPT6     | -0.184567146 | 0.00954606  |
| 214968_at   | DEAD (Asp-Glu-Ala-Asp) box polypeptide 51                                                               | DDX51     | -0.555371762 | 0.00962018  |
| 201995_at   | exostoses (multiple) 1                                                                                  | EXT1      | 0.206942896  | 0.00965575  |
| 214216_s_at | La ribonucleoprotein domain family, member 5                                                            | LARP5     | 0.592120916  | 0.009690984 |
| 212766_s_at | interferon stimulated exonuclease gene 20kDa-like 2                                                     | ISG20L2   | -0.138246408 | 0.009785639 |
| 208806_at   | chromodomain helicase DNA binding protein 3                                                             | CHD3      | -0.203416965 | 0.009796176 |
| 217995_at   | sulfide quinone reductase-like (yeast)                                                                  | SQRDL     | 0.165335372  | 0.009812184 |
| 216751_at   | not yet annotated                                                                                       | NA        | -0.244495939 | 0.009815445 |
| 212542_s_at | pleckstrin homology domain interacting protein                                                          | PHIP      | 0.152145075  | 0.009876101 |
| 212763_at   | calmodulin regulated spectrin-associated protein 1-like 1                                               | CAMSAP1L1 | 0.297966492  | 0.009883783 |
| 219124_at   | chromosome 8 open reading frame 41                                                                      | C8orf41   | -0.085951827 | 0.009889273 |
| 206320_s_at | SMAD family member 9                                                                                    | SMAD9     | -0.393509714 | 0.009900105 |
| 213340_s_at | KIAA0495                                                                                                | KIAA0495  | -0.147360363 | 0.009936118 |
| 214563_at   | protocadherin gamma subfamily C, 3                                                                      | PCDHGC3   | 0.549977929  | 0.009950263 |
| 203450_at   | chibby homolog 1 ( <i>Drosophila</i> )                                                                  | CBY1      | -0.136339732 | 0.009952094 |
