# Supplementary material for: Blood transcriptomics of drug-naïve sporadic Parkinson’s disease patients
Source: PubMed Central journal article supplement (PMC4625854; doi:10.1186/s12864-015-2058-3), 2015-10-28
Supplement: 12864_2015_2058_MOESM7_ESM.pdf [file 12864_2015_2058_MOESM7_ESM.pdf]

**Additional file 7. List of differentially expressed genes between PD patients and controls based on Significance Analysis of Microarrays (SAM).** Significance Analysis of Microarrays was performed on normalized and filtered microarray data as described in the main text. The SAM test was run using 1000 permutations and a False Discovery Rate (FDR) of 10%. Ratios are calculated as differences in gene expression between samples of PD patients and controls, with the top up-regulated genes first.

| Affymetrix probe ID | Gene name                                                                                         | Gene symbol | Fold change | Ratio |
|---------------------|---------------------------------------------------------------------------------------------------|-------------|-------------|-------|
| 215390_at           | chromosome 9 open reading frame 5                                                                 | C9orf5      | 0.61        | -1.65 |
| 217671_at           | regulatory factor X, 3 (influences HLA class II expression)                                       | RFX3        | 0.63        | -1.59 |
| 205594_at           | zinc finger protein 652                                                                           | ZNF652      | 0.64        | -1.57 |
| 219532_at           | elongation of very long chain fatty acids (FEN1/Elo2, SUR4/Elo3, yeast)-like 4                    | ELOVL4      | 0.65        | -1.54 |
| 215750_at           | KIAA1659 protein                                                                                  | KIAA1659    | 0.66        | -1.53 |
| 209841_s_at         | leucine rich repeat neuronal 3                                                                    | LRRN3       | 0.66        | -1.52 |
| 209789_at           | coronin, actin binding protein, 2B                                                                | CORO2B      | 0.66        | -1.52 |
| 219671_at           | hippocalcin like 4                                                                                | HPCAL4      | 0.66        | -1.51 |
| 213674_x_at         | immunoglobulin heavy constant delta                                                               | IGHD        | 0.67        | -1.50 |
| 221101_at           | chromosome 14 open reading frame 113                                                              | C14orf113   | 0.67        | -1.50 |
| 205674_x_at         | FXVD domain containing ion transport regulator 2                                                  | FXVD2       | 0.67        | -1.49 |
| 220068_at           | pre-B lymphocyte gene 3                                                                           | VPREB3      | 0.69        | -1.46 |
| 210701_at           | craniofacial development protein 1                                                                | CFDP1       | 0.69        | -1.46 |
| 222285_at           | immunoglobulin heavy constant delta                                                               | IGHD        | 0.7         | -1.44 |
| 217647_at           | dihydroorotate dehydrogenase                                                                      | DHODH       | 0.7         | -1.43 |
| 209871_s_at         | amyloid beta (A4) precursor protein-binding, family A, member 2 (X11-like)                        | APBA2       | 0.7         | -1.42 |
| 214180_at           | mannosidase, alpha, class 1C, member 1                                                            | MAN1C1      | 0.72        | -1.39 |
| 215786_at           | remodeling and spacing factor 1                                                                   | RSF1        | 0.72        | -1.39 |
| 219846_at           | gon-4-like (C. elegans)                                                                           | GON4L       | 0.72        | -1.39 |
| 31637_s_at          | thyroid hormone receptor, alpha (erythroblastic leukemia viral (v-erb-a) oncogene homolog, avian) | THRA        | 0.72        | -1.39 |
| 214997_at           | Golgi autoantigen, golgin subfamily a, 1                                                          | GOLGA1      | 0.73        | -1.38 |
| 218693_at           | tetraspanin 15                                                                                    | TSPAN15     | 0.73        | -1.36 |
| 219315_s_at         | chromosome 16 open reading frame 30                                                               | C16orf30    | 0.74        | -1.36 |
| 209715_at           | chromobox homolog 5 (HP1 alpha homolog, Drosophila)                                               | CBX5        | 0.74        | -1.35 |
| 220085_at           | helicase, lymphoid-specific                                                                       | HELLS       | 0.74        | -1.35 |
| 33307_at            | ribosomal RNA processing 7 homolog A (S. cerevisiae)                                              | RRP7A       | 0.74        | -1.34 |
| 213922_at           | tau tubulin kinase 2                                                                              | TTBK2       | 0.74        | -1.34 |

|             |                                                                              |           |      |       |
|-------------|------------------------------------------------------------------------------|-----------|------|-------|
| 206548_at   | hypothetical protein FLJ23556                                                | FLJ23556  | 0.75 | -1.34 |
| 210607_at   | fms-related tyrosine kinase 3 ligand                                         | FLT3LG    | 0.75 | -1.34 |
| 213804_at   | inositol polyphosphate-5-phosphatase, 75kDa                                  | INPP5B    | 0.75 | -1.34 |
| 209153_s_at | transcription factor 3 (E2A immunoglobulin enhancer binding factors E12/E47) | TCF3      | 0.75 | -1.33 |
| 214309_s_at | Chromosome 21 open reading frame 2                                           | C21orf2   | 0.75 | -1.33 |
| 213462_at   | neuronal PAS domain protein 2                                                | NPAS2     | 0.76 | -1.32 |
| 210450_at   | hypothetical protein LOC90925                                                | LOC90925  | 0.76 | -1.32 |
| 218906_x_at | kinesin light chain 2                                                        | KLC2      | 0.76 | -1.32 |
| 222348_at   | Microtubule associated serine/threonine kinase family member 4               | MAST4     | 0.76 | -1.31 |
| 212935_at   | MCF.2 cell line derived transforming sequence-like                           | MCF2L     | 0.77 | -1.30 |
| 213428_s_at | collagen, type VI, alpha 1                                                   | COL6A1    | 0.77 | -1.30 |
| 222337_at   | oxysterol binding protein-like 9                                             | OSBPL9    | 0.77 | -1.30 |
| 219025_at   | CD248 molecule, endosialin                                                   | CD248     | 0.77 | -1.30 |
| 219815_at   | galactose-3-O-sulfotransferase 4                                             | GAL3ST4   | 0.77 | -1.29 |
| 211310_at   | enhancer of zeste homolog 1 (Drosophila)                                     | EZH1      | 0.78 | -1.29 |
| 210847_x_at | tumor necrosis factor receptor superfamily, member 25                        | TNFRSF25  | 0.78 | -1.29 |
| 215743_at   | N-myristoyltransferase 2                                                     | NMT2      | 0.78 | -1.29 |
| 212996_s_at | URB1 ribosome biogenesis 1 homolog (S. cerevisiae)                           | URB1      | 0.78 | -1.28 |
| 35147_at    | MCF.2 cell line derived transforming sequence-like                           | MCF2L     | 0.78 | -1.28 |
| 221648_s_at | agmatine ureohydrolase (agmatinase)                                          | AGMAT     | 0.78 | -1.28 |
| 203630_s_at | component of oligomeric golgi complex 5                                      | COG5      | 0.78 | -1.28 |
| 221979_at   | Topoisomerase I binding, arginine/serine-rich                                | TOPORS    | 0.78 | -1.28 |
| 221923_s_at | nucleophosmin (nucleolar phosphoprotein B23, numatrin)                       | NPM1      | 0.78 | -1.28 |
| 217645_at   | chromosome 14 open reading frame 112                                         | C14orf112 | 0.78 | -1.28 |
| 220728_at   | NA                                                                           | NA        | 0.79 | -1.27 |
| 207078_at   | mediator complex subunit 6                                                   | MED6      | 0.79 | -1.27 |
| 222091_at   | hippocalcin like 4                                                           | HPCAL4    | 0.79 | -1.27 |
| 206761_at   | CD96 molecule                                                                | CD96      | 0.79 | -1.27 |
| 222027_at   | Nuclear casein kinase and cyclin-dependent kinase substrate 1                | NUCKS1    | 0.79 | -1.27 |
| 203996_s_at | chromosome 21 open reading frame 2                                           | C21orf2   | 0.79 | -1.26 |
| 213283_s_at | sal-like 2 (Drosophila)                                                      | SALL2     | 0.79 | -1.26 |
| 221963_x_at | Transcribed locus                                                            | NA        | 0.79 | -1.26 |
| 215151_at   | dedicator of cytokinesis 10                                                  | DOCK10    | 0.79 | -1.26 |
| 207339_s_at | lymphotoxin beta (TNF superfamily, member 3)                                 | LTB       | 0.79 | -1.26 |
| 204484_at   | phosphoinositide-3-kinase, class 2, beta polypeptide                         | PIK3C2B   | 0.8  | -1.26 |

|             |                                                                                           |              |      |       |
|-------------|-------------------------------------------------------------------------------------------|--------------|------|-------|
| 219423_x_at | tumor necrosis factor receptor superfamily, member 25                                     | TNFRSF25     | 0.8  | -1.25 |
| 214739_at   | leucine-rich repeats and calponin homology (CH) domain containing 3                       | LRCH3        | 0.8  | -1.25 |
| 217152_at   | hypothetical LOC100271832                                                                 | LOC100271832 | 0.81 | -1.24 |
| 213666_at   | septin 6                                                                                  | SEPT6        | 0.81 | -1.24 |
| 210047_at   | solute carrier family 11 (proton-coupled divalent metal ion transporters), member 2       | SLC11A2      | 0.81 | -1.24 |
| 211282_x_at | tumor necrosis factor receptor superfamily, member 25                                     | TNFRSF25     | 0.81 | -1.24 |
| 203716_s_at | dipeptidyl-peptidase 4 (CD26, adenosine deaminase complexing protein 2)                   | DPP4         | 0.81 | -1.24 |
| 220609_at   | hypothetical protein LOC202181                                                            | LOC202181    | 0.81 | -1.24 |
| 203825_at   | bromodomain containing 3                                                                  | BRD3         | 0.81 | -1.23 |
| 206413_s_at | T-cell leukemia/lymphoma 6                                                                | TCL6         | 0.81 | -1.23 |
| 215726_s_at | cytochrome b5 type A (microsomal)                                                         | CYB5A        | 0.82 | -1.22 |
| 215346_at   | CD40 molecule, TNF receptor superfamily member 5                                          | CD40         | 0.82 | -1.22 |
| 219632_s_at | transient receptor potential cation channel, subfamily V, member 1                        | TRPV1        | 0.82 | -1.22 |
| 222141_at   | kelch-like 22 (Drosophila)                                                                | KLHL22       | 0.82 | -1.21 |
| 37590_g_at  | MRNA full length insert cDNA clone EUROIMAGE 375854///MRNA full length insert cDNA clone  | NA           | 0.83 | -1.21 |
| 201013_s_at | phosphoribosylaminoimidazole carboxylase, phosphoribosylaminoimidazole succinocarboxamide | PAICS        | 0.83 | -1.21 |
| 220215_at   | zinc finger protein 669                                                                   | ZNF669       | 0.83 | -1.20 |
| 214775_at   | Nedd4 binding protein 3                                                                   | N4BP3        | 0.83 | -1.20 |
| 207826_s_at | inhibitor of DNA binding 3, dominant negative helix-loop-helix protein                    | ID3          | 0.83 | -1.20 |
| 215030_at   | G-rich RNA sequence binding factor 1                                                      | GRSF1        | 0.84 | -1.20 |
| 214661_s_at | nucleolar protein 14                                                                      | NOL14        | 0.84 | -1.20 |
| 221868_at   | poly(A) binding protein interacting protein 2B                                            | PAIP2B       | 0.84 | -1.19 |
| 212186_at   | acetyl-Coenzyme A carboxylase alpha                                                       | ACACA        | 0.84 | -1.19 |
| 203226_s_at | tetraspanin 31                                                                            | TSPAN31      | 0.84 | -1.19 |
| 212414_s_at | septin 6                                                                                  | SEPT6        | 0.84 | -1.19 |
| 220618_s_at | zinc finger, CW type with PWWP domain 1                                                   | ZCWPW1       | 0.85 | -1.18 |
| 209623_at   | methylcrotonoyl-Coenzyme A carboxylase 2 (beta)                                           | MCCC2        | 0.85 | -1.18 |
| 41113_at    | zinc finger protein 500                                                                   | ZNF500       | 0.85 | -1.18 |
| 57516_at    | zinc finger protein 764                                                                   | ZNF764       | 0.85 | -1.18 |
| 213340_s_at | KIAA0495                                                                                  | KIAA0495     | 0.87 | -1.15 |
| 217807_s_at | glioma tumor suppressor candidate region gene 2                                           | GLTSCR2      | 0.87 | -1.15 |
| 39248_at    | aquaporin 3 (Gill blood group)                                                            | AQP3         | 0.88 | -1.14 |
| 208828_at   | polymerase (DNA directed), epsilon 3 (p17 subunit)                                        | POLE3        | 0.88 | -1.14 |

|             |                                                                           |          |      |       |
|-------------|---------------------------------------------------------------------------|----------|------|-------|
| 202658_at   | peroxisomal biogenesis factor 11B                                         | PEX11B   | 0.88 | -1.13 |
| 220152_at   | chromosome 10 open reading frame 95                                       | C10orf95 | 0.89 | -1.12 |
| 208763_s_at | TSC22 domain family, member 3                                             | TSC22D3  | 1.15 | 1.15  |
| 217995_at   | sulfide quinone reductase-like (yeast)                                    | SQRDL    | 1.17 | 1.17  |
| 205530_at   | electron-transferring-flavoprotein dehydrogenase                          | ETFDH    | 1.22 | 1.22  |
| 203645_s_at | CD163 molecule                                                            | CD163    | 1.27 | 1.27  |
| 212831_at   | multiple EGF-like-domains 9                                               | MEGF9    | 1.29 | 1.29  |
| 204530_s_at | thymocyte selection-associated high mobility group box                    | TOX      | 1.29 | 1.29  |
| 203658_at   | solute carrier family 25 (carnitine/acylcarnitine translocase), member 20 | SLC25A20 | 1.29 | 1.29  |
| 221592_at   | TBC1 domain family, member 8 (with GRAM domain)                           | TBC1D8   | 1.33 | 1.33  |
| 206757_at   | phosphodiesterase 5A, cGMP-specific                                       | PDE5A    | 1.34 | 1.34  |
| 213006_at   | CCAAT/enhancer binding protein (C/EBP), delta                             | CEBPD    | 1.35 | 1.35  |
| 213963_s_at | Sin3A-associated protein, 30kDa                                           | SAP30    | 1.35 | 1.35  |
| 208893_s_at | dual specificity phosphatase 6                                            | DUSP6    | 1.37 | 1.37  |
| 206618_at   | interleukin 18 receptor 1                                                 | IL18R1   | 1.45 | 1.45  |
| 202436_s_at | cytochrome P450, family 1, subfamily B, polypeptide 1                     | CYP1B1   | 1.48 | 1.48  |
| 201340_s_at | ectodermal-neural cortex (with BTB-like domain)                           | ENC1     | 1.55 | 1.55  |
| 213435_at   | SATB homeobox 2                                                           | SATB2    | 1.67 | 1.67  |
| 217207_s_at | butyrophilin-like 3                                                       | BTNL3    | 2.11 | 2.11  |
