# Supplementary material for: Blood transcriptomics of drug-naïve sporadic Parkinson’s disease patients
Source: PubMed Central journal article supplement (PMC4625854; doi:10.1186/s12864-015-2058-3), 2015-10-28
Supplement: 12864_2015_2058_MOESM8_ESM.pdf [file 12864_2015_2058_MOESM8_ESM.pdf]

**Additional file 8. List of differentially expressed genes between PD patients and controls based on Rank Product analysis (RP).** Rank Product analysis was performed on normalized and filtered microarray data as described in the main text. The RP test was run using 100 permutations and an FDR of 0.005%, and looking for up- and down-regulated genes separately. Low RP-Values indicate high significance of the results. Genes are shown with the most significant first.

**Up-regulated genes**

| <b>Affymetrix probe ID</b> | <b>Gene name</b>                                                                                | <b>Gene symbol</b> | <b>p-Values</b> | <b>q-Values</b> | <b>RP-Values</b> | <b>Fold Change</b> |
|----------------------------|-------------------------------------------------------------------------------------------------|--------------------|-----------------|-----------------|------------------|--------------------|
| 217207_s_at                | butyrophilin-like 3                                                                             | BTNL3              | 0               | 0               | 206.35           | 0.33               |
| 213831_at                  | major histocompatibility complex, class II, DQ alpha 1                                          | HLA-DQA1           | 0               | 0               | 337.25           | 0.37               |
| 209480_at                  | major histocompatibility complex, class II, DQ beta 1                                           | HLA-DQB1           | 0               | 0               | 448.67           | 0.42               |
| 201909_at                  | ribosomal protein S4, Y-linked 1                                                                | RPS4Y1             | 0               | 0               | 497.16           | 0.48               |
| 214131_at                  | chromosome Y open reading frame 15B                                                             | CYorf15B           | 0               | 0               | 589.67           | 0.51               |
| 206700_s_at                | jumonji, AT rich interactive domain 1D                                                          | JARID1D            | 0               | 0               | 591.58           | 0.56               |
| 205000_at                  | DEAD (Asp-Glu-Ala-Asp) box polypeptide 3, Y-linked                                              | DDX3Y              | 0               | 0               | 623.18           | 0.56               |
| 204409_s_at                | eukaryotic translation initiation factor 1A, Y-linked                                           | EIF1AY             | 0               | 0               | 628.71           | 0.55               |
| 211149_at                  | ubiquitously transcribed tetratricopeptide repeat gene, Y-linked                                | UTY                | 0               | 0               | 747.74           | 0.61               |
| 204410_at                  | eukaryotic translation initiation factor 1A, Y-linked                                           | EIF1AY             | 0               | 0               | 758.92           | 0.59               |
| 205001_s_at                | DEAD (Asp-Glu-Ala-Asp) box polypeptide 3, Y-linked                                              | DDX3Y              | 0               | 0               | 791.40           | 0.63               |
| 205048_s_at                | phosphoserine phosphatase                                                                       | PSPH               | 0               | 0               | 810.22           | 0.66               |
| 206624_at                  | ubiquitin specific peptidase 9, Y-linked (fat facets-like, Drosophila)                          | USP9Y              | 0               | 0               | 810.49           | 0.69               |
| 209875_s_at                | secreted phosphoprotein 1                                                                       | SPP1               | 0               | 0               | 864.82           | 0.65               |
| 205767_at                  | epiregulin                                                                                      | EREG               | 0               | 0               | 878.49           | 0.65               |
| 212999_x_at                | similar to Major histocompatibility complex, class II, DR beta 4                                | LOC100133484       | 0               | 0               | 889.36           | 0.68               |
| 207067_s_at                | histidine decarboxylase                                                                         | HDC                | 0               | 0               | 912.69           | 0.73               |
| 218345_at                  | transmembrane protein 176A                                                                      | TMEM176A           | 0               | 0               | 1050.71          | 0.88               |
| 206279_at                  | protein kinase, Y-linked                                                                        | PRKY               | 0               | 0               | 1066.04          | 0.75               |
| 209728_at                  | major histocompatibility complex, class II, DR beta 4                                           | HLA-DRB4           | 0               | 0               | 1081.46          | 1.12               |
| 207269_at                  | defensin, alpha 4, corticostatin                                                                | DEFA4              | 0               | 0               | 1083.74          | 0.76               |
| 210322_x_at                | ubiquitously transcribed tetratricopeptide repeat gene, Y-linked                                | UTY                | 0               | 0               | 1128.62          | 0.76               |
| 203757_s_at                | carcinoembryonic antigen-related cell adhesion molecule 6 (non-specific cross reacting antigen) | CEACAM6            | 0               | 0               | 1130.74          | 0.73               |
| 220532_s_at                | transmembrane protein 176B                                                                      | TMEM176B           | 0               | 0               | 1147.14          | 0.98               |

|             |                                                                                                 |          |   |   |         |      |
|-------------|-------------------------------------------------------------------------------------------------|----------|---|---|---------|------|
| 204589_at   | NUAK family, SNF1-like kinase, 1                                                                | NUAK1    | 0 | 0 | 1193.96 | 0.66 |
| 214983_at   | testis-specific transcript, Y-linked 15                                                         | TTY15    | 0 | 0 | 1194.43 | 0.81 |
| 215838_at   | leukocyte immunoglobulin-like receptor, subfamily A (with TM domain), member 5                  | LILRA5   | 0 | 0 | 1198.81 | 0.67 |
| 212187_x_at | prostaglandin D2 synthase 21kDa (brain)                                                         | PTGDS    | 0 | 0 | 1213.10 | 0.72 |
| 202203_s_at | autocrine motility factor receptor                                                              | AMFR     | 0 | 0 | 1258.70 | 0.82 |
| 218340_s_at | ubiquitin-like modifier activating enzyme 6                                                     | UBA6     | 0 | 0 | 1261.83 | 0.80 |
| 206108_s_at | splicing factor, arginine/serine-rich 6                                                         | SFRS6    | 0 | 0 | 1275.36 | 0.76 |
| 201340_s_at | ectodermal-neural cortex (with BTB-like domain)                                                 | ENC1     | 0 | 0 | 1290.26 | 0.67 |
| 202018_s_at | lactotransferrin                                                                                | LTF      | 0 | 0 | 1296.26 | 0.79 |
| 208067_x_at | ubiquitously transcribed tetratricopeptide repeat gene, Y-linked                                | UTY      | 0 | 0 | 1303.99 | 0.72 |
| 202072_at   | heterogeneous nuclear ribonucleoprotein L                                                       | HNRNPL   | 0 | 0 | 1316.01 | 0.71 |
| 205624_at   | carboxypeptidase A3 (mast cell)                                                                 | CPA3     | 0 | 0 | 1332.81 | 0.90 |
| 206177_s_at | arginase, liver                                                                                 | ARG1     | 0 | 0 | 1337.55 | 0.71 |
| 201110_s_at | thrombospondin 1                                                                                | THBS1    | 0 | 0 | 1343.09 | 0.79 |
| 219935_at   | ADAM metallopeptidase with thrombospondin type 1 motif, 5                                       | ADAMTS5  | 0 | 0 | 1369.69 | 0.73 |
| 209710_at   | GATA binding protein 2                                                                          | GATA2    | 0 | 0 | 1374.00 | 0.84 |
| 212730_at   | desmuslin                                                                                       | DMN      | 0 | 0 | 1405.40 | 0.72 |
| 207063_at   | chromosome Y open reading frame 14                                                              | CYorf14  | 0 | 0 | 1413.33 | 0.96 |
| 201058_s_at | myosin, light chain 9, regulatory                                                               | MYL9     | 0 | 0 | 1413.64 | 0.81 |
| 211748_x_at | prostaglandin D2 synthase 21kDa (brain)                                                         | PTGDS    | 0 | 0 | 1416.62 | 0.75 |
| 212509_s_at | matrix-remodelling associated 7                                                                 | MXRA7    | 0 | 0 | 1437.64 | 0.75 |
| 211657_at   | carcinoembryonic antigen-related cell adhesion molecule 6 (non-specific cross reacting antigen) | CEACAM6  | 0 | 0 | 1449.78 | 0.88 |
| 206647_at   | hemoglobin, zeta                                                                                | HBZ      | 0 | 0 | 1460.52 | 0.86 |
| 220120_s_at | erythrocyte membrane protein band 4.1 like 4A                                                   | EPB41L4A | 0 | 0 | 1475.54 | 0.70 |
| 212793_at   | dishevelled associated activator of morphogenesis 2                                             | DAAM2    | 0 | 0 | 1484.05 | 0.76 |
| 221428_s_at | transducin (beta)-like 1 X-linked receptor 1                                                    | TBL1XR1  | 0 | 0 | 1496.24 | 0.88 |
| 209992_at   | 6-phosphofructo-2-kinase/fructose-2,6-biphosphatase 2                                           | PFKFB2   | 0 | 0 | 1538.70 | 0.71 |
| 203815_at   | glutathione S-transferase theta 1                                                               | GSTT1    | 0 | 0 | 1542.10 | 0.84 |
| 203789_s_at | sema domain, immunoglobulin domain (Ig), short basic domain, secreted, (semaphorin) 3C          | SEMA3C   | 0 | 0 | 1543.80 | 0.74 |
| 203498_at   | regulator of calcineurin 2                                                                      | RCAN2    | 0 | 0 | 1547.99 | 0.82 |
| 207723_s_at | killer cell lectin-like receptor subfamily C, member 3                                          | KLRC3    | 0 | 0 | 1560.26 | 0.76 |
| 211663_x_at | prostaglandin D2 synthase 21kDa (brain)                                                         | PTGDS    | 0 | 0 | 1567.19 | 0.76 |
| 215574_at   | not yet annotated                                                                               | NA       | 0 | 0 | 1570.36 | 0.83 |

|             |                                                                                                                          |          |          |          |         |      |
|-------------|--------------------------------------------------------------------------------------------------------------------------|----------|----------|----------|---------|------|
| 205900_at   | keratin 1                                                                                                                | KRT1     | 0        | 0        | 1588.94 | 0.94 |
| 207496_at   | membrane-spanning 4-domains, subfamily A, member 2 (Fc fragment of IgE, high affinity I, receptor for; beta polypeptide) | MS4A2    | 0        | 0        | 1613.09 | 0.84 |
| 216361_s_at | MYST histone acetyltransferase (monocytic leukemia) 3                                                                    | MYST3    | 0        | 0        | 1616.63 | 0.77 |
| 215037_s_at | BCL2-like 1                                                                                                              | BCL2L1   | 0        | 0        | 1621.20 | 0.81 |
| 202286_s_at | tumor-associated calcium signal transducer 2                                                                             | TACSTD2  | 0        | 0        | 1623.29 | 0.94 |
| 35201_at    | heterogeneous nuclear ribonucleoprotein L                                                                                | HNRNPL   | 0        | 0        | 1629.31 | 0.75 |
| 214218_s_at | X (inactive)-specific transcript (non-protein coding)                                                                    | XIST     | 0        | 0        | 1629.93 | 2.43 |
| 221753_at   | slingshot homolog 1 (Drosophila)                                                                                         | SSH1     | 0        | 0        | 1631.41 | 0.74 |
| 215666_at   | major histocompatibility complex, class II, DR beta 4                                                                    | HLA-DRB4 | 0        | 0        | 1632.70 | 1.12 |
| 206448_at   | zinc finger protein 365                                                                                                  | ZNF365   | 0        | 0        | 1639.00 | 0.76 |
| 209686_at   | S100 calcium binding protein B                                                                                           | S100B    | 0        | 0        | 1650.43 | 1.10 |
| 207802_at   | cysteine-rich secretory protein 3                                                                                        | CRISP3   | 0        | 0        | 1651.19 | 0.85 |
| 203184_at   | fibrillin 2                                                                                                              | FBN2     | 0        | 0        | 1654.79 | 0.74 |
| 212520_s_at | SWI/SNF related, matrix associated, actin dependent regulator of chromatin, subfamily a, member 4                        | SMARCA4  | 7.24E-07 | 1.41E-04 | 1661.47 | 0.82 |
| 211430_s_at | immunoglobulin heavy constant gamma 3 (G3m marker)                                                                       | IGHG3    | 7.24E-07 | 1.41E-04 | 1687.47 | 0.92 |
| 213338_at   | transmembrane protein 158                                                                                                | TMEM158  | 1.45E-06 | 2.74E-04 | 1697.86 | 0.83 |
| 201369_s_at | zinc finger protein 36, C3H type-like 2                                                                                  | ZFP36L2  | 1.45E-06 | 2.74E-04 | 1700.06 | 0.78 |
| 212768_s_at | olfactomedin 4                                                                                                           | OLFM4    | 1.45E-06 | 2.74E-04 | 1708.52 | 1.04 |
| 209706_at   | NK3 homeobox 1                                                                                                           | NKX3-1   | 1.45E-06 | 2.74E-04 | 1710.06 | 1.03 |
| 203216_s_at | myosin VI                                                                                                                | MYO6     | 1.45E-06 | 2.74E-04 | 1710.42 | 0.77 |
| 210896_s_at | aspartate beta-hydroxylase                                                                                               | ASPH     | 1.45E-06 | 2.74E-04 | 1718.91 | 0.74 |
| 203638_s_at | fibroblast growth factor receptor 2                                                                                      | FGFR2    | 1.45E-06 | 2.74E-04 | 1724.42 | 0.87 |
| 205653_at   | cathepsin G                                                                                                              | CTSG     | 1.45E-06 | 2.74E-04 | 1746.61 | 0.88 |
| 202437_s_at | cytochrome P450, family 1, subfamily B, polypeptide 1                                                                    | CYP1B1   | 1.45E-06 | 2.74E-04 | 1749.68 | 0.75 |
| 210321_at   | granzyme H (cathepsin G-like 2, protein h-CCPX)                                                                          | GZMH     | 1.45E-06 | 2.74E-04 | 1752.65 | 0.73 |
| 203215_s_at | myosin VI                                                                                                                | MYO6     | 1.45E-06 | 2.74E-04 | 1752.72 | 0.72 |
| 204560_at   | FK506 binding protein 5                                                                                                  | FKBP5    | 1.45E-06 | 2.74E-04 | 1753.97 | 0.71 |
| 205158_at   | ribonuclease, RNase A family, 4                                                                                          | RNASE4   | 1.45E-06 | 2.74E-04 | 1764.98 | 0.71 |
| 211654_x_at | major histocompatibility complex, class II, DQ beta 1                                                                    | HLA-DQB1 | 1.45E-06 | 2.74E-04 | 1769.43 | 0.75 |
| 205654_at   | complement component 4 binding protein, alpha                                                                            | C4BPA    | 1.45E-06 | 2.74E-04 | 1771.64 | 0.89 |
| 202435_s_at | cytochrome P450, family 1, subfamily B, polypeptide 1                                                                    | CYP1B1   | 2.17E-06 | 3.41E-04 | 1784.70 | 0.71 |
| 220122_at   | multiple C2 domains, transmembrane 1                                                                                     | MCTP1    | 2.17E-06 | 3.41E-04 | 1785.38 | 0.79 |
| 206881_s_at | leukocyte immunoglobulin-like receptor, subfamily A (without TM domain), member 3                                        | LILRA3   | 2.90E-06 | 4.44E-04 | 1801.77 | 0.76 |
| 221728_x_at | X (inactive)-specific transcript (non-protein coding)                                                                    | XIST     | 2.90E-06 | 4.44E-04 | 1807.00 | 2.35 |

|             |                                                                                                  |             |          |             |         |      |
|-------------|--------------------------------------------------------------------------------------------------|-------------|----------|-------------|---------|------|
| 202436_s_at | cytochrome P450, family 1, subfamily B, polypeptide 1                                            | CYP1B1      | 2.90E-06 | 4.44E-04    | 1807.27 | 0.69 |
| 204148_s_at | POM (POM121 homolog, rat) and ZP3 fusion                                                         | POMZP3      | 2.90E-06 | 4.44E-04    | 1816.13 | 0.79 |
| 204415_at   | interferon, alpha-inducible protein 6                                                            | IFI6        | 2.90E-06 | 4.44E-04    | 1819.15 | 0.77 |
| 214153_at   | ELOVL family member 5, elongation of long chain fatty acids (FEN1/Elo2, SUR4/Elo3-like, yeast)   | ELOVL5      | 2.90E-06 | 4.44E-04    | 1820.53 | 0.76 |
| 202770_s_at | cyclin G2                                                                                        | CCNG2       | 3.62E-06 | 5.21E-04    | 1825.73 | 0.84 |
| 213319_s_at | cold shock domain protein A                                                                      | CSDA        | 3.62E-06 | 5.21E-04    | 1828.32 | 0.78 |
| 207357_s_at | UDP-N-acetyl-alpha-D-galactosamine:polypeptide N-acetylgalactosaminyltransferase 10 (GalNAc-T10) | GALNT10     | 4.35E-06 | 6.12E-04    | 1829.48 | 0.72 |
| 205040_at   | orosomucoid 1                                                                                    | ORM1        | 4.35E-06 | 6.12E-04    | 1829.49 | 0.90 |
| 204066_s_at | centaurin, gamma 2                                                                               | CENTG2      | 4.35E-06 | 6.12E-04    | 1832.92 | 0.77 |
| 206676_at   | carcinoembryonic antigen-related cell adhesion molecule 8                                        | CEACAM8     | 4.35E-06 | 6.12E-04    | 1842.80 | 0.92 |
| 205110_s_at | fibroblast growth factor 13                                                                      | FGF13       | 5.07E-06 | 6.86E-04    | 1854.84 | 1.00 |
| 211571_s_at | versican                                                                                         | VCAN        | 6.52E-06 | 8.74E-04    | 1874.05 | 0.71 |
| 220220_at   | leucine rich repeat containing 37, member A4 (pseudogene)                                        | LRRC37A4    | 7.24E-06 | 9.62E-04    | 1891.15 | 0.78 |
| 213478_at   | kazrin                                                                                           | RP1-21O18.1 | 7.97E-06 | 0.001047619 | 1899.06 | 0.78 |
| 209031_at   | cell adhesion molecule 1                                                                         | CADM1       | 8.69E-06 | 0.001132075 | 1902.89 | 0.79 |
| 210504_at   | Kruppel-like factor 1 (erythroid)                                                                | KLF1        | 9.42E-06 | 0.001214953 | 1906.12 | 0.95 |
| 215646_s_at | versican                                                                                         | VCAN        | 9.42E-06 | 0.001214953 | 1907.47 | 0.72 |
| 201341_at   | ectodermal-neural cortex (with BTB-like domain)                                                  | ENC1        | 9.42E-06 | 0.001214953 | 1909.57 | 0.78 |
| 202411_at   | interferon, alpha-inducible protein 27                                                           | IFI27       | 1.01E-05 | 0.001272727 | 1919.41 | 0.82 |
| 204141_at   | tubulin, beta 2A                                                                                 | TUBB2A      | 1.09E-05 | 0.001351351 | 1922.91 | 1.18 |
| 206665_s_at | BCL2-like 1                                                                                      | BCL2L1      | 1.16E-05 | 0.001428571 | 1923.85 | 0.80 |
| 220553_s_at | PRP39 pre-mRNA processing factor 39 homolog (S. cerevisiae)                                      | PRPF39      | 1.23E-05 | 0.001504425 | 1932.99 | 0.84 |
| 206618_at   | interleukin 18 receptor 1                                                                        | IL18R1      | 1.30E-05 | 0.001578947 | 1934.84 | 0.70 |
| 207674_at   | Fc fragment of IgA, receptor for                                                                 | FCAR        | 1.30E-05 | 0.001578947 | 1936.56 | 1.11 |
| 205728_at   | not yet annotated                                                                                | NA          | 1.30E-05 | 0.001578947 | 1938.23 | 0.78 |
| 204713_s_at | coagulation factor V (proaccelerin, labile factor)                                               | F5          | 1.30E-05 | 0.001578947 | 1940.49 | 0.76 |
| 218872_at   | tescalcin                                                                                        | TESC        | 1.30E-05 | 0.001578947 | 1942.22 | 0.93 |
| 219630_at   | PDZK1 interacting protein 1                                                                      | PDZK1IP1    | 1.30E-05 | 0.001578947 | 1947.57 | 0.90 |
| 208710_s_at | adaptor-related protein complex 3, delta 1 subunit                                               | AP3D1       | 1.52E-05 | 0.00175     | 1963.75 | 0.83 |
| 206371_at   | folate receptor 3 (gamma)                                                                        | FOLR3       | 1.52E-05 | 0.00175     | 1972.85 | 0.83 |
| 205041_s_at | orosomucoid 1                                                                                    | ORM1        | 1.52E-05 | 0.00175     | 1975.45 | 0.91 |
| 212816_s_at | cystathionine-beta-synthase                                                                      | CBS         | 1.52E-05 | 0.00175     | 1975.67 | 0.81 |
| 205557_at   | bactericidal/permeability-increasing protein                                                     | BPI         | 1.52E-05 | 0.00175     | 1975.74 | 0.92 |
| 208451_s_at | complement component 4B (Childo blood group)                                                     | C4B         | 1.67E-05 | 0.00184     | 1988.91 | 0.82 |

|             |                                                                                        |          |          |             |         |      |
|-------------|----------------------------------------------------------------------------------------|----------|----------|-------------|---------|------|
| 203559_s_at | amiloride binding protein 1 (amine oxidase (copper-containing))                        | ABP1     | 1.74E-05 | 0.001904762 | 1993.15 | 0.88 |
| 215839_at   | leukocyte immunoglobulin-like receptor, subfamily A (with TM domain), member 5         | LILRA5   | 1.74E-05 | 0.001904762 | 1993.92 | 0.75 |
| 203319_s_at | zinc finger protein 148                                                                | ZNF148   | 1.81E-05 | 0.001953125 | 2004.08 | 0.75 |
| 209960_at   | hepatocyte growth factor (hepapoietin A; scatter factor)                               | HGF      | 1.81E-05 | 0.001953125 | 2006.82 | 0.79 |
| 210517_s_at | A kinase (PRKA) anchor protein 12                                                      | AKAP12   | 1.81E-05 | 0.001953125 | 2006.85 | 0.94 |
| 206025_s_at | tumor necrosis factor, alpha-induced protein 6                                         | TNFAIP6  | 1.81E-05 | 0.001953125 | 2012.03 | 0.80 |
| 215242_at   | phosphatidylinositol glycan anchor biosynthesis, class C                               | PIGC     | 1.81E-05 | 0.001953125 | 2012.08 | 1.04 |
| 203231_s_at | ataxin 1                                                                               | ATXN1    | 1.88E-05 | 0.001954887 | 2015.78 | 0.84 |
| 201005_at   | CD9 molecule                                                                           | CD9      | 1.96E-05 | 0.002014926 | 2016.96 | 0.92 |
| 214036_at   | not yet annotated                                                                      | NA       | 2.03E-05 | 0.002074074 | 2021.69 | 0.77 |
| 204794_at   | dual specificity phosphatase 2                                                         | DUSP2    | 2.61E-05 | 0.002647059 | 2034.99 | 0.80 |
| 214215_s_at | La ribonucleoprotein domain family, member 5                                           | LARP5    | 2.90E-05 | 0.002919708 | 2042.10 | 0.76 |
| 214453_s_at | interferon-induced protein 44                                                          | IFI44    | 2.90E-05 | 0.002919708 | 2044.43 | 0.85 |
| 201333_s_at | Rho guanine nucleotide exchange factor (GEF) 12                                        | ARHGEF12 | 2.90E-05 | 0.002919708 | 2045.46 | 0.85 |
| 206757_at   | phosphodiesterase 5A, cGMP-specific                                                    | PDE5A    | 3.12E-05 | 0.003071429 | 2048.71 | 0.72 |
| 202509_s_at | tumor necrosis factor, alpha-induced protein 2                                         | TNFAIP2  | 3.26E-05 | 0.003191489 | 2053.88 | 0.86 |
| 215990_s_at | B-cell CLL/lymphoma 6                                                                  | BCL6     | 3.26E-05 | 0.003191489 | 2054.12 | 0.77 |
| 203936_s_at | matrix metalloproteinase 9 (gelatinase B, 92kDa gelatinase, 92kDa type IV collagenase) | MMP9     | 3.33E-05 | 0.003216783 | 2056.74 | 0.80 |
| 206857_s_at | FK506 binding protein 1B, 12.6 kDa                                                     | FKBP1B   | 3.40E-05 | 0.003263889 | 2060.67 | 0.89 |
| 210797_s_at | 2'-5'-oligoadenylate synthetase-like                                                   | OASL     | 3.48E-05 | 0.003310345 | 2063.03 | 0.76 |
| 206785_s_at | killer cell lectin-like receptor subfamily C, member 2                                 | KLRC2    | 3.62E-05 | 0.003424658 | 2072.89 | 0.82 |
| 219519_s_at | sialic acid binding Ig-like lectin 1, sialoadhesin                                     | SIGLEC1  | 3.69E-05 | 0.003469388 | 2074.52 | 0.82 |
| 204533_at   | chemokine (C-X-C motif) ligand 10                                                      | CXCL10   | 3.84E-05 | 0.003581081 | 2075.99 | 0.92 |
| 201392_s_at | insulin-like growth factor 2 receptor                                                  | IGF2R    | 4.06E-05 | 0.003758389 | 2078.86 | 0.78 |
| 203504_s_at | ATP-binding cassette, sub-family A (ABC1), member 1                                    | ABCA1    | 4.13E-05 | 0.0038      | 2079.69 | 0.81 |
| 215684_s_at | activating signal cointegrator 1 complex subunit 2                                     | ASCC2    | 4.56E-05 | 0.004172185 | 2087.54 | 0.86 |
| 221268_s_at | sphingosine-1-phosphate phosphatase 1                                                  | SGPP1    | 4.78E-05 | 0.004342105 | 2093.53 | 1.10 |
| 203961_at   | nebulin                                                                                | NEBL     | 5.00E-05 | 0.004509804 | 2102.49 | 1.17 |
| 220404_at   | G protein-coupled receptor 97                                                          | GPR97    | 5.14E-05 | 0.00461039  | 2106.53 | 0.78 |
| 206877_at   | MAX dimerization protein 1                                                             | MXD1     | 5.22E-05 | 0.004645161 | 2106.92 | 0.79 |
| 203942_s_at | MAP/microtubule affinity-regulating kinase 2                                           | MARK2    | 5.29E-05 | 0.004679487 | 2110.39 | 0.82 |

**Down-regulated genes**

| Affymetrix probe ID | Gene name | Gene symbol | p-Values | q-Values | RP-Values | Fold Change |
|---------------------|-----------|-------------|----------|----------|-----------|-------------|
|---------------------|-----------|-------------|----------|----------|-----------|-------------|

|             |                                                                                |          |   |   |         |      |
|-------------|--------------------------------------------------------------------------------|----------|---|---|---------|------|
| 203290_at   | major histocompatibility complex, class II, DQ alpha 1                         | HLA-DQA1 | 0 | 0 | 192.80  | 4.96 |
| 214218_s_at | X (inactive)-specific transcript (non-protein coding)                          | XIST     | 0 | 0 | 367.79  | 2.43 |
| 221728_x_at | X (inactive)-specific transcript (non-protein coding)                          | XIST     | 0 | 0 | 413.06  | 2.35 |
| 217671_at   | not yet annotated                                                              | NA       | 0 | 0 | 655.43  | 1.77 |
| 221491_x_at | major histocompatibility complex, class II, DR beta 3                          | HLA-DRB3 | 0 | 0 | 710.39  | 1.54 |
| 209841_s_at | leucine rich repeat neuronal 3                                                 | LRRN3    | 0 | 0 | 710.44  | 1.71 |
| 220281_at   | solute carrier family 12 (sodium/potassium/chloride transporters), member 1    | SLC12A1  | 0 | 0 | 844.85  | 1.29 |
| 210432_s_at | sodium channel, voltage-gated, type III, alpha subunit                         | SCN3A    | 0 | 0 | 891.23  | 1.54 |
| 209728_at   | major histocompatibility complex, class II, DR beta 4                          | HLA-DRB4 | 0 | 0 | 933.19  | 1.12 |
| 213825_at   | oligodendrocyte lineage transcription factor 2                                 | OLIG2    | 0 | 0 | 950.93  | 1.48 |
| 219179_at   | dapper, antagonist of beta-catenin, homolog 1 (Xenopus laevis)                 | DACT1    | 0 | 0 | 955.19  | 1.44 |
| 204141_at   | tubulin, beta 2A                                                               | TUBB2A   | 0 | 0 | 970.29  | 1.18 |
| 205493_s_at | dihydropyrimidinase-like 4                                                     | DPYSL4   | 0 | 0 | 974.26  | 1.56 |
| 205826_at   | myomesin (M-protein) 2, 165kDa                                                 | MYOM2    | 0 | 0 | 1003.57 | 1.25 |
| 215666_at   | major histocompatibility complex, class II, DR beta 4                          | HLA-DRB4 | 0 | 0 | 1035.27 | 1.12 |
| 215374_at   | poly(A) polymerase alpha                                                       | PAPOLA   | 0 | 0 | 1052.13 | 1.50 |
| 207328_at   | arachidonate 15-lipoxygenase                                                   | ALOX15   | 0 | 0 | 1056.14 | 1.32 |
| 208253_at   | sialic acid binding Ig-like lectin 8                                           | SIGLEC8  | 0 | 0 | 1084.14 | 1.39 |
| 207674_at   | Fc fragment of IgA, receptor for                                               | FCAR     | 0 | 0 | 1107.21 | 1.11 |
| 215652_at   | succinate dehydrogenase complex, subunit D, integral membrane protein          | SDHD     | 0 | 0 | 1125.90 | 1.71 |
| 219532_at   | elongation of very long chain fatty acids (FEN1/Elo2, SUR4/Elo3, yeast)-like 4 | ELOVL4   | 0 | 0 | 1128.12 | 1.48 |
| 215083_at   | not yet annotated                                                              | NA       | 0 | 0 | 1132.27 | 1.50 |
| 209840_s_at | leucine rich repeat neuronal 3                                                 | LRRN3    | 0 | 0 | 1141.26 | 1.42 |
| 213382_at   | macrophage stimulating, pseudogene 9                                           | MSTP9    | 0 | 0 | 1163.18 | 1.33 |
| 220421_at   | butyrophilin-like 8                                                            | BTNL8    | 0 | 0 | 1166.15 | 1.33 |
| 209686_at   | S100 calcium binding protein B                                                 | S100B    | 0 | 0 | 1167.24 | 1.10 |
| 221205_at   | not yet annotated                                                              | NA       | 0 | 0 | 1201.03 | 1.44 |
| 222285_at   | immunoglobulin heavy constant gamma 1 (G1m marker)                             | IGHG1    | 0 | 0 | 1213.23 | 1.52 |
| 206632_s_at | apolipoprotein B mRNA editing enzyme, catalytic polypeptide-like 3B            | APOBEC3B | 0 | 0 | 1215.96 | 1.30 |
| 220532_s_at | transmembrane protein 176B                                                     | TMEM176B | 0 | 0 | 1222.04 | 0.98 |
| 203961_at   | nebulette                                                                      | NEBL     | 0 | 0 | 1247.28 | 1.17 |
| 218975_at   | collagen, type V, alpha 3                                                      | COL5A3   | 0 | 0 | 1270.21 | 1.18 |
| 221268_s_at | sphingosine-1-phosphate phosphatase 1                                          | SGPP1    | 0 | 0 | 1277.24 | 1.10 |

|             |                                                                  |          |          |          |         |      |
|-------------|------------------------------------------------------------------|----------|----------|----------|---------|------|
| 39318_at    | T-cell leukemia/lymphoma 1A                                      | TCL1A    | 0        | 0        | 1288.39 | 1.47 |
| 217295_at   | mucin 8                                                          | MUC8     | 0        | 0        | 1291.13 | 1.21 |
| 219301_s_at | contactin associated protein-like 2                              | CNTNAP2  | 0        | 0        | 1293.74 | 1.39 |
| 209995_s_at | T-cell leukemia/lymphoma 1A                                      | TCL1A    | 0        | 0        | 1306.93 | 1.47 |
| 213674_x_at | immunoglobulin heavy constant gamma 1 (G1m marker)               | IGHG1    | 0        | 0        | 1334.25 | 1.46 |
| 52255_s_at  | collagen, type V, alpha 3                                        | COL5A3   | 0        | 0        | 1336.42 | 1.19 |
| 214537_at   | histone cluster 1, H1d                                           | HIST1H1D | 0        | 0        | 1341.42 | 1.28 |
| 209583_s_at | CD200 molecule                                                   | CD200    | 0        | 0        | 1348.33 | 1.36 |
| 212558_at   | sprouty homolog 1, antagonist of FGF signaling (Drosophila)      | SPRY1    | 0        | 0        | 1348.85 | 1.36 |
| 205594_at   | zinc finger protein 652                                          | ZNF652   | 0        | 0        | 1349.81 | 1.49 |
| 206700_s_at | jumonji, AT rich interactive domain 1D                           | JARID1D  | 0        | 0        | 1350.60 | 0.56 |
| 219671_at   | hippocalcin like 4                                               | HPCAL4   | 0        | 0        | 1372.25 | 1.50 |
| 206641_at   | tumor necrosis factor receptor superfamily, member 17            | TNFRSF17 | 0        | 0        | 1405.75 | 1.23 |
| 206492_at   | fragile histidine triad gene                                     | FHIT     | 0        | 0        | 1416.26 | 1.44 |
| 209706_at   | NK3 homeobox 1                                                   | NKX3-1   | 0        | 0        | 1430.14 | 1.03 |
| 207509_s_at | leukocyte-associated immunoglobulin-like receptor 2              | LAIR2    | 0        | 0        | 1430.73 | 1.33 |
| 203911_at   | RAP1 GTPase activating protein                                   | RAP1GAP  | 0        | 0        | 1432.33 | 1.27 |
| 209371_s_at | SH3-domain binding protein 2                                     | SH3BP2   | 0        | 0        | 1442.99 | 1.17 |
| 212768_s_at | olfactomedin 4                                                   | OLFM4    | 0        | 0        | 1471.99 | 1.04 |
| 203962_s_at | nebullette                                                       | NEBL     | 0        | 0        | 1481.45 | 1.20 |
| 218793_s_at | sex comb on midleg-like 1 (Drosophila)                           | SCML1    | 0        | 0        | 1481.71 | 1.25 |
| 207289_at   | matrix metalloproteinase 25                                      | MMP25    | 0        | 0        | 1490.41 | 1.34 |
| 205917_at   | zinc finger protein 264                                          | ZNF264   | 0        | 0        | 1504.92 | 1.37 |
| 219300_s_at | contactin associated protein-like 2                              | CNTNAP2  | 0        | 0        | 1506.67 | 1.29 |
| 215543_s_at | like-glycosyltransferase                                         | LARGE    | 0        | 0        | 1514.37 | 1.42 |
| 215621_s_at | immunoglobulin heavy constant gamma 1 (G1m marker)               | IGHG1    | 0        | 0        | 1523.92 | 1.37 |
| 221771_s_at | M-phase phosphoprotein 8                                         | MPHOSPH8 | 0        | 0        | 1526.13 | 1.34 |
| 210121_at   | UDP-Gal:betaGlcNAc beta 1,3-galactosyltransferase, polypeptide 2 | B3GALT2  | 0        | 0        | 1527.71 | 1.38 |
| 206851_at   | ribonuclease, RNase A family, 3 (eosinophil cationic protein)    | RNASE3   | 0        | 0        | 1548.77 | 1.19 |
| 218345_at   | transmembrane protein 176A                                       | TMEM176A | 0        | 0        | 1567.01 | 0.88 |
| 214945_at   | family with sequence similarity 153, member B                    | FAM153B  | 0        | 0        | 1568.07 | 1.34 |
| 214407_x_at | glycophorin B (MNS blood group)                                  | GYPB     | 1.45E-06 | 3.03E-04 | 1577.94 | 1.29 |
| 215242_at   | phosphatidylinositol glycan anchor biosynthesis, class C         | PIGC     | 2.17E-06 | 4.29E-04 | 1582.29 | 1.04 |
| 205000_at   | DEAD (Asp-Glu-Ala-Asp) box polypeptide 3, Y-linked               | DDX3Y    | 2.17E-06 | 4.29E-04 | 1583.06 | 0.56 |
| 214180_at   | mannosidase, alpha, class 1C, member 1                           | MAN1C1   | 2.17E-06 | 4.29E-04 | 1589.41 | 1.48 |

|             |                                                                      |         |          |          |         |      |
|-------------|----------------------------------------------------------------------|---------|----------|----------|---------|------|
| 205238_at   | chromosome X open reading frame 34                                   | CXorf34 | 2.17E-06 | 4.29E-04 | 1591.42 | 1.32 |
| 215761_at   | Dmx-like 2                                                           | DMXL2   | 2.90E-06 | 5.13E-04 | 1600.27 | 1.35 |
| 215892_at   | zinc finger protein 440                                              | ZNF440  | 2.90E-06 | 5.13E-04 | 1601.37 | 1.38 |
| 220068_at   | pre-B lymphocyte gene 3                                              | VPREB3  | 2.90E-06 | 5.13E-04 | 1602.28 | 1.42 |
| 213268_at   | calmodulin binding transcription activator 1                         | CAMTA1  | 2.90E-06 | 5.13E-04 | 1609.06 | 1.26 |
| 204409_s_at | eukaryotic translation initiation factor 1A, Y-linked                | EIF1AY  | 2.90E-06 | 5.13E-04 | 1639.00 | 0.55 |
| 210548_at   | chemokine (C-C motif) ligand 23                                      | CCL23   | 2.90E-06 | 5.13E-04 | 1642.99 | 1.09 |
| 206873_at   | carbonic anhydrase VI                                                | CA6     | 2.90E-06 | 5.13E-04 | 1645.34 | 1.37 |
| 219389_at   | sushi domain containing 4                                            | SUSD4   | 2.90E-06 | 5.13E-04 | 1651.28 | 1.37 |
| 205389_s_at | ankyrin 1, erythrocytic                                              | ANK1    | 3.62E-06 | 6.25E-04 | 1662.21 | 1.24 |
| 216002_at   | not yet annotated                                                    | NA      | 3.62E-06 | 6.25E-04 | 1662.80 | 1.26 |
| 206310_at   | serine peptidase inhibitor, Kazal type 2 (acrosin-trypsin inhibitor) | SPINK2  | 4.35E-06 | 6.59E-04 | 1669.91 | 1.35 |
| 208450_at   | lectin, galactoside-binding, soluble, 2                              | LGALS2  | 4.35E-06 | 6.59E-04 | 1671.14 | 1.16 |
| 203038_at   | protein tyrosine phosphatase, receptor type, K                       | PTPRK   | 4.35E-06 | 6.59E-04 | 1671.72 | 1.33 |
| 201406_at   | ribosomal protein L36a                                               | RPL36A  | 4.35E-06 | 6.59E-04 | 1672.52 | 1.18 |
| 210718_s_at | ADP-ribosylation factor-like 17 pseudogene 1                         | ARL17P1 | 4.35E-06 | 6.59E-04 | 1673.08 | 1.20 |
| 215786_at   | not yet annotated                                                    | NA      | 4.35E-06 | 6.59E-04 | 1673.85 | 1.41 |
| 216247_at   | ribosomal protein S20                                                | RPS20   | 4.35E-06 | 6.59E-04 | 1675.94 | 1.31 |
| 201295_s_at | WD repeat and SOCS box-containing 1                                  | WSB1    | 4.35E-06 | 6.59E-04 | 1681.11 | 1.17 |
| 210549_s_at | chemokine (C-C motif) ligand 23                                      | CCL23   | 4.35E-06 | 6.59E-04 | 1688.98 | 1.11 |
| 201909_at   | ribosomal protein S4, Y-linked 1                                     | RPS4Y1  | 4.35E-06 | 6.59E-04 | 1690.66 | 0.48 |
| 202904_s_at | LSM5 homolog, U6 small nuclear RNA associated (S. cerevisiae)        | LSM5    | 4.35E-06 | 6.59E-04 | 1697.36 | 1.34 |
| 220059_at   | signal transducing adaptor family member 1                           | STAP1   | 5.80E-06 | 8.08E-04 | 1721.83 | 1.34 |
| 205110_s_at | fibroblast growth factor 13                                          | FGF13   | 5.80E-06 | 8.08E-04 | 1722.94 | 1.00 |
| 210701_at   | craniofacial development protein 1                                   | CFDP1   | 5.80E-06 | 8.08E-04 | 1724.30 | 1.40 |
| 207063_at   | chromosome Y open reading frame 14                                   | CYorf14 | 5.80E-06 | 8.08E-04 | 1735.98 | 0.96 |
| 220085_at   | helicase, lymphoid-specific                                          | HELLS   | 5.80E-06 | 8.08E-04 | 1737.70 | 1.40 |
| 221170_at   | histamine receptor H4                                                | HRH4    | 5.80E-06 | 8.08E-04 | 1750.48 | 1.23 |
| 215133_s_at | family with sequence similarity 153, member B                        | FAM153B | 5.80E-06 | 8.08E-04 | 1751.77 | 1.35 |
| 219672_at   | erythroid associated factor                                          | ERAF    | 5.80E-06 | 8.08E-04 | 1752.58 | 1.15 |
| 222375_at   | not yet annotated                                                    | NA      | 6.52E-06 | 8.65E-04 | 1763.25 | 1.27 |
| 219815_at   | galactose-3-O-sulfotransferase 4                                     | GAL3ST4 | 6.52E-06 | 8.65E-04 | 1765.45 | 1.40 |
| 203088_at   | fibulin 5                                                            | FBLN5   | 6.52E-06 | 8.65E-04 | 1766.94 | 1.28 |
| 216133_at   | T cell receptor alpha locus                                          | TRA@    | 6.52E-06 | 8.65E-04 | 1769.49 | 1.38 |
| 216022_at   | not yet annotated                                                    | NA      | 6.52E-06 | 8.65E-04 | 1769.99 | 1.33 |
| 217422_s_at | CD22 molecule                                                        | CD22    | 7.24E-06 | 9.52E-04 | 1783.28 | 1.38 |



|             |                                                                            |           |          |             |         |      |
|-------------|----------------------------------------------------------------------------|-----------|----------|-------------|---------|------|
| 38521_at    | CD22 molecule                                                              | CD22      | 7.97E-06 | 0.001009174 | 1799.78 | 1.37 |
| 213831_at   | major histocompatibility complex, class II, DQ alpha 1                     | HLA-DQA1  | 7.97E-06 | 0.001009174 | 1800.71 | 0.37 |
| 207434_s_at | FXYD domain containing ion transport regulator 2                           | FXYD2     | 7.97E-06 | 0.001009174 | 1805.06 | 1.32 |
| 37462_i_at  | splicing factor 3a, subunit 2, 66kDa                                       | SF3A2     | 7.97E-06 | 0.001009174 | 1811.72 | 1.24 |
| 214012_at   | endoplasmic reticulum aminopeptidase 1                                     | ERAP1     | 8.69E-06 | 0.001081081 | 1812.83 | 1.12 |
| 215768_at   | not yet annotated                                                          | NA        | 8.69E-06 | 0.001081081 | 1815.89 | 1.19 |
| 209602_s_at | GATA binding protein 3                                                     | GATA3     | 1.09E-05 | 0.001339286 | 1833.19 | 1.32 |
| 220729_at   | not yet annotated                                                          | NA        | 1.16E-05 | 0.001415929 | 1836.59 | 1.14 |
| 204581_at   | CD22 molecule                                                              | CD22      | 1.30E-05 | 0.001565217 | 1845.65 | 1.37 |
| 207979_s_at | CD8b molecule                                                              | CD8B      | 1.30E-05 | 0.001565217 | 1871.50 | 1.30 |
| 213994_s_at | spondin 1, extracellular matrix protein                                    | SPON1     | 1.45E-05 | 0.001724138 | 1876.53 | 1.34 |
| 205624_at   | carboxypeptidase A3 (mast cell)                                            | CPA3      | 1.52E-05 | 0.001735537 | 1884.04 | 0.90 |
| 216763_at   | KN motif and ankyrin repeat domains 1                                      | KANK1     | 1.52E-05 | 0.001735537 | 1885.04 | 1.24 |
| 219215_s_at | solute carrier family 39 (zinc transporter), member 4                      | SLC39A4   | 1.52E-05 | 0.001735537 | 1888.51 | 1.34 |
| 202286_s_at | tumor-associated calcium signal transducer 2                               | TACSTD2   | 1.52E-05 | 0.001735537 | 1888.54 | 0.94 |
| 205372_at   | pleiomorphic adenoma gene 1                                                | PLAG1     | 1.52E-05 | 0.001735537 | 1890.74 | 1.25 |
| 206606_at   | lipase, hepatic                                                            | LIPC      | 1.59E-05 | 0.00176     | 1893.08 | 1.28 |
| 216833_x_at | glycophorin B (MNS blood group)                                            | GYPB      | 1.59E-05 | 0.00176     | 1895.37 | 1.25 |
| 215956_at   | not yet annotated                                                          | NA        | 1.59E-05 | 0.00176     | 1901.20 | 1.28 |
| 205674_x_at | FXYD domain containing ion transport regulator 2                           | FXYD2     | 1.59E-05 | 0.00176     | 1904.65 | 1.35 |
| 211149_at   | ubiquitously transcribed tetratricopeptide repeat gene, Y-linked           | UTY       | 1.67E-05 | 0.001825397 | 1906.79 | 0.61 |
| 221747_at   | tensin 1                                                                   | TNS1      | 1.88E-05 | 0.002015504 | 1920.41 | 1.12 |
| 210854_x_at | solute carrier family 6 (neurotransmitter transporter, creatine), member 8 | SLC6A8    | 1.88E-05 | 0.002015504 | 1921.63 | 1.06 |
| 214997_at   | golgi autoantigen, golgin subfamily a, 1                                   | GOLGA1    | 1.88E-05 | 0.002015504 | 1921.84 | 1.39 |
| 213843_x_at | solute carrier family 6 (neurotransmitter transporter, creatine), member 8 | SLC6A8    | 1.96E-05 | 0.002061069 | 1929.31 | 1.07 |
| 214731_at   | CTTNBP2 N-terminal like                                                    | CTTNBP2NL | 1.96E-05 | 0.002061069 | 1933.62 | 1.32 |
| 205900_at   | keratin 1                                                                  | KRT1      | 2.10E-05 | 0.002101449 | 1936.58 | 0.94 |
| 219846_at   | gon-4-like (C. elegans)                                                    | GON4L     | 2.10E-05 | 0.002101449 | 1937.43 | 1.35 |
| 220784_s_at | urotensin 2                                                                | UTS2      | 2.10E-05 | 0.002101449 | 1943.80 | 1.29 |
| 219308_s_at | adenylate kinase 5                                                         | AK5       | 2.10E-05 | 0.002101449 | 1945.58 | 1.34 |
| 214877_at   | CDK5 regulatory subunit associated protein 1-like 1                        | CDKAL1    | 2.10E-05 | 0.002101449 | 1951.73 | 1.14 |
| 215555_at   | not yet annotated                                                          | NA        | 2.10E-05 | 0.002101449 | 1953.09 | 1.31 |
| 209066_x_at | ubiquinol-cytochrome c reductase binding protein                           | UQCRB     | 2.10E-05 | 0.002101449 | 1958.85 | 1.09 |
| 205802_at   | transient receptor potential cation channel, subfamily C, member 1         | TRPC1     | 2.17E-05 | 0.002112676 | 1961.49 | 1.13 |

|             |                                                                                               |              |          |             |         |      |
|-------------|-----------------------------------------------------------------------------------------------|--------------|----------|-------------|---------|------|
| 207815_at   | platelet factor 4 variant 1                                                                   | PF4V1        | 2.17E-05 | 0.002112676 | 1962.95 | 1.09 |
| 206478_at   | KIAA0125                                                                                      | KIAA0125     | 2.17E-05 | 0.002112676 | 1967.15 | 1.28 |
| 222101_s_at | dachsous 1 (Drosophila)                                                                       | DCHS1        | 2.17E-05 | 0.002112676 | 1968.11 | 1.28 |
| 213846_at   | cytochrome c oxidase subunit VIIc                                                             | COX7C        | 2.32E-05 | 0.002237762 | 1977.92 | 1.17 |
| 219629_at   | family with sequence similarity 118, member A                                                 | FAM118A      | 2.39E-05 | 0.002275862 | 1982.50 | 1.04 |
| 205803_s_at | transient receptor potential cation channel, subfamily C, member 1                            | TRPC1        | 2.39E-05 | 0.002275862 | 1983.15 | 1.05 |
| 216067_at   | not yet annotated                                                                             | NA           | 2.61E-05 | 0.002465753 | 1987.71 | 1.27 |
| 211310_at   | enhancer of zeste homolog 1 (Drosophila)                                                      | EZH1         | 2.75E-05 | 0.002585034 | 1993.58 | 1.36 |
| 204410_at   | eukaryotic translation initiation factor 1A, Y-linked                                         | EIF1AY       | 3.12E-05 | 0.002905405 | 2004.20 | 0.59 |
| 211645_x_at | not yet annotated                                                                             | NA           | 3.19E-05 | 0.00295302  | 2014.22 | 1.21 |
| 210756_s_at | Notch homolog 2 (Drosophila)                                                                  | NOTCH2       | 3.26E-05 | 0.002980132 | 2024.31 | 1.28 |
| 211643_x_at | immunoglobulin kappa constant                                                                 | IGKC         | 3.26E-05 | 0.002980132 | 2027.25 | 1.25 |
| 220820_at   | not yet annotated                                                                             | NA           | 3.33E-05 | 0.003006536 | 2029.46 | 1.30 |
| 221428_s_at | transducin (beta)-like 1 X-linked receptor 1                                                  | TBL1XR1      | 3.33E-05 | 0.003006536 | 2030.01 | 0.88 |
| 206398_s_at | CD19 molecule                                                                                 | CD19         | 3.40E-05 | 0.003051948 | 2034.81 | 1.30 |
| 205544_s_at | complement component (3d/Epstein Barr virus) receptor 2                                       | CR2          | 3.48E-05 | 0.003076923 | 2036.66 | 1.29 |
| 207681_at   | chemokine (C-X-C motif) receptor 3                                                            | CXCR3        | 3.48E-05 | 0.003076923 | 2036.94 | 1.30 |
| 209883_at   | glycosyltransferase 25 domain containing 2                                                    | GLT25D2      | 3.55E-05 | 0.003121019 | 2042.43 | 1.20 |
| 213172_at   | tetratricopeptide repeat domain 9                                                             | TTC9         | 3.62E-05 | 0.003164557 | 2044.84 | 1.33 |
| 212805_at   | similar to KIAA0367                                                                           | LOC100129762 | 3.84E-05 | 0.0033125   | 2050.93 | 1.07 |
| 212190_at   | serpin peptidase inhibitor, clade E (nexin, plasminogen activator inhibitor type 1), member 2 | SERPINE2     | 3.84E-05 | 0.0033125   | 2055.43 | 1.27 |
| 208650_s_at | CD24 molecule                                                                                 | CD24         | 3.98E-05 | 0.003416149 | 2057.55 | 1.24 |
| 213922_at   | tau tubulin kinase 2                                                                          | TTBK2        | 4.20E-05 | 0.003515152 | 2060.91 | 1.36 |
| 220637_at   | family with sequence similarity 124B                                                          | FAM124B      | 4.20E-05 | 0.003515152 | 2062.36 | 1.24 |
| 220494_s_at | not yet annotated                                                                             | NA           | 4.20E-05 | 0.003515152 | 2063.69 | 1.09 |
| 209807_s_at | nuclear factor I/X (CCAAT-binding transcription factor)                                       | NFIX         | 4.20E-05 | 0.003515152 | 2065.51 | 1.09 |
| 219315_s_at | transmembrane protein 204                                                                     | TMEM204      | 4.27E-05 | 0.003532934 | 2066.26 | 1.33 |
| 74694_s_at  | rabaptin, RAB GTPase binding effector protein 2                                               | RABEP2       | 4.27E-05 | 0.003532934 | 2066.42 | 1.30 |
| 217647_at   | not yet annotated                                                                             | NA           | 4.42E-05 | 0.003609468 | 2069.88 | 1.39 |
| 221477_s_at | superoxide dismutase 2, mitochondrial                                                         | SOD2         | 4.42E-05 | 0.003609468 | 2073.28 | 1.17 |
| 217397_at   | T cell receptor alpha locus                                                                   | TRA@         | 4.64E-05 | 0.003657143 | 2088.15 | 1.29 |
| 201151_s_at | muscleblind-like (Drosophila)                                                                 | MBNL1        | 4.64E-05 | 0.003657143 | 2088.44 | 0.98 |
| 203476_at   | trophoblast glycoprotein                                                                      | TPBG         | 4.64E-05 | 0.003657143 | 2089.94 | 1.20 |
| 222253_s_at | POM121-like protein                                                                           | DKFZP434P211 | 4.64E-05 | 0.003657143 | 2090.52 | 1.15 |
| 207459_x_at | glycophorin B (MNS blood group)                                                               | GYPB         | 4.64E-05 | 0.003657143 | 2091.80 | 1.18 |
| 209381_x_at | splicing factor 3a, subunit 2, 66kDa                                                          | SF3A2        | 4.64E-05 | 0.003657143 | 2094.31 | 1.20 |

|             |                                                                                          |              |          |             |         |      |
|-------------|------------------------------------------------------------------------------------------|--------------|----------|-------------|---------|------|
| 206088_at   | leucine rich repeat containing 37A                                                       | LRRC37A      | 4.85E-05 | 0.003806818 | 2097.24 | 1.18 |
| 206624_at   | ubiquitin specific peptidase 9, Y-linked (fat facets-like, Drosophila)                   | USP9Y        | 4.93E-05 | 0.003841808 | 2100.00 | 0.69 |
| 78383_at    | similar to hCG1811779                                                                    | LOC100129250 | 5.14E-05 | 0.003988764 | 2103.08 | 1.33 |
| 214666_x_at | iron-responsive element binding protein 2                                                | IREB2        | 5.22E-05 | 0.003956044 | 2108.86 | 1.15 |
| 210744_s_at | interleukin 5 receptor, alpha                                                            | IL5RA        | 5.22E-05 | 0.003956044 | 2109.45 | 1.14 |
| 213804_at   | inositol polyphosphate-5-phosphatase, 75kDa                                              | INPP5B       | 5.22E-05 | 0.003956044 | 2113.64 | 1.35 |
| 217539_at   | chromosome 18 open reading frame 25                                                      | C18orf25     | 5.22E-05 | 0.003956044 | 2114.26 | 1.32 |
| 216401_x_at | similar to Ig kappa chain V-I region HK102 precursor                                     | LOC652493    | 5.29E-05 | 0.003924731 | 2116.63 | 1.26 |
| 206171_at   | adenosine A3 receptor                                                                    | ADORA3       | 5.29E-05 | 0.003924731 | 2116.97 | 1.12 |
| 209816_at   | patched homolog 1 (Drosophila)                                                           | PTCH1        | 5.29E-05 | 0.003924731 | 2120.32 | 1.18 |
| 211343_s_at | collagen, type XIII, alpha 1                                                             | COL13A1      | 5.29E-05 | 0.003924731 | 2121.77 | 1.27 |
| 209662_at   | centrin, EF-hand protein, 3 (CDC31 homolog, yeast)                                       | CETN3        | 5.36E-05 | 0.00393617  | 2125.17 | 1.09 |
| 215812_s_at | solute carrier family 6 (neurotransmitter transporter, creatine), member 10 (pseudogene) | SLC6A10P     | 5.36E-05 | 0.00393617  | 2125.32 | 1.04 |
| 207520_at   | TROVE domain family, member 2                                                            | TROVE2       | 5.72E-05 | 0.004179894 | 2132.17 | 1.20 |
| 208428_at   | transporter 2, ATP-binding cassette, sub-family B (MDR/TAP)                              | TAP2         | 5.94E-05 | 0.004315789 | 2135.72 | 1.14 |
| 215648_at   | not yet annotated                                                                        | NA           | 6.01E-05 | 0.004322917 | 2138.06 | 1.31 |
| 205049_s_at | CD79a molecule, immunoglobulin-associated alpha                                          | CD79A        | 6.01E-05 | 0.004322917 | 2138.08 | 1.28 |
| 201754_at   | cytochrome c oxidase subunit VIc                                                         | COX6C        | 6.23E-05 | 0.004410257 | 2142.04 | 1.11 |
| 209480_at   | major histocompatibility complex, class II, DQ beta 1                                    | HLA-DQB1     | 6.23E-05 | 0.004410257 | 2142.25 | 0.42 |
| 211106_at   | not yet annotated                                                                        | NA           | 6.23E-05 | 0.004410257 | 2142.87 | 1.28 |
| 209871_s_at | amyloid beta (A4) precursor protein-binding, family A, member 2                          | APBA2        | 6.37E-05 | 0.004489796 | 2146.96 | 1.37 |
| 213534_s_at | PAS domain containing serine/threonine kinase                                            | PASK         | 6.66E-05 | 0.004646465 | 2149.68 | 1.27 |
| 34478_at    | RAB11B, member RAS oncogene family                                                       | RAB11B       | 6.66E-05 | 0.004646465 | 2149.81 | 1.25 |
| 205732_s_at | nuclear receptor coactivator 2                                                           | NCOA2        | 6.81E-05 | 0.0047      | 2151.61 | 1.07 |
| 204612_at   | protein kinase (cAMP-dependent, catalytic) inhibitor alpha                               | PKIA         | 6.81E-05 | 0.0047      | 2153.24 | 1.29 |
| 214973_x_at | immunoglobulin heavy constant delta                                                      | IGHD         | 6.95E-05 | 0.004752475 | 2153.53 | 1.28 |
| 205950_s_at | carbonic anhydrase I                                                                     | CA1          | 6.95E-05 | 0.004752475 | 2154.85 | 1.08 |
| 203178_at   | glycine amidinotransferase (L-arginine:glycine amidinotransferase)                       | GATM         | 7.10E-05 | 0.004803922 | 2156.97 | 1.18 |
| 220177_s_at | transmembrane protease, serine 3                                                         | TMPRSS3      | 7.10E-05 | 0.004803922 | 2157.01 | 1.29 |
| 215176_x_at | netrin 2-like (chicken)                                                                  | NTN2L        | 7.17E-05 | 0.004782609 | 2157.90 | 1.23 |
| 211517_s_at | interleukin 5 receptor, alpha                                                            | IL5RA        | 7.17E-05 | 0.004782609 | 2159.27 | 1.15 |
| 216576_x_at | netrin 2-like (chicken)                                                                  | NTN2L        | 7.17E-05 | 0.004782609 | 2160.55 | 1.20 |
| 206507_at   | zinc finger and SCAN domain containing 12                                                | ZSCAN12      | 7.46E-05 | 0.004951923 | 2164.55 | 1.28 |
