# Supplementary material for: Blood transcriptomics of drug-naïve sporadic Parkinson’s disease patients
Source: PubMed Central journal article supplement (PMC4625854; doi:10.1186/s12864-015-2058-3), 2015-10-28
Supplement: 12864_2015_2058_MOESM9_ESM.pdf [file 12864_2015_2058_MOESM9_ESM.pdf]

**Additional file 9. List of common differentially expressed genes between PD patients and controls based on SAM and PUMA analyses and the 395 selected variables of the Ranking-PCA.** Genes are ranked according to the P- values based on PUMA analysis. Order of the 395 variables, Affymetrix Probe Set IDs, gene symbols and names are indicated. Names shown in bold indicate transcripts validated by RT-qPCR (Figure 2a).

| Affymetrix ID      | Gene symbol   | Gene name                                                                                            | P-value         | PUMA: Ratio  | SAM: Ratio   | Order      |
|--------------------|---------------|------------------------------------------------------------------------------------------------------|-----------------|--------------|--------------|------------|
| <b>209715_at</b>   | <b>CBX5</b>   | <b>chromobox homolog 5 (HP1 alpha homolog, Drosophila)</b>                                           | <b>5.67E-08</b> | <b>-1.38</b> | <b>-1.35</b> | <b>1</b>   |
| 208893_s_at        | dup6          | dual specificity phosphatase 6                                                                       | 7.48E-05        | 1.37         | 1.37         | 8          |
| <b>209153_s_at</b> | <b>tcf3</b>   | <b>transcription factor 3 (E2A immunoglobulin enhancer binding factors E12/E47)</b>                  | <b>8.62E-05</b> | <b>-1.26</b> | <b>-1.33</b> | <b>7</b>   |
| 213006_at          | cebpd         | CCAAT/enhancer binding protein (C/EBP), delta                                                        | 1.28E-04        | 1.31         | 1.35         | 81         |
| 203658_at          | SLC25A20      | solute carrier family 25 (carnitine/acylcarnitine translocase), member 20                            | 1.32E-04        | 1.26         | 1.29         | 34         |
| 202436_s_at        | CYP1B1        | cytochrome P450, family 1, subfamily B, polypeptide 1                                                | 1.97E-04        | 1.44         | 1.48         | 19         |
| 204530_s_at        | Tox           | thymocyte selection-associated high mobility group box                                               | 2.42E-04        | 1.29         | 1.29         | 220        |
| <b>215151_at</b>   | <b>dock10</b> | <b>dedicator of cytokinesis 10</b>                                                                   | <b>2.47E-04</b> | <b>-1.23</b> | <b>-1.26</b> | <b>128</b> |
| 221592_at          | TBC1D8        | TBC1 domain family, member 8 (with GRAM domain)                                                      | 2.48E-04        | 1.28         | 1.33         | 9          |
| 219025_at          | CD248         | CD248 molecule, endosialin                                                                           | 2.84E-04        | -2.17        | -1.30        | 31         |
| <b>214180_at</b>   | <b>MAN1C1</b> | <b>mannosidase, alpha, class 1C, member 1</b>                                                        | <b>2.95E-04</b> | <b>-1.37</b> | <b>-1.39</b> | <b>40</b>  |
| 213435_at          | SATB2         | SATB homeobox 2                                                                                      | 3.65E-04        | 1.59         | 1.67         | 149        |
| 210607_at          | FLT3LG        | fms-related tyrosine kinase 3 ligand                                                                 | 3.97E-04        | -1.35        | -1.34        | 18         |
| 205594_at          | ZNF652        | zinc finger protein 652                                                                              | 4.20E-04        | -1.41        | -1.57        | 33         |
| 205530_at          | Etfdh         | electron-transferring-flavoprotein dehydrogenase                                                     | 4.93E-04        | 1.19         | 1.22         | 24         |
| 201013_s_at        | paics         | phosphoribosylaminoimidazole carboxylase, phosphoribosylaminoimidazole succinocarboxamide synthetase | 4.98E-04        | -1.16        | -1.21        | 97         |
| 210847_x_at        | TNFRSF25      | tumor necrosis factor receptor superfamily, member 25                                                | 5.03E-04        | -1.26        | -1.29        | 12         |
| 214739_at          | LRCH3         | leucine-rich repeats and calponin homology (CH) domain containing 3                                  | 6.26E-04        | -1.17        | -1.25        | 6          |
| 212996_s_at        | URB1          | URB1 ribosome biogenesis 1 homolog (S. cerevisiae)                                                   | 6.26E-04        | -1.24        | -1.28        | 163        |
| 213666_at          | Sept6         | septin 6                                                                                             | 8.53E-04        | -1.21        | -1.24        | 153        |
| 217647_at          | dhodh         | dihydroorotate dehydrogenase                                                                         | 9.45E-04        | -1.36        | -1.43        | 36         |
| 215750_at          | KIAA1659      | KIAA1659 protein                                                                                     | 9.86E-04        | -1.32        | -1.53        | 2          |
| 220609_at          | LOC202181     | hypothetical protein LOC202181                                                                       | 1.11E-03        | -1.19        | -1.24        | 47         |
| 218693_at          | tspan15       | tetraspanin 15                                                                                       | 1.11E-03        | -1.40        | -1.36        | 57         |
| 207339_s_at        | LTB           | lymphotoxin beta (TNF superfamily, member 3)                                                         | 1.15E-03        | -1.22        | -1.26        | 3          |
| 219671_at          | HPCAL4        | hippocalcin like 4                                                                                   | 1.22E-03        | -1.37        | -1.51        | 37         |
| 203630_s_at        | COG5          | component of oligomeric golgi complex 5                                                              | 1.29E-03        | -1.25        | -1.28        | 114        |
| 202658_at          | PEX11B        | peroxisomal biogenesis factor 11 beta                                                                | 1.43E-03        | -1.12        | -1.13        | 158        |
| 214661_s_at        | NOPI4         | NOPI4 nucleolar protein homolog (yeast)                                                              | 1.57E-03        | -1.17        | -1.20        | 16         |
| 211310_at          | EZH1          | enhancer of zeste homolog 1 (Drosophila)                                                             | 1.73E-03        | -1.27        | -1.29        | 346        |
| 31637_s_at         | thrA          | thyroid hormone receptor, alpha (erythroblastic leukemia viral (v-erb-a) oncogene homolog, avian)    | 1.97E-03        | -1.29        | -1.39        | 23         |
| 212831_at          | MEGF9         | multiple EGF-like-domains 9                                                                          | 2.03E-03        | 1.20         | 1.29         | 41         |
| 217645_at          | COX16         | COX16 cytochrome c oxidase assembly homolog (S. cerevisiae)                                          | 2.05E-03        | -1.23        | -1.28        | 78         |
| 203825_at          | BRD3          | bromodomain containing 3                                                                             | 2.58E-03        | -1.21        | -1.23        | 68         |
| 213963_s_at        | SAP30         | Sin3A-associated protein, 30kDa                                                                      | 2.76E-03        | 1.28         | 1.35         | 13         |
| 222348_at          | MAST4         | microtubule associated serine/threonine kinase family member 4                                       | 3.00E-03        | -1.21        | -1.31        | 22         |
| 219315_s_at        | TMEM204       | transmembrane protein 204                                                                            | 3.30E-03        | -1.27        | -1.36        | 125        |
| 213804_at          | INPP5B        | inositol polyphosphate-5-phosphatase, 75kDa                                                          | 3.50E-03        | -1.26        | -1.34        | 58         |
| 220215_at          | ZNF669        | zinc finger protein 669                                                                              | 4.16E-03        | -1.14        | -1.20        | 61         |
| 207078_at          | MED6          | mediator complex subunit 6                                                                           | 4.40E-03        | -1.20        | -1.27        | 46         |
| 215390_at          | c9orf5        | chromosome 9 open reading frame 5                                                                    | 4.79E-03        | -1.46        | -1.65        | 121        |
| 222027_at          | Nucks1        | nuclear casein kinase and cyclin-dependent                                                           | 4.94E-03        | -1.19        | -1.27        | 120        |

|             |               |                                                   |          |       |       |     |
|-------------|---------------|---------------------------------------------------|----------|-------|-------|-----|
|             |               | kinase substrate 1                                |          |       |       |     |
| 219846_at   | YY1AP1//GON4L | YY1 associated protein 1; gon-4-like (C. elegans) | 5.21E-03 | -1.28 | -1.39 | 87  |
| 206413_s_at | TCL6          | T-cell leukemia/lymphoma 6                        | 5.25E-03 | -1.46 | -1.23 | 29  |
| 221101_at   | C14ORF113     | chromosome 14 open reading frame 113              | 5.76E-03 | -1.55 | -1.50 | 132 |
| 222141_at   | Klhl22        | kelch-like 22 (Drosophila)                        | 5.90E-03 | -1.17 | -1.21 | 95  |
| 206761_at   | Cd96          | CD96 molecule                                     | 6.00E-03 | -1.25 | -1.27 | 71  |
| 220085_at   | Hells         | helicase, lymphoid-specific                       | 6.10E-03 | -1.27 | -1.35 | 51  |
| 212414_s_at | Sept6         | septin 6                                          | 6.60E-03 | -1.14 | -1.19 | 77  |
| 41113_at    | ZNF500        | zinc finger protein 500                           | 6.78E-03 | -1.15 | -1.18 | 44  |
| 203226_s_at | Tspan31       | tetraspanin 31                                    | 7.42E-03 | -1.12 | -1.19 | 151 |
| 215786_at   | rsf1          | remodeling and spacing factor 1                   | 8.66E-03 | -1.26 | -1.39 | 90  |
| 217995_at   | SQRDL         | sulfide quinone reductase-like (yeast)            | 9.81E-03 | 1.12  | 1.17  | 85  |
| 213340_s_at | KIAA0495      | KIAA0495                                          | 9.94E-03 | -1.11 | -1.15 | 109 |
