# Supplementary material for: Blood transcriptomics of drug-naïve sporadic Parkinson’s disease patients
Source: PubMed Central journal article supplement (PMC4625854; doi:10.1186/s12864-015-2058-3), 2015-10-28
Supplement: 12864_2015_2058_MOESM10_ESM.pdf [file 12864_2015_2058_MOESM10_ESM.pdf]

**Additional file 10. List of common genes between A9 dopaminergic neurons of the SN in the mouse and differentially expressed transcripts in the blood of PD patients according to SAM (a) and PUMA (b).**

(a)

| <b>Common A9 and SAM analysis</b> |
|-----------------------------------|
| ACACA                             |
| APBA2                             |
| BRD3                              |
| CBX5                              |
| CFDP1                             |
| CORO2B                            |
| DUSP6                             |
| ELOVL4                            |
| ENC1                              |
| ETFDH                             |
| EZH1                              |
| GLTSCR2                           |
| GOLGA1                            |
| GRSF1                             |
| HPCAL4                            |
| ID3                               |
| INPP5B                            |
| KLC2                              |
| KLHL22                            |
| LRRN3                             |
| MAN1C1                            |
| MCCC2                             |
| MCF2L                             |
| MED6                              |
| MEGF9                             |
| NMT2                              |
| NOL14                             |
| NPAS2                             |
| NUCKS1                            |
| OSBPL9                            |
| PAICS                             |
| PAIP2B                            |
| POLE3                             |
| RFX3                              |
| RSF1                              |
| SALL2                             |
| SAP30                             |
| SEPT6                             |
| SLC11A2                           |
| SLC25A20                          |
| SQRDL                             |
| TBC1D8                            |
| THRA                              |
| TOPORS                            |
| TOX                               |
| TSC22D3                           |

|         |
|---------|
| TSPAN15 |
| TSPAN31 |
| TTBK2   |

(b)

| <b>Common A9 and co-expression analysis</b> |
|---------------------------------------------|
| AASDHPPT                                    |
| ABLIM1                                      |
| ACACA                                       |
| ACSBG1                                      |
| AHCYL1                                      |
| ALG8                                        |
| ANKRD57                                     |
| APBA2                                       |
| APLP2                                       |
| B3GALT2                                     |
| BAALC                                       |
| BDH1                                        |
| BRD3                                        |
| CBX5                                        |
| CBY1                                        |
| CCDC85B                                     |
| CCDC9                                       |
| CHD3                                        |
| CMKLR1                                      |
| CNNM4                                       |
| CORO2B                                      |
| CREM                                        |
| CRIP2                                       |
| CSNK2A1                                     |
| CTSZ                                        |
| DDX51                                       |
| DLGAP4                                      |
| DPYSL3                                      |
| DTNB                                        |
| DUSP1                                       |
| DUSP6                                       |
| ELOVL4                                      |
| ENC1                                        |
| ETFDH                                       |
| EXT1                                        |
| EZH1                                        |
| FEM1B                                       |
| FGFR1OP                                     |
| FKBP5                                       |
| GJB3                                        |
| GNAO1                                       |
| GOLGA1                                      |
| GPR17                                       |
| H2AFY                                       |
| HDAC6                                       |
| HERPUD1                                     |
| HIP1R                                       |
| HMGA1                                       |

|         |
|---------|
| HPCAL4  |
| ICAM1   |
| IL21R   |
| ING1    |
| INPP4A  |
| INPP4B  |
| INPP5B  |
| INTS1   |
| KCND2   |
| KCNK1   |
| KCNMA1  |
| KIF1C   |
| KLC2    |
| KLHL22  |
| KPNA6   |
| LARP5   |
| LRRN3   |
| LUZP2   |
| MAN1C1  |
| MCF2L   |
| MECP2   |
| MED6    |
| MEGF9   |
| METTL1  |
| MGAT5   |
| MICAL3  |
| MLLT10  |
| MYO5A   |
| MYO6    |
| NBL1    |
| NF1     |
| NMT2    |
| NOL9    |
| NPM3    |
| NR4A2   |
| NRG1    |
| NUAK1   |
| NUCKS1  |
| NUDT6   |
| NUP50   |
| OSBPL1A |
| PAICS   |
| PCBP1   |
| PCDH17  |
| PCNX    |
| PDLIM5  |
| PDXDC1  |
| PHIP    |
| PLOD1   |
| POU3F1  |
| PPAN    |
| PPP1R9A |
| PTPRR   |
| PUS1    |
| RAP2A   |

|          |
|----------|
| RAP2B    |
| RBM15B   |
| RRBP1    |
| RUFY3    |
| S1PR2    |
| SAP30    |
| SEPT6    |
| SGTA     |
| SIN3B    |
| SLC22A17 |
| SLC25A20 |
| SMAD1    |
| SOCS7    |
| SON      |
| SPON1    |
| SPTLC2   |
| SQRDL    |
| ST3GAL6  |
| TBC1D8   |
| TCF7     |
| THRA     |
| TLE4     |
| TMEM204  |
| TNPO1    |
| TOX      |
| TRPC4    |
| TSPAN15  |
| TSPAN31  |
| USP22    |
| VCAN     |
| WDSOF1   |
| ZBTB38   |
