# Supplementary material for: Blood transcriptomics of drug-naïve sporadic Parkinson’s disease patients
Source: PubMed Central journal article supplement (PMC4625854; doi:10.1186/s12864-015-2058-3), 2015-10-28
Supplement: 12864_2015_2058_MOESM11_ESM.pdf [file 12864_2015_2058_MOESM11_ESM.pdf]

**Additional file 11. Statistically significant gene sets resulting from GSEA analyses.** GSEA was run on the normalized, unfiltered microarray dataset as suggested in the tools implementation (<http://www.broadinstitute.org/gsea> version 2.06), and using the c5 - GO gene sets collection of the Molecular Signatures Database (MSigDB) (<http://www.broadinstitute.org/gsea/msigdb/>). The test was performed separately on each of the c5 sub-collections (biological process, molecular function and cellular component), running 1000 permutations and excluding gene sets with fewer than 5 genes or more than 150 (the latter, to retain granularity). Name (Gene Symbol) shown in bold indicate transcripts measured by RT-qPCR (Additional file 12).

GSEA: Gene Ontology: Process (results ID 1280852587546)

CHROMATIN\_REMODELING

CHROMATIN\_ASSEMBLY\_OR\_DISASSEMBLY

GSEA: Gene Ontology: Function (results ID 1280908995046)

S\_ADENOSYLMETHIONINE\_DEPENDENT\_METHYLTRANSFERASE\_ACTIVITY

CYTOCHROME\_C\_OXIDASE\_ACTIVITY

TRANSFERASE\_ACTIVITY\_\_TRANSFERRING\_ONE\_CARBON\_GROUPS

PROTEIN\_METHYLTRANSFERASE\_ACTIVITY

METHYLTRANSFERASE\_ACTIVITY

GSEA: Gene Ontology: Component (results ID 1280909452203)

INTRINSIC\_TO\_GOLGI\_MEMBRANE

Genes that contribute to significance of gene sets above (in order of relevance):

**CHROMATIN\_REMODELING:**

**HELLS**

SUV39H2

RSF1

ACTL6A

BNIP3

SIRT4

HMGA1

**CHROMATIN\_ASSEMBLY\_OR\_DISASSEMBLY:**

**HELLS**

SUV39H2

NAP1L3

RSF1

SIRT4

HMGA1

MTA2

CHAF1A

NAP1L4

**ASF1A**

**S\_ADENOSYLMETHIONINE\_DEPENDENT\_METHYLTRANSFERASE\_ACTIVITY:**

SUV39H2

METTL1  
SUV39H1  
BHMT  
**DNMT3A**  
DNMT1  
PEMT  
DNMT3B  
PRMT7

**CYTOCHROME C OXIDASE ACTIVITY:**

CYB5A  
COX11  
COX7B  
COX4I1  
COX10  
COX5B

**TRANSFERASE ACTIVITY TRANSFERRING ONE CARBON GROUPS:**

SUV39H2  
GATM  
METTL1  
SUV39H1  
BHMT  
**DNMT3A**  
DNMT1  
GAMT  
**PRMT1**  
PEMT  
DNMT3B  
PRMT7  
MGMT

**PROTEIN METHYLTRANSFERASE ACTIVITY:**

SUV39H2  
SUV39H1  
PRMT7

**METHYLTRANSFERASE ACTIVITY:**

SUV39H2  
METTL1  
SUV39H1  
BHMT  
**DNMT3A**  
DNMT1  
GAMT  
**PRMT1**  
PEMT  
DNMT3B  
PRMT7  
MGMT

**INTRINSIC TO GOLGI MEMBRANE:**

LARGE

MAN1C1

BNIP3

RHOT2
