# Supplementary material for: Blood transcriptomics of drug-naïve sporadic Parkinson’s disease patients
Source: PubMed Central journal article supplement (PMC4625854; doi:10.1186/s12864-015-2058-3), 2015-10-28
Supplement: 12864_2015_2058_MOESM12_ESM.pdf [file 12864_2015_2058_MOESM12_ESM.pdf]

**Additional file 12. Genes involved in chromatin remodeling and methylation are targeted in PD.** Selected samples (12 PD and 12 HC blood samples) previously processed for gene expression profiling were also tested in RT-qPCR assays for several targets (CBX5, HELLS, MECP2, ASF1A, DNMT3A and PRMT1) that were identified by data analyses. Retrotranscription was performed using 1µg of RNA and the iSCRIPT™ cDNA Synthesis Kit (Bio-Rad) according to the manufacturer's protocol. Real Time qPCR was executed using SYBER-Green PCR Master Mix (Applied Biosystem) and an iCycler IQ Real Time PCR System (Bio-Rad). Sequences of gene specific primers are reported in the table below. Expression of the gene of interest was normalized to *β-actin*. The relative expression of each sample was calculated by the formula  $2^{-\Delta\Delta C_t}$  (User Bulletin 2 of the ABI Prism 7700 Sequence Detection System). The amplified products were separated on a 2% agarose gel and visualized with ethidium bromide staining.

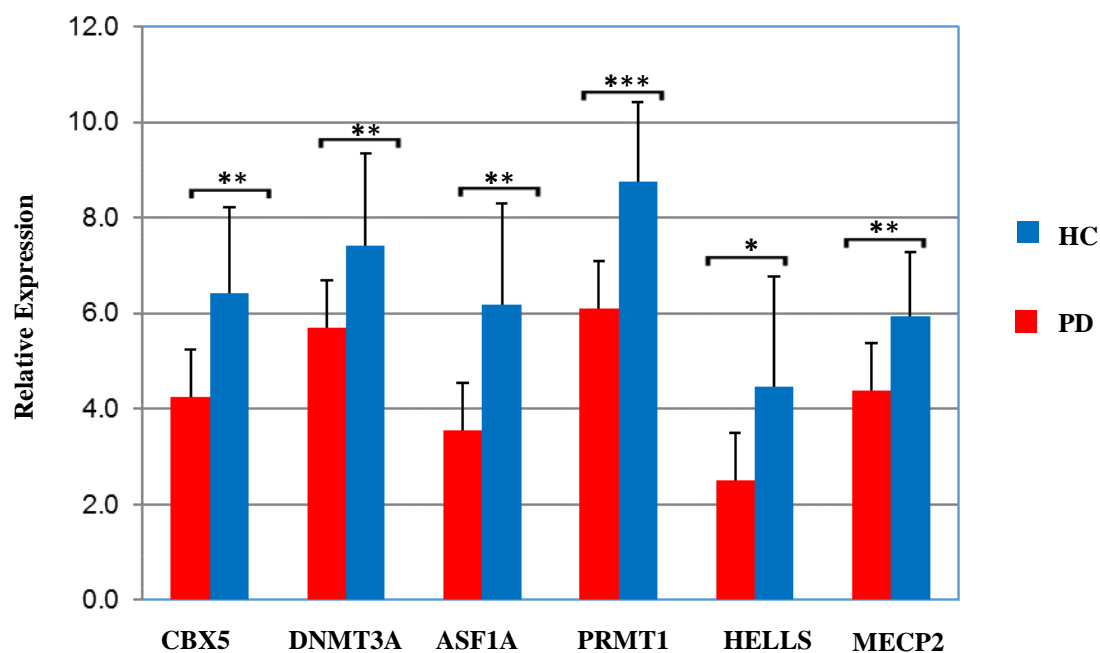

| Gene symbol | Forward_Primer           | Reverse_Primer            |
|-------------|--------------------------|---------------------------|
| CBX5        | CCAATTTCTCAAACAGTGCCGATG | GGTTCAGTCCTCTCTCAAAGC     |
| HELLS       | GCAAGTGAAGAGAAGCCAGTTATG | CACACAGAGATTAGTAGAGGAGGAG |
| ASF1A       | TCTCCTTTCTACAACCCGTTCC   | CTTGATCGTATTCTTCACTTTCTGC |
| DNMT3A      | GCTGCGGCGGCGAGAG         | TGTAGCGGTCCACCTGAATGC     |
| PRMT1       | GCCTCCAGCCGCCTCTTG       | ACCTCGTCCTTCAGCATCTCC     |
| MECP2       | CACGGAAGCTTAAGCAAAGG     | CTGGAGCTTTGGGAGATTTG      |
