# Supplementary material for: Blood transcriptomics of drug-naïve sporadic Parkinson’s disease patients
Source: PubMed Central journal article supplement (PMC4625854; doi:10.1186/s12864-015-2058-3), 2015-10-28
Supplement: 12864_2015_2058_MOESM14_ESM.pdf [file 12864_2015_2058_MOESM14_ESM.pdf]

**Additional file 14. List of similar- and anti-similar-to-PD compounds from drug network analysis.** Community identifiers, drugs and community enrichment P-values resulting from the drug network analysis of genome-wide ranked lists of genes sorted according to their differential expression in PD. Drugs are sorted according to their similarity to PD **(a)** and according to their “anti-similarity” **(b)** as explained in the main manuscript.

**(a)**

| Community | Drug                        | Enrichment P-value |
|-----------|-----------------------------|--------------------|
| 63        | helveticoside               | 8.99E-01           |
| 100       | metixene                    | 1.21E+01           |
| 100       | chlorprothixene             | 1.03E+00           |
| 63        | lanatoside_C                | 4.09E-02           |
| 100       | alexidine                   | 1.85E-01           |
| 63        | proscillaridin              | 9.34E-04           |
| 100       | levomepromazine             | 3.45E-02           |
| 63        | digoxin                     | 2.00E-05           |
| 62        | niclosamide                 | 2.02E+01           |
| 28        | geldanamycin                | 4.03E+00           |
| 106       | zardaverine                 | 7.85E+00           |
| 100       | methylbenzethonium_chloride | 3.56E-02           |
| 63        | ouabain                     | 1.94E-06           |
| 100       | perphenazine                | 6.98E-03           |
| 102       | terguride                   | 1.81E+01           |
| 104       | etacrynic_acid              | 2.03E+01           |
| 63        | lycorine                    | 8.54E-08           |
| 100       | trifluoperazine             | 3.44E-03           |
| 100       | piperacetazine              | 4.32E-04           |
| 100       | cytochalasin_B              | 5.02E-05           |
| 62        | felodipine                  | 8.72E+00           |
| 100       | chlorcyclizine              | 9.51E-06           |
| 34        | terfenadine                 | 2.94E+01           |
| 62        | 0179445-0000                | 1.70E+00           |
| 81        | serotonin                   | 9.85E+00           |
| 104       | 15-delta_prostaglandin_J2   | 4.60E+00           |
| 63        | digoxigenin                 | 2.31E-08           |
| 16        | pergolide                   | 3.14E+01           |
| 100       | loperamide                  | 1.95E-05           |
| 60        | clomipramine                | 3.50E+01           |
| 100       | calmidazolium               | 3.83E-06           |
| 15        | Gly-His-Lys                 | 1.01E+01           |
| 40        | mometasone                  | 6.37E+01           |
| 13        | clonidine                   | 5.19E+01           |
| 40        | puromycin                   | 2.57E+01           |
| 40        | betazole                    | 7.32E+00           |
| 64        | pentetrazol                 | 1.43E+01           |
| 100       | desipramine                 | 5.53E-06           |
| 100       | 0297417-0002B               | 7.57E-07           |
| 69        | fenbendazole                | 2.86E+01           |
| 89        | sanguinarine                | 7.01E+01           |
| 7         | diazoxide                   | 6.00E+01           |
| 60        | 1,5-isoquinolinediol        | 1.12E+01           |
| 34        | nordihydroguaiaretic_acid   | 1.29E+01           |

|     |                          |          |
|-----|--------------------------|----------|
| 40  | loxapine                 | 3.13E+00 |
| 62  | gossypol                 | 2.00E+00 |
| 32  | cefalotin                | 8.18E+01 |
| 102 | altretamine              | 1.22E+01 |
| 38  | glycopyrronium_bromide   | 2.19E+01 |
| 22  | phenelzine               | 4.01E+01 |
| 63  | strophanthidin           | 4.91E-08 |
| 104 | securinine               | 2.90E+00 |
| 100 | protriptyline            | 8.37E-06 |
| 100 | chlorpromazine           | 1.36E-06 |
| 89  | N-acetyl-L-leucine       | 4.36E+01 |
| 104 | withaferin_A             | 5.05E-01 |
| 104 | thiostrepton             | 5.82E-02 |
| 34  | prenylamine              | 4.49E+00 |
| 102 | biotin                   | 3.43E+00 |
| 6   | hydroxyzine              | 6.34E+01 |
| 62  | clofazimine              | 1.15E+00 |
| 89  | menadione                | 2.17E+01 |
| 40  | disulfiram               | 2.50E+00 |
| 16  | trimethobenzamide        | 1.95E+01 |
| 100 | fluphenazine             | 3.63E-06 |
| 100 | prochlorperazine         | 6.24E-07 |
| 69  | mebendazole              | 9.53E+00 |
| 34  | suloctidil               | 1.26E+00 |
| 40  | celastrol                | 8.88E-01 |
| 40  | 5224221                  | 2.00E-01 |
| 100 | quinisocaine             | 3.06E-07 |
| 63  | digitoxigenin            | 1.51E-08 |
| 52  | carbachol                | 8.82E+01 |
| 100 | diperodon                | 8.70E-08 |
| 104 | parthenolide             | 2.32E-02 |
| 100 | benzethonium_chloride    | 1.85E-08 |
| 40  | fendiline                | 6.87E-02 |
| 40  | 1,4-chrysenequinone      | 1.27E-02 |
| 4   | syrosingopine            | 7.65E+01 |
| 62  | pyrvinium                | 8.40E-01 |
| 62  | benzamil                 | 1.83E-01 |
| 7   | bupirone                 | 5.05E+01 |
| 32  | Prestwick-664            | 7.72E+01 |
| 32  | 0175029-0000             | 4.95E+01 |
| 69  | scoulerine               | 2.43E+00 |
| 41  | etofylline               | 4.91E+01 |
| 100 | podophyllotoxin          | 4.18E-08 |
| 100 | cloperastine             | 7.00E-09 |
| 40  | thapsigargin             | 6.11E-03 |
| 5   | azathioprine             | 8.79E+01 |
| 104 | C-75                     | 7.33E-03 |
| 62  | pararosaniline           | 7.60E-02 |
| 5   | isocarboxazid            | 5.55E+01 |
| 55  | suxibuzone               | 3.33E+01 |
| 23  | NS-398                   | 2.79E+01 |
| 100 | bepidil                  | 6.76E-09 |
| 34  | mefloquine               | 8.51E-01 |
| 5   | N-acetyl-L-aspartic_acid | 2.84E+01 |

|     |                             |          |
|-----|-----------------------------|----------|
| 89  | ketoprofen                  | 2.52E+01 |
| 14  | bromopride                  | 7.47E+01 |
| 0   | metoclopramide              | 1.07E+02 |
| 40  | prilocaine                  | 3.47E-03 |
| 90  | beta-escin                  | 1.07E+02 |
| 100 | homochlorcyclizine          | 6.13E-09 |
| 34  | astemizole                  | 2.07E-01 |
| 16  | spironolactone              | 1.43E+01 |
| 100 | clemastine                  | 1.68E-09 |
| 13  | atropine                    | 6.69E+01 |
| 40  | MG-132                      | 1.07E-03 |
| 102 | phenylpropanolamine         | 4.17E+00 |
| 67  | letrozole                   | 6.30E+01 |
| 102 | flucytosine                 | 9.11E-01 |
| 92  | terconazole                 | 5.51E+01 |
| 60  | josamycin                   | 1.92E+01 |
| 52  | bephenium_hydroxynaphthoate | 8.10E+01 |
| 32  | Prestwick-665               | 4.92E+01 |
| 0   | nefopam                     | 1.06E+02 |
| 53  | anisomycin                  | 4.64E+01 |
| 62  | dequalinium_chloride        | 9.31E-02 |
| 73  | bromocriptine               | 6.21E+01 |
| 62  | profenamine                 | 2.05E-02 |
| 73  | (-)-isoprenaline            | 2.16E+01 |
| 60  | tolfenamic_acid             | 7.22E+00 |
| 40  | piperlongumine              | 6.95E-04 |
| 73  | orciprenaline               | 4.98E+00 |
| 100 | dihydroergocristine         | 1.50E-08 |
| 28  | alvespimycin                | 8.22E+00 |
| 89  | terbutaline                 | 2.30E+01 |
| 0   | nicardipine                 | 1.06E+02 |
| 106 | dinoprost                   | 2.38E+01 |
| 100 | imipramine                  | 6.30E-09 |
| 26  | lisuride                    | 5.05E+01 |
| 85  | delsoline                   | 7.05E+01 |
| 62  | abamectin                   | 9.21E-03 |
| 42  | dirithromycin               | 8.63E+01 |
| 7   | droperidol                  | 5.25E+01 |
| 40  | (+)-chelidonine             | 3.59E-04 |
| 63  | hydroquinine                | 1.35E-07 |
| 62  | 5707885                     | 2.23E-03 |
| 52  | levamisole                  | 6.84E+01 |
| 7   | oxaprozin                   | 2.99E+01 |
| 42  | glibenclamide               | 5.31E+01 |
| 28  | monorden                    | 1.16E+00 |
| 52  | bendroflumethiazide         | 4.54E+01 |
| 100 | metitepine                  | 1.46E-08 |
| 62  | valinomycin                 | 5.90E-04 |
| 42  | chlorzoxazone               | 2.49E+01 |
| 53  | propofol                    | 1.50E+01 |
| 25  | epirizole                   | 7.52E+01 |
| 86  | adipiodone                  | 4.13E+01 |
| 0   | terazosin                   | 1.05E+02 |
| 5   | ciprofloxacin               | 3.22E+01 |

|     |                          |          |
|-----|--------------------------|----------|
| 73  | fenoterol                | 1.51E+00 |
| 20  | mexiletine               | 5.66E+01 |
| 16  | diprophylline            | 1.18E+01 |
| 100 | nortriptyline            | 1.75E-08 |
| 60  | wortmannin               | 4.64E+00 |
| 101 | salbutamol               | 5.76E+01 |
| 49  | exemestane               | 8.45E+01 |
| 42  | lobeline                 | 1.07E+01 |
| 100 | fluspirilene             | 7.14E-09 |
| 38  | calcium_folate           | 1.75E+01 |
| 28  | tanespimycin             | 1.12E-01 |
| 97  | furazolidone             | 7.51E+01 |
| 0   | thiamazole               | 1.04E+02 |
| 100 | BW-B70C                  | 2.87E-09 |
| 16  | HC_toxin                 | 4.59E+00 |
| 88  | clenbuterol              | 6.01E+01 |
| 100 | albendazole              | 7.95E-10 |
| 40  | pimethixene              | 9.25E-04 |
| 46  | isoetarine               | 6.69E+01 |
| 5   | cefazolin                | 2.12E+01 |
| 13  | hydrastine_hydrochloride | 7.09E+01 |
| 3   | triamterene              | 1.00E+02 |
| 84  | cefmetazole              | 5.49E+01 |
| 100 | maprotiline              | 4.43E-10 |
| 100 | phenazopyridine          | 8.22E-11 |
| 34  | trimipramine             | 6.97E-01 |
| 13  | flufenamic_acid          | 4.85E+01 |
| 76  | nomifensine              | 5.60E+01 |
| 100 | raloxifene               | 2.57E-11 |
| 7   | triprolidine             | 2.79E+01 |
| 100 | thiopropazine            | 5.38E-12 |
| 41  | allantoin                | 3.94E+01 |
| 100 | hexetidine               | 1.09E-12 |
| 74  | ketorolac                | 9.46E+01 |
| 5   | haloperidol              | 1.23E+01 |
| 92  | beclometasone            | 3.45E+01 |
| 103 | methoxsalen              | 4.00E+01 |
| 12  | oxolamine                | 7.14E+01 |
| 6   | corticosterone           | 8.45E+01 |
| 13  | DL-thiorphan             | 3.21E+01 |
| 104 | STOCK1N-35215            | 1.53E-01 |
| 6   | tacrine                  | 5.90E+01 |
| 13  | labetalol                | 1.67E+01 |
| 0   | pirindole                | 1.05E+02 |
| 6   | diphemanil_metilsulfate  | 3.40E+01 |
| 51  | butein                   | 4.16E+01 |
| 59  | halcinonide              | 8.29E+01 |
| 92  | tetramisole              | 1.17E+01 |
| 0   | cyclopentolate           | 1.03E+02 |
| 100 | amphotericin_B           | 3.73E-12 |
| 32  | proxymetacaine           | 8.00E+01 |
| 16  | scriptaid                | 2.91E+00 |
| 51  | HNMPA-(AM)3              | 7.03E+00 |
| 100 | clozapine                | 1.09E-12 |

|     |                         |          |
|-----|-------------------------|----------|
| 46  | corbadrine              | 3.28E+01 |
| 85  | ursodeoxycholic_acid    | 5.23E+01 |
| 62  | clioquinol              | 6.64E-03 |
| 89  | cantharidin             | 4.71E+01 |
| 4   | 5114445                 | 9.18E+01 |
| 104 | F0447-0125              | 5.16E-02 |
| 64  | pyrantel                | 2.02E+01 |
| 69  | colchicine              | 6.95E+00 |
| 13  | alpha-yohimbine         | 1.08E+01 |
| 97  | tetroquinone            | 4.84E+01 |
| 3   | quercetin               | 9.09E+01 |
| 7   | 5162773                 | 2.42E+01 |
| 52  | progesterone            | 6.22E+01 |
| 40  | MG-262                  | 5.20E-03 |
| 7   | BAS-012416453           | 1.21E+01 |
| 90  | sertaconazole           | 1.07E+02 |
| 61  | cyclizine               | 1.05E+02 |
| 100 | doxepin                 | 3.75E-12 |
| 3   | ciclopirox              | 7.06E+01 |
| 90  | colecalfiferol          | 1.07E+02 |
| 89  | 6-benzylaminopurine     | 3.67E+01 |
| 71  | tropine                 | 7.91E+01 |
| 38  | atractyloside           | 7.50E+00 |
| 7   | amrinone                | 6.08E+00 |
| 1   | tamoxifen               | 7.37E+01 |
| 16  | LY-294002               | 1.45E+00 |
| 5   | quinidine               | 1.26E+01 |
| 37  | bumetanide              | 9.70E+01 |
| 71  | Prestwick-1085          | 3.92E+01 |
| 100 | amoxapine               | 4.16E-12 |
| 52  | cinchocaine             | 5.00E+01 |
| 100 | tetrandrine             | 8.53E-13 |
| 32  | lysergol                | 7.97E+01 |
| 6   | naltrexone              | 2.77E+01 |
| 102 | rolipram                | 6.09E+00 |
| 100 | tonzonium_bromide       | 2.37E-13 |
| 71  | methanthelinium_bromide | 1.32E+01 |
| 34  | spiperone               | 1.09E+00 |
| 100 | thioridazine            | 5.41E-14 |
| 50  | flecainide              | 8.22E+01 |
| 102 | hydrocortisone          | 2.03E+00 |
| 59  | mepenzolate_bromide     | 5.69E+01 |
| 102 | nicotinic_acid          | 5.16E-01 |
| 51  | dimethyloxalylglycine   | 7.38E-01 |
| 5   | cinchonidine            | 7.59E+00 |
| 90  | parbendazole            | 1.07E+02 |
| 37  | enalapril               | 7.56E+01 |
| 5   | bisoprolol              | 3.10E+00 |
| 62  | rottlerin               | 1.49E-02 |
| 89  | talampicillin           | 3.31E+01 |
| 100 | cyclobenzaprine         | 5.65E-14 |
| 13  | papaverine              | 1.07E+01 |
| 37  | dimenhydrinate          | 4.65E+01 |
| 100 | alimemazine             | 1.24E-14 |

|     |                       |          |
|-----|-----------------------|----------|
| 60  | gefitinib             | 1.10E+01 |
| 100 | amitriptyline         | 2.20E-15 |
| 40  | PF-00875133-00        | 1.27E-02 |
| 0   | SC-560                | 1.06E+02 |
| 100 | perhexiline           | 4.50E-16 |
| 104 | 5155877               | 5.50E-02 |
| 100 | CP-645525-01          | 7.37E-17 |
| 42  | clindamycin           | 1.88E+01 |
| 61  | oxymetazoline         | 1.01E+02 |
| 32  | tinidazole            | 7.75E+01 |
| 97  | (+/-)-catechin        | 3.00E+01 |
| 61  | propafenone           | 8.76E+01 |
| 40  | mianserin             | 5.07E-03 |
| 60  | nimesulide            | 4.92E+00 |
| 29  | cinchonine            | 1.06E+02 |
| 102 | naftidrofuryl         | 2.19E-01 |
| 12  | SR-95639A             | 4.87E+01 |
| 105 | gelsemine             | 7.46E+01 |
| 16  | rifabutin             | 1.07E+00 |
| 105 | diflorasone           | 3.12E+01 |
| 100 | zuclopenthixol        | 1.01E-16 |
| 100 | clofilium_tosylate    | 1.33E-17 |
| 40  | dicycloverine         | 1.93E-03 |
| 100 | orphenadrine          | 1.98E-18 |
| 4   | berberine             | 9.04E+01 |
| 0   | piretanide            | 1.06E+02 |
| 74  | morantel              | 9.07E+01 |
| 5   | streptomycin          | 2.47E+00 |
| 104 | myricetin             | 1.87E-02 |
| 89  | flumequine            | 3.18E+01 |
| 100 | clomifene             | 7.11E-19 |
| 5   | oxantel               | 9.06E-01 |
| 40  | 5253409               | 7.02E-04 |
| 61  | nisoxetine            | 7.39E+01 |
| 90  | tyloxapol             | 1.07E+02 |
| 16  | mepacrine             | 3.69E-01 |
| 59  | pempidine             | 3.58E+01 |
| 4   | ikarugamycin          | 7.51E+01 |
| 42  | ajmaline              | 1.11E+01 |
| 102 | fluvastatin           | 7.86E-02 |
| 22  | Prestwick-1100        | 8.58E+01 |
| 5   | betamethasone         | 3.52E-01 |
| 61  | Trolox_C              | 5.44E+01 |
| 95  | tiaprofenic_acid      | 9.95E+01 |
| 7   | 5213008               | 1.11E+01 |
| 37  | chenodeoxycholic_acid | 3.22E+01 |
| 104 | oxyphenbutazone       | 4.79E-03 |
| 32  | amoxicillin           | 7.84E+01 |
| 13  | gramine               | 1.19E+01 |
| 98  | tretinoin             | 7.08E+01 |
| 58  | meprylcaine           | 1.06E+02 |
| 15  | STOCK1N-35874         | 2.59E+01 |
| 20  | proglumide            | 4.71E+01 |
| 67  | gibberellic_acid      | 7.85E+01 |

|     |                          |          |
|-----|--------------------------|----------|
| 53  | cicloheximide            | 1.65E+01 |
| 90  | bretylum_tosilate        | 1.07E+02 |
| 61  | fipexide                 | 3.75E+01 |
| 4   | decitabine               | 5.96E+01 |
| 89  | pargyline                | 2.86E+01 |
| 31  | corynanthine             | 1.06E+02 |
| 0   | cefoperazone             | 1.07E+02 |
| 87  | risperidone              | 9.23E+01 |
| 42  | clopamide                | 5.57E+00 |
| 52  | Prestwick-860            | 6.87E+01 |
| 61  | mesoridazine             | 2.22E+01 |
| 50  | benfotiamine             | 5.92E+01 |
| 61  | triflusal                | 1.07E+01 |
| 62  | clotrimazole             | 7.81E-02 |
| 54  | esculetin                | 8.19E+01 |
| 62  | miconazole               | 2.16E-02 |
| 72  | 3-acetamidocoumarin      | 1.03E+02 |
| 83  | clidinium_bromide        | 9.33E+01 |
| 3   | etoposide                | 8.05E+01 |
| 62  | naftifine                | 5.81E-03 |
| 5   | AG-028671                | 2.57E-01 |
| 52  | ioversol                 | 5.57E+01 |
| 64  | aztreonam                | 1.19E+01 |
| 82  | scopolamine_N-oxide      | 1.02E+02 |
| 13  | tremorine                | 9.13E+00 |
| 50  | spiramycin               | 2.82E+01 |
| 26  | guanabenz                | 5.25E+01 |
| 11  | CP-690334-01             | 9.42E+01 |
| 67  | mephentermine            | 5.46E+01 |
| 89  | sitosterol               | 2.44E+01 |
| 40  | lynestrenol              | 2.31E-03 |
| 100 | metergoline              | 7.28E-16 |
| 34  | aminophenazone           | 2.91E+00 |
| 49  | 4,5-dianilinophthalimide | 9.31E+01 |
| 62  | foliosidine              | 2.34E-03 |
| 90  | etanidazole              | 1.07E+02 |
| 30  | amiprilose               | 7.64E+01 |
| 91  | sulindac                 | 8.47E+01 |
| 66  | isosorbide               | 7.66E+01 |
| 16  | bufexamac                | 3.16E-01 |
| 0   | benzbromarone            | 1.07E+02 |
| 100 | ivermectin               | 3.86E-16 |
| 52  | palmatine                | 4.66E+01 |
| 100 | co-dergocrine_mesilate   | 5.86E-17 |
| 102 | florfenicol              | 6.77E-02 |
| 22  | quinethazone             | 7.32E+01 |
| 74  | meticrane                | 8.43E+01 |
| 90  | dexpropranolol           | 1.07E+02 |
| 0   | lidocaine                | 1.07E+02 |
| 18  | valdecoxib               | 6.68E+01 |
| 97  | paromomycin              | 2.39E+01 |
| 1   | fasudil                  | 5.73E+01 |
| 101 | kawain                   | 5.74E+01 |
| 58  | meclofenoxate            | 1.05E+02 |

|     |                                  |          |
|-----|----------------------------------|----------|
| 11  | alpha-ergocryptine               | 6.76E+01 |
| 84  | leflunomide                      | 4.66E+01 |
| 40  | dyclonine                        | 1.81E-03 |
| 46  | zomepirac                        | 3.39E+01 |
| 42  | danazol                          | 3.91E+00 |
| 68  | carbarsone                       | 1.03E+02 |
| 13  | diclofenac                       | 7.67E+00 |
| 99  | trimethylcolchicinic_acid        | 1.06E+02 |
| 0   | ampicillin                       | 1.07E+02 |
| 66  | karakoline                       | 3.51E+01 |
| 24  | splitomicin                      | 6.87E+01 |
| 62  | mifepristone                     | 1.84E-03 |
| 58  | phenformin                       | 9.97E+01 |
| 4   | 5286656                          | 5.91E+01 |
| 74  | imipenem                         | 6.66E+01 |
| 85  | milrinone                        | 6.42E+01 |
| 5   | bergenin                         | 2.91E-01 |
| 99  | trichlormethiazide               | 1.02E+02 |
| 35  | gliquidone                       | 1.02E+02 |
| 11  | citalopram                       | 3.69E+01 |
| 52  | meropenem                        | 4.25E+01 |
| 14  | gallamine_triethiodide           | 1.03E+02 |
| 24  | docosahexaenoic_acid_ethyl_ester | 2.29E+01 |
| 95  | moxonidine                       | 9.10E+01 |
| 103 | dicloxacillin                    | 2.31E+01 |
| 38  | guanadrel                        | 7.58E+00 |
| 89  | R-atenolol                       | 2.91E+01 |
| 58  | Prestwick-685                    | 9.02E+01 |
| 90  | liothyronine                     | 1.07E+02 |
| 85  | benzylpenicillin                 | 3.86E+01 |
| 71  | chloropyrazine                   | 1.41E+01 |
| 27  | isoflupredone                    | 1.07E+02 |
| 85  | sulfadoxine                      | 1.72E+01 |
| 3   | blebbistatin                     | 7.94E+01 |
| 57  | eticlopride                      | 9.01E+01 |
| 50  | ethoxyquin                       | 1.46E+01 |
| 6   | calycanthine                     | 6.02E+01 |
| 0   | diloxanide                       | 1.07E+02 |
| 61  | gliclazide                       | 1.44E+01 |
| 52  | ethaverine                       | 3.39E+01 |
| 40  | cyproheptadine                   | 2.37E-03 |
| 42  | chlorhexidine                    | 2.12E+00 |
| 0   | naphazoline                      | 1.06E+02 |
| 101 | clemizole                        | 3.03E+01 |
| 95  | trimethadione                    | 7.04E+01 |
| 63  | bisacodyl                        | 3.09E-04 |
| 48  | paclitaxel                       | 1.04E+02 |
| 0   | alclometasone                    | 1.06E+02 |
| 61  | thiocolchicoside                 | 7.32E+00 |
| 32  | flunixin                         | 9.84E+01 |
| 32  | luteolin                         | 9.11E+01 |
| 92  | iocetamic_acid                   | 2.49E+01 |
| 5   | convolamine                      | 2.12E-01 |
| 39  | drofenine                        | 9.18E+01 |



|     |                       |          |
|-----|-----------------------|----------|
| 102 | (-)-atenolol          | 5.71E-02 |
| 100 | ursolic_acid          | 6.99E-14 |
| 46  | ebesen                | 1.71E+01 |
| 90  | acepromazine          | 1.07E+02 |
| 90  | nitrofurantoin        | 1.07E+02 |
| 22  | nialamide             | 6.30E+01 |
| 5   | noretynodrel          | 6.66E-02 |
| 4   | artemisinin           | 5.38E+01 |
| 85  | oxprenolol            | 7.67E+00 |
| 0   | mimosine              | 1.06E+02 |
| 13  | methacholine_chloride | 9.12E+00 |
| 3   | resveratrol           | 6.88E+01 |
| 66  | betonicine            | 1.18E+01 |
| 49  | rofecoxib             | 8.77E+01 |
| 7   | Prestwick-1082        | 3.26E+01 |
| 58  | 3-acetylcoumarin      | 8.28E+01 |
| 8   | pronetalol            | 1.06E+02 |
| 100 | thiethylperazine      | 6.86E-14 |
| 89  | hydrocotarnine        | 3.19E+01 |
| 13  | sulfadiazine          | 4.75E+00 |
| 21  | mephenesin            | 9.81E+01 |
| 62  | erastin               | 5.22E-03 |
| 1   | sodium_phenylbutyrate | 3.56E+01 |
| 75  | ribavirin             | 8.68E+01 |
| 5   | 5140203               | 2.53E-02 |
| 19  | orlistat              | 1.07E+02 |
| 59  | eldeline              | 4.00E+01 |
| 92  | ethionamide           | 1.05E+01 |
| 1   | 2-deoxy-D-glucose     | 1.19E+01 |
| 34  | dihydroergotamine     | 5.72E+00 |
| 0   | baclofen              | 1.06E+02 |
| 25  | benzonatate           | 9.75E+01 |
| 2   | bucladesine           | 8.77E+01 |
| 74  | fenspiride            | 6.13E+01 |
| 59  | flunisolide           | 1.81E+01 |
| 13  | protoveratrine_A      | 2.60E+00 |
| 88  | ritodrine             | 7.30E+01 |
| 7   | 5151277               | 2.48E+01 |
| 13  | ifosfamide            | 9.97E-01 |
| 0   | sulfasalazine         | 1.05E+02 |
| 59  | solasodine            | 5.96E+00 |
| 0   | chloropyramine        | 1.04E+02 |
| 36  | gabexate              | 9.94E+01 |
| 71  | ondansetron           | 6.33E+00 |
| 67  | Prestwick-967         | 5.40E+01 |
| 7   | cefapirin             | 1.50E+01 |
| 104 | carmustine            | 7.57E-02 |
| 4   | pinacidil             | 4.63E+01 |
| 3   | 5109870               | 5.94E+01 |
| 97  | iodixanol             | 2.03E+01 |
| 7   | cefotetan             | 7.98E+00 |
| 41  | roxarsone             | 7.39E+01 |
| 90  | pentamidine           | 1.07E+02 |
| 34  | penbutolol            | 2.96E+00 |

|     |                       |          |
|-----|-----------------------|----------|
| 3   | guaifenesin           | 4.11E+01 |
| 7   | cinnarizine           | 3.79E+00 |
| 0   | N6-methyladenosine    | 1.04E+02 |
| 20  | indapamide            | 4.14E+01 |
| 6   | 5149715               | 6.24E+01 |
| 90  | sulconazole           | 1.07E+02 |
| 6   | metformin             | 4.28E+01 |
| 106 | molindone             | 7.57E+01 |
| 89  | oxytetracycline       | 3.39E+01 |
| 106 | meptazinol            | 4.76E+01 |
| 97  | amylocaine            | 7.56E+00 |
| 32  | paroxetine            | 9.79E+01 |
| 90  | Prestwick-674         | 1.07E+02 |
| 26  | aciclovir             | 4.31E+01 |
| 106 | alprostadil           | 2.31E+01 |
| 60  | famotidine            | 3.03E+01 |
| 52  | cefsulodin            | 4.96E+01 |
| 12  | meclocycline          | 5.67E+01 |
| 72  | decamethonium_bromide | 1.03E+02 |
| 34  | isoconazole           | 1.30E+00 |
| 62  | azacyclonol           | 8.05E-03 |
| 88  | ketoconazole          | 4.44E+01 |
| 6   | 5152487               | 2.90E+01 |
| 34  | rescinnamine          | 3.63E-01 |
| 92  | Prestwick-642         | 4.22E+00 |
| 62  | butoconazole          | 1.93E-03 |
| 3   | 5211181               | 3.01E+01 |
| 11  | dilazep               | 2.79E+01 |
| 92  | vitexin               | 7.06E-01 |
| 55  | napelline             | 6.85E+01 |
| 29  | vigabatrin            | 1.07E+02 |
| 3   | deferoxamine          | 1.68E+01 |
| 14  | MS-275                | 1.04E+02 |
| 19  | STOCK1N-35696         | 1.07E+02 |
| 104 | lomustine             | 3.30E-02 |
| 37  | dropropizine          | 5.74E+01 |
| 59  | alcuronium_chloride   | 2.33E+00 |
| 0   | brinzolamide          | 1.05E+02 |
| 80  | iproniazid            | 9.83E+01 |
| 99  | fosfosal              | 1.02E+02 |
| 34  | atropine_oxide        | 1.10E-01 |
| 7   | melatonin             | 3.19E+00 |
| 13  | testosterone          | 1.21E+00 |
| 100 | norcyclobenzaprine    | 8.36E-11 |
| 37  | telenzepine           | 3.52E+01 |
| 99  | simvastatin           | 9.36E+01 |
| 49  | troleandomycin        | 8.29E+01 |
| 90  | clorgiline            | 1.07E+02 |
| 89  | tolbutamide           | 3.44E+01 |
| 39  | isopropamide_iodide   | 7.13E+01 |
| 32  | acacetin              | 9.84E+01 |
| 62  | rotenone              | 9.36E-04 |
| 0   | Prestwick-857         | 1.05E+02 |
| 40  | propidium_iodide      | 6.69E-02 |

|     |                                 |          |
|-----|---------------------------------|----------|
| 32  | 2,6-dimethylpiperidine          | 9.25E+01 |
| 89  | picrotoxinin                    | 2.41E+01 |
| 82  | remoxipride                     | 1.03E+02 |
| 58  | sulfamethoxypyridazine          | 8.69E+01 |
| 58  | aminohippuric_acid              | 7.01E+01 |
| 90  | sulfamerazine                   | 1.07E+02 |
| 6   | tetrahydroalstonine             | 2.25E+01 |
| 41  | octopamine                      | 5.83E+01 |
| 77  | nitrendipine                    | 9.42E+01 |
| 66  | pramocaine                      | 3.08E+00 |
| 32  | etidronic_acid                  | 8.62E+01 |
| 27  | tolnaftate                      | 1.07E+02 |
| 35  | metrizamide                     | 1.01E+02 |
| 103 | velnacrine                      | 7.66E+00 |
| 84  | nadide                          | 3.70E+01 |
| 74  | acetohexamide                   | 6.07E+01 |
| 62  | ticlopidine                     | 3.10E-04 |
| 78  | oligomycin                      | 8.60E+01 |
| 5   | minocycline                     | 1.03E-01 |
| 100 | monensin                        | 2.74E-10 |
| 100 | raubasine                       | 4.74E-11 |
| 92  | bicuculline                     | 1.04E-01 |
| 67  | cefalonium                      | 4.54E+01 |
| 42  | Prestwick-689                   | 5.30E+00 |
| 100 | proguanil                       | 1.03E-11 |
| 102 | flurbiprofen                    | 1.85E-01 |
| 22  | santonin                        | 6.77E+01 |
| 54  | halofantrine                    | 7.57E+01 |
| 32  | tiabendazole                    | 8.12E+01 |
| 7   | ricinine                        | 2.72E+00 |
| 82  | nabumetone                      | 9.37E+01 |
| 106 | Prestwick-983                   | 1.44E+01 |
| 19  | mebeverine                      | 1.07E+02 |
| 41  | torasemide                      | 3.57E+01 |
| 90  | riboflavin                      | 1.07E+02 |
| 74  | naproxen                        | 4.28E+01 |
| 34  | dosulepin                       | 6.04E-02 |
| 32  | heliotrine                      | 7.25E+01 |
| 87  | moracizine                      | 9.45E+01 |
| 13  | scopolamine                     | 1.20E+00 |
| 32  | thioguanosine                   | 6.03E+01 |
| 74  | nipecotic_acid                  | 2.42E+01 |
| 90  | cycloserine                     | 1.07E+02 |
| 90  | cyproterone                     | 1.07E+02 |
| 57  | vancomycin                      | 7.79E+01 |
| 10  | 15(S)-15-methylprostaglandin_E2 | 9.65E+01 |
| 19  | glafenine                       | 1.07E+02 |
| 32  | trioxysalen                     | 4.94E+01 |
| 81  | epiandrosterone                 | 7.84E+01 |
| 7   | tiratricol                      | 1.48E+00 |
| 64  | oxolinic_acid                   | 1.33E+01 |
| 43  | estrone                         | 1.06E+02 |
| 52  | esculin                         | 6.67E+01 |
| 49  | verapamil                       | 7.35E+01 |

|     |                  |          |
|-----|------------------|----------|
| 60  | amodiaquine      | 3.50E+01 |
| 62  | LM-1685          | 2.04E-04 |
| 69  | oxedrine         | 5.26E+01 |
| 61  | picotamide       | 2.63E+01 |
| 50  | dicoumarol       | 1.63E+01 |
| 7   | benzylamine      | 5.95E-01 |
| 90  | medrysone        | 1.07E+02 |
| 21  | 0173570-0000     | 8.99E+01 |
| 84  | ramifenazone     | 1.43E+01 |
| 87  | lansoprazole     | 7.40E+01 |
| 3   | colforsin        | 2.07E+01 |
| 27  | Prestwick-692    | 1.07E+02 |
| 90  | latamoxef        | 1.07E+02 |
| 40  | dienestrol       | 1.74E-01 |
| 59  | citolone         | 1.08E+00 |
| 90  | apramycin        | 1.07E+02 |
| 12  | brompheniramine  | 4.40E+01 |
| 25  | acetazolamide    | 9.76E+01 |
| 19  | ornidazole       | 1.07E+02 |
| 0   | glimepiride      | 1.07E+02 |
| 37  | prednisolone     | 3.09E+01 |
| 52  | natamycin        | 5.94E+01 |
| 32  | metyrapone       | 4.76E+01 |
| 14  | mitoxantrone     | 1.04E+02 |
| 0   | nifenazone       | 1.07E+02 |
| 74  | hydralazine      | 1.54E+01 |
| 61  | iobenguane       | 1.76E+01 |
| 60  | SC-58125         | 2.39E+01 |
| 105 | conessine        | 4.71E+01 |
| 8   | ethambutol       | 1.06E+02 |
| 34  | proadifen        | 2.65E-02 |
| 6   | 5186223          | 2.52E+01 |
| 90  | capsaicin        | 1.07E+02 |
| 102 | urapidil         | 1.04E-01 |
| 94  | tioguanine       | 9.14E+01 |
| 14  | azacitidine      | 9.78E+01 |
| 25  | moxisylyte       | 8.39E+01 |
| 32  | skimmianine      | 4.02E+01 |
| 60  | chlorphenesin    | 1.28E+01 |
| 19  | erythromycin     | 1.07E+02 |
| 39  | carbinoxamine    | 4.90E+01 |
| 90  | adrenosterone    | 1.07E+02 |
| 61  | ceftazidime      | 1.00E+01 |
| 47  | sparteine        | 1.05E+02 |
| 40  | isotretinoin     | 1.37E-01 |
| 90  | alverine         | 1.07E+02 |
| 31  | cefotaxime       | 1.07E+02 |
| 32  | dextromethorphan | 3.14E+01 |
| 52  | pivampicillin    | 5.35E+01 |
| 87  | spaglumic_acid   | 4.98E+01 |
| 29  | furosemide       | 1.07E+02 |
| 54  | Prestwick-981    | 5.07E+01 |
| 88  | procainamide     | 3.41E+01 |
| 70  | vinblastine      | 9.96E+01 |

|     |                                |          |
|-----|--------------------------------|----------|
| 90  | sulfinpyrazone                 | 1.07E+02 |
| 16  | vorinostat                     | 9.45E+00 |
| 99  | colistin                       | 9.61E+01 |
| 0   | sulfanilamide                  | 1.07E+02 |
| 62  | mercaptopurine                 | 2.34E-04 |
| 90  | hexestrol                      | 1.07E+02 |
| 17  | thalidomide                    | 9.31E+01 |
| 89  | etamsylate                     | 5.03E+01 |
| 93  | flutamide                      | 1.05E+02 |
| 14  | GW-8510                        | 9.00E+01 |
| 13  | physostigmine                  | 2.00E+00 |
| 32  | vidarabine                     | 2.61E+01 |
| 6   | etodolac                       | 1.84E+01 |
| 12  | Chicago_Sky_Blue_6B            | 2.38E+01 |
| 73  | methylergometrine              | 5.32E+01 |
| 35  | articaine                      | 9.74E+01 |
| 25  | dexpanthenol                   | 6.68E+01 |
| 52  | piromidic_acid                 | 4.62E+01 |
| 19  | 16,16-dimethylprostaglandin_E2 | 1.07E+02 |
| 58  | tetryzoline                    | 8.22E+01 |
| 7   | mecamylamine                   | 8.08E-01 |
| 29  | iopamidol                      | 1.07E+02 |
| 90  | pipenzolate_bromide            | 1.07E+02 |
| 84  | butamben                       | 3.51E+00 |
| 62  | isradipine                     | 5.08E-05 |
| 7   | piroxicam                      | 2.51E-01 |
| 4   | thiamine                       | 8.27E+01 |
| 35  | aminocaproic_acid              | 8.17E+01 |
| 0   | propoxycaine                   | 1.07E+02 |
| 90  | anabasine                      | 1.07E+02 |
| 13  | demeclocycline                 | 9.94E-01 |
| 0   | ergocalciferol                 | 1.07E+02 |
| 58  | retrorsine                     | 6.80E+01 |
| 0   | dexamethasone                  | 1.07E+02 |
| 29  | primidone                      | 1.07E+02 |
| 44  | cobalt_chloride                | 1.01E+02 |
| 90  | norethisterone                 | 1.07E+02 |
| 13  | cefuroxime                     | 3.33E-01 |
| 94  | W-13                           | 5.63E+01 |
| 0   | hemicholinium                  | 1.06E+02 |
| 52  | fluorocurarine                 | 3.91E+01 |
| 89  | verteporfin                    | 4.82E+01 |
| 90  | clobetasol                     | 1.06E+02 |
| 87  | prednicarbate                  | 2.80E+01 |
| 100 | flupentixol                    | 1.89E-07 |
| 11  | spiradoline                    | 2.83E+01 |
| 90  | scopoletin                     | 1.06E+02 |
| 52  | xylazine                       | 2.74E+01 |
| 100 | sirolimus                      | 4.79E-08 |
| 83  | iopromide                      | 1.02E+02 |
| 20  | sulfachlorpyridazine           | 4.22E+01 |
| 52  | betahistine                    | 1.71E+01 |
| 100 | 5666823                        | 1.12E-08 |
| 31  | idazoxan                       | 1.07E+02 |

|     |                             |          |
|-----|-----------------------------|----------|
| 75  | rifampicin                  | 7.82E+01 |
| 93  | ofloxacin                   | 9.81E+01 |
| 0   | demecarium_bromide          | 1.06E+02 |
| 77  | paracetamol                 | 7.85E+01 |
| 88  | domperidone                 | 1.52E+01 |
| 43  | pizotifen                   | 1.06E+02 |
| 85  | estriol                     | 2.49E+01 |
| 85  | etomidate                   | 8.87E+00 |
| 32  | rimexolone                  | 3.22E+01 |
| 32  | acetylsalicylic_acid        | 2.14E+01 |
| 0   | 0225151-0000                | 1.06E+02 |
| 90  | tranlycypromine             | 1.06E+02 |
| 0   | stachydrine                 | 1.05E+02 |
| 74  | norfloxacin                 | 1.57E+01 |
| 52  | dimethadione                | 1.18E+01 |
| 44  | dopamine                    | 7.99E+01 |
| 17  | NU-1025                     | 6.02E+01 |
| 37  | niflumic_acid               | 3.05E+01 |
| 74  | phenindione                 | 6.01E+00 |
| 85  | azaperone                   | 2.24E+00 |
| 73  | alfuzosin                   | 3.73E+01 |
| 67  | sulfaquinoxaline            | 5.27E+01 |
| 29  | metronidazole               | 1.07E+02 |
| 29  | trihexyphenidyl             | 1.06E+02 |
| 42  | betaxolol                   | 1.24E+01 |
| 31  | doxylamine                  | 1.07E+02 |
| 22  | ciclacillin                 | 7.90E+01 |
| 14  | daunorubicin                | 8.77E+01 |
| 48  | chloroquine                 | 1.06E+02 |
| 91  | exisulind                   | 9.32E+01 |
| 79  | ozagrel                     | 1.05E+02 |
| 95  | propylthiouracil            | 9.66E+01 |
| 31  | pralidoxime                 | 1.06E+02 |
| 61  | budesonide                  | 1.47E+01 |
| 32  | lymecycline                 | 1.89E+01 |
| 38  | sulfadimethoxine            | 1.83E+01 |
| 19  | AH-6809                     | 1.07E+02 |
| 106 | etilefrine                  | 1.71E+01 |
| 89  | phentolamine                | 5.27E+01 |
| 32  | metacycline                 | 1.21E+01 |
| 41  | imidurea                    | 4.11E+01 |
| 50  | piperacillin                | 1.20E+01 |
| 22  | homosalate                  | 5.99E+01 |
| 90  | famprofazone                | 1.06E+02 |
| 39  | butirosin                   | 2.95E+01 |
| 100 | lasalocid                   | 8.56E-08 |
| 76  | neomycin                    | 9.45E+01 |
| 30  | Prestwick-864               | 8.33E+01 |
| 16  | trichostatin_A              | 1.13E+01 |
| 67  | indoprofen                  | 3.23E+01 |
| 76  | acetylsalicylsalicylic_acid | 6.69E+01 |
| 106 | zalcitabine                 | 5.13E+00 |
| 64  | hyoscyamine                 | 6.35E+00 |
| 32  | calcium_pantothenate        | 8.43E+00 |

|     |                           |          |
|-----|---------------------------|----------|
| 2   | 3-aminobenzamide          | 8.41E+01 |
| 41  | niridazole                | 1.94E+01 |
| 22  | levcycloserine            | 3.86E+01 |
| 49  | mesalazine                | 8.46E+01 |
| 31  | gemfibrozil               | 1.05E+02 |
| 0   | sulfabenzamide            | 1.06E+02 |
| 61  | tubocurarine_chloride     | 8.96E+00 |
| 9   | IC-86621                  | 1.06E+02 |
| 0   | etynodiol                 | 1.06E+02 |
| 96  | sulfaguanidine            | 1.06E+02 |
| 32  | ethotoin                  | 5.31E+00 |
| 0   | chlorpropamide            | 1.05E+02 |
| 81  | pirenperone               | 6.93E+01 |
| 72  | memantine                 | 1.06E+02 |
| 0   | pregnenolone              | 1.04E+02 |
| 31  | oxetacaine                | 1.02E+02 |
| 25  | triflupromazine           | 6.31E+01 |
| 89  | sotalol                   | 5.03E+01 |
| 6   | prednisone                | 2.78E+01 |
| 56  | dantrolene                | 9.94E+01 |
| 57  | 2-aminobenzenesulfonamide | 7.04E+01 |
| 90  | fluorometholone           | 1.07E+02 |
| 19  | AH-23848                  | 1.07E+02 |
| 22  | chlorambucil              | 2.14E+01 |
| 60  | vinpocetine               | 2.49E+01 |
| 38  | khellin                   | 4.47E+00 |
| 35  | alfadolone                | 7.64E+01 |
| 34  | nicergoline               | 1.06E-01 |
| 25  | metrifonate               | 3.87E+01 |
| 93  | nalidixic_acid            | 8.68E+01 |
| 90  | denatonium_benzoate       | 1.07E+02 |
| 20  | PHA-00851261E             | 2.40E+01 |
| 62  | antimycin_A               | 3.26E-04 |
| 48  | demecolcine               | 1.04E+02 |
| 2   | 4-hydroxyphenazone        | 5.02E+01 |
| 90  | Prestwick-1084            | 1.06E+02 |
| 20  | 0317956-0000              | 4.86E+00 |
| 100 | pimozide                  | 5.10E-07 |
| 90  | flunarizine               | 1.06E+02 |
| 3   | trifluridine              | 5.23E+01 |
| 0   | cromoglicic_acid          | 1.05E+02 |
| 82  | Prestwick-1083            | 1.01E+02 |
| 87  | bethanechol               | 1.73E+01 |
| 0   | pentetic_acid             | 1.04E+02 |
| 5   | azlocillin                | 4.52E+00 |
| 61  | etamivan                  | 5.83E+00 |
| 7   | noscapine                 | 1.12E+00 |
| 14  | fisetin                   | 8.60E+01 |
| 46  | pridinol                  | 4.66E+01 |
| 0   | pheniramine               | 1.03E+02 |
| 40  | vinburnine                | 3.34E+00 |
| 31  | levocabastine             | 9.87E+01 |
| 101 | pentolonium               | 6.06E+01 |
| 52  | crotamiton                | 2.22E+01 |

|     |                        |          |
|-----|------------------------|----------|
| 35  | Prestwick-972          | 5.48E+01 |
| 18  | 3-nitropropionic_acid  | 7.13E+01 |
| 7   | diflunisal             | 3.51E-01 |
| 79  | asiaticoside           | 9.88E+01 |
| 35  | tiletamine             | 2.78E+01 |
| 40  | nalbuphine             | 1.63E+00 |
| 61  | Prestwick-559          | 2.35E+00 |
| 85  | repaglinide            | 8.41E-01 |
| 90  | difenidol              | 1.06E+02 |
| 48  | 12,13-EODE             | 9.85E+01 |
| 40  | ionomycin              | 6.44E-01 |
| 89  | altizide               | 5.36E+01 |
| 27  | adiphenine             | 1.07E+02 |
| 29  | enoxacin               | 1.06E+02 |
| 99  | galantamine            | 1.03E+02 |
| 0   | cytisine               | 1.03E+02 |
| 6   | AR-A014418             | 2.35E+01 |
| 16  | idoxuridine            | 9.98E+00 |
| 89  | zimeldine              | 4.10E+01 |
| 90  | ranitidine             | 1.06E+02 |
| 55  | kinetin                | 7.80E+01 |
| 35  | enilconazole           | 1.02E+01 |
| 0   | ascorbic_acid          | 1.02E+02 |
| 32  | sulfametoxydiazine     | 9.59E+00 |
| 55  | estropipate            | 4.18E+01 |
| 32  | harman                 | 4.97E+00 |
| 86  | flucloxacillin         | 9.16E+01 |
| 45  | tetraethylenepentamine | 1.02E+02 |
| 67  | epitiostanol           | 2.42E+01 |
| 6   | hexylcaine             | 1.26E+01 |
| 100 | promazine              | 2.81E-06 |
| 80  | mefexamide             | 1.00E+02 |
| 26  | timolol                | 6.63E+01 |
| 90  | ethosuximide           | 1.06E+02 |
| 61  | trimetazidine          | 9.37E-01 |
| 43  | equilin                | 1.06E+02 |
| 72  | fluticasone            | 1.05E+02 |
| 96  | succinylsulfathiazole  | 1.01E+02 |
| 99  | reserpine              | 9.79E+01 |
| 27  | isoxicam               | 1.07E+02 |
| 95  | seneciophylline        | 9.60E+01 |
| 67  | tocainide              | 8.41E+00 |
| 34  | chlorphenamine         | 3.64E-02 |
| 0   | nizatidine             | 1.03E+02 |
| 89  | 8-azaguanine           | 3.58E+01 |
| 31  | sulfathiazole          | 9.59E+01 |
| 10  | CP-319743              | 9.32E+01 |
| 96  | minoxidil              | 8.15E+01 |
| 28  | fulvestrant            | 1.22E+01 |
| 77  | oxybenzone             | 6.01E+01 |
| 41  | chloramphenicol        | 1.29E+01 |
| 76  | pirenzepine            | 4.60E+01 |
| 86  | rilmnidine             | 6.05E+01 |
| 5   | methocarbamol          | 4.59E+00 |



|     |                     |          |
|-----|---------------------|----------|
| 90  | trazodone           | 1.06E+02 |
| 27  | isometheptene       | 1.07E+02 |
| 82  | iopanoic_acid       | 9.75E+01 |
| 47  | bacampicillin       | 1.05E+02 |
| 37  | fenofibrate         | 3.88E+01 |
| 99  | mestranol           | 8.91E+01 |
| 27  | carbimazole         | 1.06E+02 |
| 25  | atracurium_besilate | 2.99E+01 |
| 4   | monocrotaline       | 1.02E+02 |
| 6   | estradiol           | 7.38E+00 |
| 102 | meglumine           | 1.26E+00 |
| 90  | bezafibrate         | 1.06E+02 |
| 49  | racecadotril        | 8.72E+01 |
| 11  | CP-320650-01        | 2.74E+01 |
| 15  | diclofenamide       | 6.29E+01 |
| 40  | Y-27632             | 9.16E-01 |
| 58  | procyclidine        | 9.54E+01 |
| 59  | fludroxycortide     | 2.73E+00 |
| 22  | Prestwick-1080      | 1.93E+01 |
| 53  | emetine             | 7.30E+01 |
| 106 | naftopidil          | 2.81E+00 |
| 25  | sulfacetamide       | 1.14E+01 |
| 67  | ticarcillin         | 1.92E+00 |
| 6   | debrisoquine        | 2.71E+00 |
| 1   | novobiocin          | 3.86E+01 |
| 13  | tomatidine          | 5.39E+00 |
| 78  | clofibrate          | 8.02E+01 |
| 100 | lovastatin          | 1.77E-05 |
| 71  | ciprofibrate        | 2.97E+01 |
| 2   | probuco             | 2.22E+01 |
| 73  | hesperidin          | 4.28E+01 |
| 41  | Prestwick-920       | 3.15E+00 |
| 90  | omeprazole          | 1.06E+02 |
| 32  | nifedipine          | 8.14E+00 |
| 0   | PF-00539758-00      | 1.05E+02 |
| 81  | propranolol         | 5.21E+01 |
| 5   | pivmecillinam       | 2.84E+00 |
| 52  | doxazosin           | 3.69E+01 |
| 27  | clorsulon           | 1.06E+02 |
| 58  | benzthiazide        | 8.79E+01 |
| 90  | piperidolate        | 1.06E+02 |
| 29  | cefotiam            | 1.07E+02 |
| 80  | pentoxifylline      | 8.74E+01 |
| 32  | sulfaphenazole      | 4.66E+00 |
| 68  | carcinine           | 1.07E+02 |
| 90  | (-)-MK-801          | 1.05E+02 |
| 90  | ronidazole          | 1.04E+02 |
| 37  | acemetacin          | 2.42E+01 |
| 8   | probenecid          | 1.07E+02 |
| 17  | monastrol           | 3.52E+01 |
| 100 | procarbazine        | 1.43E-05 |
| 52  | rolitetracycline    | 2.65E+01 |
| 104 | semustine           | 7.24E+00 |
| 27  | thiamphenicol       | 1.04E+02 |

|     |                             |          |
|-----|-----------------------------|----------|
| 80  | cloxacillin                 | 5.53E+01 |
| 101 | riluzole                    | 4.38E+01 |
| 12  | carisoprodol                | 3.43E+01 |
| 58  | flumetasone                 | 7.62E+01 |
| 102 | dioxybenzone                | 3.22E-01 |
| 58  | fenoprofen                  | 5.65E+01 |
| 54  | bacitracin                  | 5.63E+01 |
| 7   | triamcinolone               | 9.02E-01 |
| 60  | bambuterol                  | 4.17E+01 |
| 45  | oxamic_acid                 | 8.41E+01 |
| 1   | arachidonyltrifluoromethane | 1.28E+01 |
| 68  | lactobionic_acid            | 1.07E+02 |
| 68  | guanfacine                  | 1.06E+02 |
| 0   | antazoline                  | 1.06E+02 |
| 24  | U0125                       | 3.75E+01 |
| 105 | yohimbic_acid               | 5.78E+01 |
| 8   | sisomicin                   | 1.07E+02 |
| 27  | ketotifen                   | 1.02E+02 |
| 104 | phenoxybenzamine            | 2.36E+00 |
| 29  | canadine                    | 1.06E+02 |
| 89  | desoxycortone               | 5.33E+01 |
| 100 | troglitazone                | 1.21E-05 |
| 43  | saquinavir                  | 1.05E+02 |
| 54  | trapidil                    | 1.95E+01 |
| 90  | pentoxyverine               | 1.06E+02 |
| 19  | PHA-00767505E               | 1.07E+02 |
| 19  | lobelanidine                | 1.07E+02 |
| 8   | fusaric_acid                | 1.05E+02 |
| 52  | cinoxacin                   | 2.21E+01 |
| 90  | ganciclovir                 | 1.05E+02 |
| 45  | copper_sulfate              | 3.95E+01 |
| 4   | carbamazepine               | 1.04E+02 |
| 14  | H-7                         | 9.66E+01 |
| 52  | dydrogesterone              | 1.20E+01 |
| 0   | praziquantel                | 1.06E+02 |
| 3   | 5255229                     | 7.91E+01 |
| 0   | chlormezanone               | 1.06E+02 |
| 90  | lorglumide                  | 1.04E+02 |
| 40  | econazole                   | 1.91E+00 |
| 0   | quipazine                   | 1.05E+02 |
| 90  | ifenprodil                  | 1.03E+02 |
| 97  | tolmetin                    | 5.70E+01 |
| 32  | todralazine                 | 6.30E+00 |
| 99  | theophylline                | 9.04E+01 |
| 13  | ramipril                    | 6.40E+00 |
| 69  | nifuroxazide                | 9.58E+01 |
| 55  | metoprolol                  | 2.21E+01 |
| 89  | ipratropium_bromide         | 4.80E+01 |
| 21  | cefamandole                 | 1.02E+02 |
| 90  | tropicamide                 | 1.01E+02 |
| 0   | megestrol                   | 1.05E+02 |
| 0   | harmalol                    | 1.03E+02 |
| 48  | 5252917                     | 1.00E+02 |
| 4   | canrenoic_acid              | 1.01E+02 |

|     |                       |          |
|-----|-----------------------|----------|
| 0   | 10-methoxyharmalan    | 1.01E+02 |
| 43  | naringenin            | 1.01E+02 |
| 90  | mevalolactone         | 9.98E+01 |
| 4   | molsidomine           | 9.36E+01 |
| 82  | flavoxate             | 9.72E+01 |
| 0   | PF-00539745-00        | 9.90E+01 |
| 13  | bupropion             | 2.61E+00 |
| 23  | SB-203580             | 1.01E+02 |
| 90  | cetirizine            | 9.74E+01 |
| 19  | zaprinast             | 1.07E+02 |
| 21  | PNU-0230031           | 8.78E+01 |
| 35  | atropine_methonitrate | 7.41E+00 |
| 7   | zidovudine            | 6.12E-01 |
| 90  | meclozine             | 9.40E+01 |
| 47  | cyanocobalamin        | 1.03E+02 |
| 78  | arachidonic_acid      | 4.46E+01 |
| 0   | gentamicin            | 9.77E+01 |
| 40  | PHA-00846566E         | 1.30E+00 |
| 49  | kanamycin             | 9.01E+01 |
| 53  | cephaeline            | 5.72E+01 |
| 42  | methazolamide         | 4.97E+01 |
| 52  | lomefloxacin          | 1.06E+01 |
| 100 | S-propranolol         | 7.31E-05 |
| 19  | sulfapyridine         | 1.07E+02 |
| 52  | bemegride             | 4.26E+00 |
| 0   | hymecromone           | 9.57E+01 |
| 36  | nystatin              | 1.07E+02 |
| 14  | ellipticine           | 9.27E+01 |
| 0   | lincomycin            | 9.10E+01 |
| 0   | netilmicin            | 8.40E+01 |
| 3   | 5248896               | 7.50E+01 |
| 0   | tetracaine            | 7.61E+01 |
| 33  | clebopride            | 1.07E+02 |
| 8   | phenacetin            | 1.04E+02 |
| 19  | cotinine              | 1.07E+02 |
| 99  | arcaine               | 8.32E+01 |
| 0   | cefepime              | 6.89E+01 |
| 90  | cortisone             | 9.69E+01 |
| 49  | alpha-estradiol       | 7.43E+01 |
| 3   | 5279552               | 5.66E+01 |
| 44  | quinpirole            | 8.19E+01 |
| 4   | metanephrine          | 8.96E+01 |
| 89  | methyldopa            | 5.21E+01 |
| 50  | sulfadimidine         | 1.69E+01 |
| 16  | fusidic_acid          | 2.65E+01 |
| 87  | ioxaglic_acid         | 1.71E+01 |
| 73  | diltiazem             | 3.77E+01 |
| 61  | piracetam             | 4.03E+00 |
| 82  | procaine              | 8.84E+01 |
| 33  | prazosin              | 1.07E+02 |
| 104 | 5194442               | 1.33E+00 |
| 5   | levothyroxine_sodium  | 7.12E+00 |
| 68  | pepstatin             | 1.06E+02 |
| 27  | viomycin              | 1.04E+02 |

|     |                       |          |
|-----|-----------------------|----------|
| 80  | meclofenamic_acid     | 3.02E+01 |
| 31  | isoxsuprine           | 1.05E+02 |
| 37  | diethylcarbamazine    | 2.33E+01 |
| 77  | nimodipine            | 3.94E+01 |
| 72  | harpagoside           | 1.07E+02 |
| 90  | naloxone              | 9.89E+01 |
| 43  | MK-886                | 9.51E+01 |
| 19  | AG-012559             | 1.07E+02 |
| 98  | TTNPB                 | 1.03E+02 |
| 100 | fluvoxamine           | 1.43E-04 |
| 74  | proxiphylline         | 4.18E+01 |
| 90  | prasterone            | 9.61E+01 |
| 101 | trimethoprim          | 2.52E+01 |
| 32  | chrysin               | 1.39E+01 |
| 29  | amikacin              | 1.07E+02 |
| 0   | midodrine             | 7.94E+01 |
| 90  | methapyrilene         | 9.23E+01 |
| 48  | (-)-catechin          | 9.64E+01 |
| 22  | lithocholic_acid      | 2.65E+01 |
| 71  | mephenytoin           | 2.07E+01 |
| 90  | aminophylline         | 8.70E+01 |
| 43  | ciclosporin           | 7.70E+01 |
| 31  | minaprine             | 1.02E+02 |
| 91  | sulindac_sulfide      | 1.00E+02 |
| 0   | folic_acid            | 7.49E+01 |
| 48  | DL-PPMP               | 7.79E+01 |
| 4   | pyridoxine            | 8.51E+01 |
| 32  | pancuronium_bromide   | 8.34E+00 |
| 95  | selegiline            | 1.03E+02 |
| 90  | furaltadone           | 8.34E+01 |
| 89  | dacarbazine           | 5.34E+01 |
| 19  | 0198306-0000          | 1.07E+02 |
| 39  | ribostamycin          | 3.53E+01 |
| 90  | phthalylsulfathiazole | 7.63E+01 |
| 89  | laudanosine           | 3.65E+01 |
| 79  | heptaminol            | 1.01E+02 |
| 52  | edrophonium_chloride  | 5.12E+00 |
| 81  | biperiden             | 3.61E+01 |
| 90  | etofenamate           | 6.88E+01 |
| 11  | PHA-00745360          | 2.37E+01 |
| 65  | pirinixic_acid        | 1.06E+02 |
| 89  | ginkgolide_A          | 2.26E+01 |
| 12  | hydrochlorothiazide   | 2.42E+01 |
| 32  | apigenin              | 4.60E+00 |
| 29  | ceforanide            | 1.07E+02 |
| 90  | zoxazolamine          | 6.21E+01 |
| 25  | mefenamic_acid        | 1.32E+01 |
| 99  | spectinomycin         | 7.94E+01 |
| 90  | methylprednisolone    | 5.18E+01 |
| 0   | captopril             | 8.05E+01 |
| 14  | alsterpaullone        | 9.35E+01 |
| 100 | diphenylpyraline      | 2.39E-04 |
| 93  | tiapride              | 9.85E+01 |
| 74  | roxithromycin         | 2.61E+01 |

|    |                                   |          |
|----|-----------------------------------|----------|
| 31 | amprolium                         | 9.94E+01 |
| 19 | dipivefrine                       | 1.07E+02 |
| 97 | tenoxicam                         | 5.32E+01 |
| 83 | cefoxitin                         | 1.07E+02 |
| 91 | phenyl_biguanide                  | 8.35E+01 |
| 76 | acenocoumarol                     | 4.01E+01 |
| 31 | cimetidine                        | 8.90E+01 |
| 69 | amiloride                         | 9.82E+01 |
| 29 | nitrofuraf                        | 1.06E+02 |
| 37 | bupivacaine                       | 1.05E+01 |
| 46 | gabapentin                        | 6.94E+01 |
| 27 | dapsone                           | 1.04E+02 |
| 21 | PNU-0293363                       | 7.73E+01 |
| 19 | pseudopelletierine                | 1.07E+02 |
| 60 | hexamethonium_bromide             | 7.18E+01 |
| 0  | streptozocin                      | 8.30E+01 |
| 52 | naringin                          | 2.76E+00 |
| 16 | rosiglitazone                     | 2.34E+01 |
| 62 | tribenoside                       | 4.00E-01 |
| 75 | mycophenolic_acid                 | 9.28E+01 |
| 0  | tridihexethyl                     | 7.59E+01 |
| 0  | dihydrostreptomycin               | 6.45E+01 |
| 19 | CAY-10397                         | 1.07E+02 |
| 4  | hydroflumethiazide                | 8.34E+01 |
| 69 | (+)-isoprenaline                  | 8.40E+01 |
| 5  | topiramate                        | 8.34E+00 |
| 49 | midecamycin                       | 7.43E+01 |
| 0  | sulfamethizole                    | 5.61E+01 |
| 4  | bromperidol                       | 6.39E+01 |
| 19 | hesperetin                        | 1.07E+02 |
| 0  | cyclic_adenosine_monophosphate    | 4.48E+01 |
| 13 | lidoflazine                       | 8.03E+00 |
| 0  | dizocilpine                       | 3.31E+01 |
| 18 | PF-01378883-00                    | 6.42E+01 |
| 9  | 16-phenyltetranorprostaglandin_E2 | 1.07E+02 |
| 33 | nomegestrol                       | 1.06E+02 |
| 27 | etiocholanolone                   | 1.02E+02 |
| 97 | carbenoxolone                     | 2.37E+01 |
| 31 | salsolidin                        | 7.98E+01 |
| 99 | atovaquone                        | 6.84E+01 |
| 65 | celecoxib                         | 1.00E+02 |
| 79 | betulin                           | 8.93E+01 |
| 8  | oxamniquine                       | 1.05E+02 |
| 86 | azapropazone                      | 5.61E+01 |
| 73 | dexibuprofen                      | 2.51E+01 |
| 74 | lisinopril                        | 1.13E+01 |
| 3  | kaempferol                        | 7.49E+01 |
| 27 | merbromin                         | 9.54E+01 |
| 19 | dehydrocholic_acid                | 1.07E+02 |
| 36 | levopropoxyphene                  | 1.06E+02 |
| 60 | acebutolol                        | 5.88E+01 |
| 90 | eucatropine                       | 8.28E+01 |
| 93 | griseofulvin                      | 8.51E+01 |
| 0  | loracarbef                        | 3.54E+01 |

|     |                             |          |
|-----|-----------------------------|----------|
| 0   | pindolol                    | 2.36E+01 |
| 90  | fluocinonide                | 7.45E+01 |
| 27  | nadolol                     | 8.20E+01 |
| 4   | quinostatin                 | 4.95E+01 |
| 14  | camptothecin                | 9.21E+01 |
| 82  | alfaxalone                  | 9.14E+01 |
| 90  | amiodarone                  | 6.57E+01 |
| 60  | guanethidine                | 3.29E+01 |
| 42  | ampyrone                    | 7.20E+01 |
| 14  | doxorubicin                 | 7.23E+01 |
| 53  | vanoxerine                  | 4.54E+01 |
| 23  | SC-19220                    | 9.77E+01 |
| 0   | aconitine                   | 1.96E+01 |
| 33  | coralyne                    | 1.04E+02 |
| 91  | tacrolimus                  | 5.33E+01 |
| 0   | isocorydine                 | 1.17E+01 |
| 29  | tranexamic_acid             | 1.07E+02 |
| 8   | tolazamide                  | 1.03E+02 |
| 100 | fluoxetine                  | 2.57E-03 |
| 40  | tyrphostin_AG-1478          | 1.73E+01 |
| 96  | tolazoline                  | 9.41E+01 |
| 89  | solanine                    | 4.23E+01 |
| 30  | suprofen                    | 9.87E+01 |
| 5   | aminoglutethimide           | 4.45E+00 |
| 72  | benzathine_benzylpenicillin | 1.07E+02 |
| 27  | homatropine                 | 6.67E+01 |
| 29  | boldine                     | 1.06E+02 |
| 90  | promethazine                | 7.01E+01 |
| 89  | tracazolate                 | 2.42E+01 |
| 19  | propranolol_bromide         | 1.07E+02 |
| 26  | thiopropamide               | 9.09E+01 |
| 95  | tobramycin                  | 1.05E+02 |
| 61  | oleandomycin                | 8.89E+00 |
| 29  | fludrocortisone             | 1.04E+02 |
| 19  | caffeic_acid                | 1.07E+02 |
| 0   | yohimbine                   | 1.16E+01 |
| 90  | pyrazinamide                | 6.40E+01 |
| 90  | oxybuprocaine               | 4.95E+01 |
| 32  | harmol                      | 1.82E+01 |
| 47  | cefixime                    | 1.05E+02 |
| 31  | phenazone                   | 7.65E+01 |
| 16  | valproic_acid               | 1.66E+01 |
| 94  | benserazide                 | 7.58E+01 |
| 49  | dexverapamil                | 6.67E+01 |
| 44  | indometacin                 | 6.80E+01 |
| 32  | harmine                     | 7.26E+00 |
| 6   | Prestwick-675               | 4.15E+01 |
| 42  | hydrastinine                | 5.60E+01 |
| 19  | depropine                   | 1.07E+02 |
| 6   | aceclofenac                 | 1.33E+01 |
| 83  | pyrithyldione               | 1.07E+02 |
| 72  | methylodopate               | 1.07E+02 |
| 82  | piribedil                   | 7.84E+01 |
| 9   | 11-deoxy-16,16-             | 1.06E+02 |

|    | dimethylprostaglandin_E2    |          |
|----|-----------------------------|----------|
| 49 | mepyramine                  | 3.03E+01 |
| 19 | salsolinol                  | 1.07E+02 |
| 56 | vincamine                   | 1.04E+02 |
| 0  | Prestwick-1103              | 1.22E+01 |
| 68 | dl-alpha_tocopherol         | 1.07E+02 |
| 99 | theobromine                 | 6.50E+01 |
| 19 | pipemidic_acid              | 1.07E+02 |
| 83 | chlortalidone               | 1.05E+02 |
| 48 | 3-hydroxy-DL-kynurenine     | 8.54E+01 |
| 96 | cyclopenthiiazide           | 6.58E+01 |
| 47 | neostigmine_bromide         | 9.65E+01 |
| 82 | phensuximide                | 4.11E+01 |
| 90 | metamizole_sodium           | 6.20E+01 |
| 68 | piperine                    | 1.06E+02 |
| 0  | myosmine                    | 8.06E+00 |
| 36 | Prestwick-682               | 1.06E+02 |
| 90 | sulfafurazole               | 4.90E+01 |
| 68 | mebhydrolin                 | 1.02E+02 |
| 90 | cefalexin                   | 3.36E+01 |
| 69 | dobutamine                  | 8.50E+01 |
| 8  | nafcillin                   | 1.01E+02 |
| 29 | isoniazid                   | 1.04E+02 |
| 60 | tetracycline                | 2.45E+01 |
| 72 | methoxamine                 | 1.06E+02 |
| 88 | androsterone                | 6.44E+01 |
| 0  | metampicillin               | 4.64E+00 |
| 8  | 6-azathymine                | 8.39E+01 |
| 79 | diphenhydramine             | 7.10E+01 |
| 8  | etifenin                    | 4.37E+01 |
| 19 | PF-00562151-00              | 1.07E+02 |
| 52 | cisapride                   | 9.59E+00 |
| 19 | sulpiride                   | 1.07E+02 |
| 15 | pilocarpine                 | 7.84E+01 |
| 83 | sulfamonomethoxine          | 9.74E+01 |
| 13 | hydroxyachillin             | 1.56E+01 |
| 58 | levonorgestrel              | 1.06E+02 |
| 29 | sulmazole                   | 1.01E+02 |
| 29 | ambroxol                    | 8.74E+01 |
| 58 | dorzolamide                 | 1.04E+02 |
| 68 | 7-aminocephalosporanic_acid | 9.10E+01 |
| 26 | finasteride                 | 6.97E+01 |
| 68 | lumicolchicine              | 5.28E+01 |
| 99 | canavanine                  | 4.02E+01 |
| 72 | iohexol                     | 1.04E+02 |
| 31 | pyrimethamine               | 7.40E+01 |
| 43 | diethylstilbestrol          | 9.51E+01 |
| 48 | phenanthridinone            | 5.88E+01 |
| 65 | imatinib                    | 8.79E+01 |
| 19 | oxybutynin                  | 1.07E+02 |
| 10 | BCB000039                   | 1.05E+02 |
| 58 | buflovedil                  | 9.71E+01 |
| 57 | felbinac                    | 1.04E+02 |
| 47 | N-acetylmuramic_acid        | 7.40E+01 |

|     |                          |          |
|-----|--------------------------|----------|
| 72  | cefaclor                 | 9.27E+01 |
| 19  | dinoprostone             | 1.07E+02 |
| 3   | apomorphine              | 9.73E+01 |
| 4   | depudecin                | 7.34E+01 |
| 19  | benfluorex               | 1.07E+02 |
| 69  | nocodazole               | 6.06E+01 |
| 83  | doxycycline              | 7.24E+01 |
| 19  | 0316684-0000             | 1.07E+02 |
| 36  | benzocaine               | 1.03E+02 |
| 46  | hecogenin                | 7.36E+01 |
| 0   | N-phenylanthranilic_acid | 8.96E+00 |
| 19  | STOCK1N-28457            | 1.07E+02 |
| 19  | glycocholic_acid         | 1.07E+02 |
| 9   | BCB000038                | 1.05E+02 |
| 89  | dipyridamole             | 5.58E+01 |
| 58  | butyl_hydroxybenzoate    | 8.47E+01 |
| 7   | 5186324                  | 3.21E+01 |
| 42  | chlortetracycline        | 5.27E+01 |
| 19  | SB-202190                | 1.07E+02 |
| 89  | epivincamine             | 2.35E+01 |
| 95  | L-methionine_sulfoximine | 1.06E+02 |
| 19  | genistein                | 1.07E+02 |
| 27  | pheneticillin            | 8.85E+01 |
| 19  | disopyramide             | 1.07E+02 |
| 90  | nifurtimox               | 8.44E+01 |
| 4   | butacaine                | 4.73E+01 |
| 3   | hycanthone               | 8.91E+01 |
| 23  | pioglitazone             | 9.15E+01 |
| 98  | tomelukast               | 1.06E+02 |
| 19  | PHA-00816795             | 1.07E+02 |
| 19  | H-89                     | 1.07E+02 |
| 105 | Prestwick-691            | 8.95E+01 |
| 90  | xylometazoline           | 7.64E+01 |
| 58  | fenbufen                 | 5.76E+01 |
| 56  | ethisterone              | 9.68E+01 |
| 40  | 5230742                  | 7.38E+01 |
| 29  | mafenide                 | 9.22E+01 |
| 90  | ketanserin               | 6.01E+01 |
| 70  | meteneprost              | 1.07E+02 |
| 19  | levodopa                 | 1.07E+02 |
| 57  | xamoterol                | 9.27E+01 |
| 10  | BCB000040                | 9.57E+01 |
| 40  | primaquine               | 4.09E+01 |
| 90  | monobenzone              | 4.07E+01 |
| 93  | metaraminol              | 9.18E+01 |
| 22  | Prestwick-984            | 7.94E+01 |
| 14  | staurosporine            | 1.02E+02 |
| 72  | fursultiamine            | 8.28E+01 |
| 21  | PNU-0251126              | 9.35E+01 |
| 95  | benperidol               | 1.05E+02 |
| 75  | methotrexate             | 9.84E+01 |
| 98  | iloprost                 | 9.87E+01 |
| 31  | SR-95531                 | 7.69E+01 |
| 90  | sulfamethoxazole         | 2.37E+01 |



|    |                          |          |
|----|--------------------------|----------|
| 19 | AG-013608                | 1.07E+02 |
| 33 | carteolol                | 1.07E+02 |
| 29 | moroxydine               | 7.60E+01 |
| 19 | metolazone               | 1.07E+02 |
| 19 | practolol                | 1.07E+02 |
| 32 | irinotecan               | 6.19E+01 |
| 43 | betulinic_acid           | 9.51E+01 |
| 0  | 6-bromoindirubin-3-oxime | 4.03E+01 |
| 19 | glipizide                | 1.07E+02 |
| 19 | adenosine_phosphate      | 1.07E+02 |
| 19 | nilutamide               | 1.07E+02 |
| 3  | 5182598                  | 8.97E+01 |
| 36 | amantadine               | 1.02E+02 |
| 95 | cefadroxil               | 9.91E+01 |
| 19 | alprenolol               | 1.07E+02 |
| 33 | arecoline                | 1.03E+02 |
| 9  | CP-944629                | 1.04E+02 |
| 30 | levobunolol              | 1.05E+02 |
| 27 | chlorogenic_acid         | 9.98E+01 |
| 70 | CP-863187                | 1.07E+02 |
| 19 | PHA-00665752             | 1.07E+02 |
| 19 | harmaline                | 9.91E+01 |
| 14 | tyrphostin_AG-825        | 1.06E+02 |
| 70 | suramin_sodium           | 1.07E+02 |

(b)

| Community | Drug                     | Enrichment P-val |
|-----------|--------------------------|------------------|
| 19        | glipizide                | 4.01E+00         |
| 9         | CP-944629                | 8.16E-01         |
| 0         | 6-bromoindirubin-3-oxime | 1.78E+01         |
| 32        | irinotecan               | 1.22E+01         |
| 70        | CP-863187                | 1.63E+00         |
| 19        | nilutamide               | 2.00E+00         |
| 14        | tyrphostin_AG-825        | 8.31E+00         |
| 19        | 0198306-0000             | 2.59E-01         |
| 43        | betulinic_acid           | 6.46E+00         |
| 19        | adenosine_phosphate      | 3.31E-02         |
| 14        | staurosporine            | 6.80E-01         |
| 19        | AG-013608                | 4.16E-03         |
| 75        | methotrexate             | 4.19E+00         |
| 19        | harmaline                | 5.17E-04         |
| 19        | alprenolol               | 3.66E-05         |
| 30        | levobunolol              | 5.14E+00         |
| 19        | STOCK1N-28457            | 4.34E-06         |
| 14        | GW-8510                  | 9.60E-02         |
| 33        | arecoline                | 9.00E+00         |
| 3         | apomorphine              | 2.73E+01         |
| 86        | azapropazone             | 6.71E+00         |
| 72        | methyl dopate            | 1.83E+01         |
| 29        | isoniazid                | 3.35E+01         |
| 29        | moroxydine               | 5.86E+00         |

|     |                       |          |
|-----|-----------------------|----------|
| 19  | SB-202190             | 9.46E-06 |
| 19  | practolol             | 7.62E-07 |
| 90  | cefalexin             | 8.74E+01 |
| 70  | suramin_sodium        | 2.76E-01 |
| 95  | cefadroxil            | 2.15E+01 |
| 46  | hecogenin             | 1.61E+01 |
| 90  | ganciclovir           | 6.08E+01 |
| 4   | 5286656               | 4.20E+01 |
| 19  | levodopa              | 7.12E-07 |
| 29  | fludrocortisone       | 1.66E+00 |
| 31  | phenazone             | 3.97E+01 |
| 19  | salsolinol            | 1.29E-07 |
| 72  | cefaclor              | 3.90E+00 |
| 19  | PHA-00665752          | 1.57E-08 |
| 10  | BCB000040             | 1.22E+01 |
| 29  | enoxacin              | 3.29E-01 |
| 3   | 5248896               | 1.25E+01 |
| 58  | benzthiazide          | 4.77E+01 |
| 89  | epivincamine          | 7.20E+01 |
| 48  | phenanthridinone      | 2.84E+01 |
| 70  | meteneprost           | 1.59E-02 |
| 58  | butyl_hydroxybenzoate | 1.39E+01 |
| 68  | dl-alpha_tocopherol   | 3.29E+01 |
| 19  | H-89                  | 3.12E-08 |
| 19  | 0316684-0000          | 2.81E-09 |
| 32  | harmol                | 4.75E+01 |
| 83  | chlortalidone         | 2.60E+01 |
| 90  | sulfamethoxazole      | 6.63E+01 |
| 19  | hesperetin            | 6.61E-10 |
| 19  | metolazone            | 5.49E-11 |
| 90  | naloxone              | 4.57E+01 |
| 27  | chlorogenic_acid      | 5.85E+01 |
| 90  | ketanserin            | 2.75E+01 |
| 12  | hydrochlorothiazide   | 2.91E+01 |
| 105 | Prestwick-691         | 2.21E+01 |
| 69  | nocodazole            | 4.02E+01 |
| 72  | iohexol               | 1.30E+00 |
| 19  | sulpiride             | 4.63E-11 |
| 8   | etifenin              | 4.49E+01 |
| 22  | Prestwick-1080        | 4.85E+01 |
| 58  | bufloxedil            | 5.98E+00 |
| 98  | iloprost              | 2.00E+01 |
| 27  | adiphenine            | 2.51E+01 |
| 36  | amantadine            | 2.94E+01 |
| 72  | methoxamine           | 1.89E-01 |
| 32  | calcium_pantothenate  | 3.71E+01 |
| 57  | xamoterol             | 2.61E+01 |
| 3   | 5182598               | 8.78E+00 |
| 58  | meprylcaine           | 1.61E+00 |
| 89  | 8-azaguanine          | 6.06E+01 |
| 19  | oxybutynin            | 1.35E-10 |
| 77  | paracetamol           | 2.28E+01 |
| 4   | depudecin             | 3.54E+01 |
| 27  | nadolol               | 9.31E+00 |

|     |                          |          |
|-----|--------------------------|----------|
| 68  | pepstatin                | 1.26E+01 |
| 4   | quinostatin              | 1.27E+01 |
| 29  | mafenide                 | 7.96E-01 |
| 36  | benzocaine               | 5.28E+00 |
| 0   | metampicillin            | 1.03E+02 |
| 0   | gentamicin               | 9.48E+01 |
| 90  | etofenamate              | 4.36E+01 |
| 42  | ampyrone                 | 6.86E+01 |
| 91  | exisulind                | 3.12E+01 |
| 47  | N-acetylmuramic_acid     | 3.66E+01 |
| 68  | guanfacine               | 2.75E+00 |
| 105 | yohimbic_acid            | 4.36E+00 |
| 89  | picrotoxinin             | 4.34E+01 |
| 37  | acemetacin               | 6.25E+01 |
| 89  | zimeldine                | 2.17E+01 |
| 72  | fursultiamine            | 6.01E-02 |
| 93  | metaraminol              | 3.90E+01 |
| 90  | monobenzone              | 3.83E+01 |
| 0   | sulfasalazine            | 8.98E+01 |
| 21  | PNU-0251126              | 4.00E+01 |
| 95  | benperidol               | 1.83E+01 |
| 7   | 5186324                  | 9.26E+01 |
| 68  | mebhydrolin              | 5.23E-01 |
| 95  | L-methionine_sulfoximine | 3.94E+00 |
| 19  | disopyramide             | 6.33E-09 |
| 52  | naringin                 | 9.83E+01 |
| 27  | homatropine              | 5.33E+00 |
| 19  | sulfapyridine            | 1.11E-09 |
| 19  | CAY-10397                | 1.25E-10 |
| 19  | caffeic_acid             | 1.31E-11 |
| 83  | sulfamonomethoxine       | 1.17E+01 |
| 98  | TTNPB                    | 4.02E+00 |
| 93  | tiapride                 | 9.13E+00 |
| 33  | carteolol                | 9.27E+00 |
| 96  | cyclopenthiazide         | 3.89E+01 |
| 4   | butacaine                | 9.51E+00 |
| 90  | xylometazoline           | 4.18E+01 |
| 19  | PHA-00816795             | 5.92E-12 |
| 22  | Prestwick-984            | 3.12E+01 |
| 32  | thioguanosine            | 5.07E+01 |
| 86  | flucloxacillin           | 4.66E+00 |
| 69  | nifuroxazide             | 2.48E+01 |
| 4   | pyridoxine               | 3.32E+00 |
| 31  | SR-95531                 | 5.14E+01 |
| 82  | piribedil                | 6.73E+01 |
| 56  | ethisterone              | 2.76E+01 |
| 19  | AH-6809                  | 3.12E-12 |
| 8   | 6-azathymine             | 3.07E+01 |
| 91  | sulindac_sulfide         | 8.22E+00 |
| 90  | methylprednisolone       | 3.91E+01 |
| 0   | netilmicin               | 9.57E+01 |
| 14  | doxorubicin              | 5.71E+00 |
| 33  | clebopride               | 1.67E+00 |
| 40  | primaquine               | 1.05E+02 |

|    |                             |          |
|----|-----------------------------|----------|
| 89 | dipyridamole                | 2.55E+01 |
| 23 | pioglitazone                | 3.76E+01 |
| 72 | benzathine_benzylpenicillin | 3.45E-02 |
| 58 | fenbufen                    | 3.38E+00 |
| 90 | zoxazolamine                | 3.30E+01 |
| 9  | BCB000038                   | 9.54E+00 |
| 36 | levopropoxyphene            | 1.97E+00 |
| 4  | hydroflumethiazide          | 1.57E+00 |
| 29 | ambroxol                    | 2.07E+00 |
| 8  | nafcillin                   | 1.15E+01 |
| 57 | felbinac                    | 1.02E+01 |
| 68 | piperine                    | 2.57E-01 |
| 19 | benfluorex                  | 1.21E-11 |
| 0  | tridihexethyl               | 9.41E+01 |
| 29 | tranexamic_acid             | 6.24E-01 |
| 52 | edrophonium_chloride        | 9.32E+01 |
| 75 | mycophenolic_acid           | 7.08E+00 |
| 91 | phenyl_biguanide            | 1.33E+00 |
| 91 | tacrolimus                  | 8.32E-02 |
| 2  | probutol                    | 4.17E+01 |
| 97 | carbenoxolone               | 7.22E+01 |
| 0  | lincomycin                  | 8.81E+01 |
| 48 | 3-hydroxy-DL-kynurenine     | 3.10E+01 |
| 19 | genistein                   | 7.59E-12 |
| 14 | azacitidine                 | 2.75E+00 |
| 0  | streptozocin                | 7.84E+01 |
| 90 | ronidazole                  | 3.86E+01 |
| 99 | theobromine                 | 8.99E+01 |
| 19 | dinoprostone                | 1.63E-12 |
| 0  | chlormezanone               | 6.74E+01 |
| 90 | Prestwick-674               | 2.90E+01 |
| 98 | tomelukast                  | 7.52E-01 |
| 82 | phensuximide                | 3.91E+01 |
| 31 | pyrimethamine               | 3.94E+01 |
| 89 | tracazolate                 | 2.54E+01 |
| 43 | naringenin                  | 3.47E+01 |
| 90 | clorgiline                  | 2.23E+01 |
| 90 | metamizole_sodium           | 1.42E+01 |
| 3  | kaempferol                  | 2.45E+01 |
| 60 | hexamethonium_bromide       | 9.74E+01 |
| 29 | cefotiam                    | 3.75E-01 |
| 40 | 5230742                     | 1.03E+02 |
| 0  | N-phenylanthranilic_acid    | 6.36E+01 |
| 95 | selegiline                  | 3.68E+00 |
| 0  | pindolol                    | 5.06E+01 |
| 36 | Prestwick-682               | 4.26E-01 |
| 47 | cefixime                    | 2.06E+01 |
| 60 | tetracycline                | 7.51E+01 |
| 90 | nifurtimox                  | 1.25E+01 |
| 6  | AR-A014418                  | 1.01E+02 |
| 49 | alpha-estradiol             | 8.96E+01 |
| 58 | meclofenoxate               | 3.27E+00 |
| 8  | probenecid                  | 6.09E+00 |
| 4  | decitabine                  | 1.69E+00 |

|     |                                   |          |
|-----|-----------------------------------|----------|
| 79  | diphenhydramine                   | 5.76E+01 |
| 47  | neostigmine_bromide               | 4.48E+00 |
| 65  | pirinixic_acid                    | 4.00E+01 |
| 27  | viomycin                          | 1.14E+01 |
| 26  | finasteride                       | 6.55E+01 |
| 48  | 12,13-EODE                        | 1.42E+01 |
| 31  | levocabastine                     | 2.50E+01 |
| 0   | loracarbef                        | 5.08E+01 |
| 40  | dienestrol                        | 9.77E+01 |
| 90  | aminophylline                     | 1.27E+01 |
| 1   | novobiocin                        | 6.69E+01 |
| 73  | dexibuprofen                      | 8.27E+01 |
| 94  | benserazide                       | 4.18E+01 |
| 19  | pseudopelletierine                | 6.61E-11 |
| 4   | molsidomine                       | 6.87E-01 |
| 33  | prazosin                          | 6.86E-01 |
| 0   | myosmine                          | 4.45E+01 |
| 36  | nystatin                          | 4.94E-02 |
| 3   | hycanthone                        | 1.75E+01 |
| 90  | ethosuximide                      | 1.07E+01 |
| 32  | harmine                           | 8.18E+01 |
| 9   | 16-phenyltetranorprostaglandin_E2 | 3.30E+00 |
| 78  | arachidonic_acid                  | 4.35E+01 |
| 60  | guanethidine                      | 5.67E+01 |
| 100 | diphenylpyraline                  | 1.07E+02 |
| 23  | SB-203580                         | 1.34E+01 |
| 19  | pipemidic_acid                    | 4.22E-11 |
| 19  | AH-23848                          | 5.01E-12 |
| 42  | chlortetracycline                 | 7.85E+01 |
| 29  | iopamidol                         | 3.92E-01 |
| 52  | cinoxacin                         | 9.61E+01 |
| 8   | fusaric_acid                      | 2.56E+00 |
| 82  | nabumetone                        | 2.42E+01 |
| 15  | pilocarpine                       | 5.58E+01 |
| 0   | hymecromone                       | 4.56E+01 |
| 0   | pentetic_acid                     | 3.40E+01 |
| 39  | ribostamycin                      | 6.50E+01 |
| 99  | canavanine                        | 7.71E+01 |
| 0   | 10-methoxyharmalan                | 2.52E+01 |
| 37  | diethylcarbamazine                | 6.86E+01 |
| 0   | captopril                         | 1.75E+01 |
| 105 | conessine                         | 4.25E+00 |
| 55  | estropipate                       | 6.62E+01 |
| 74  | naproxen                          | 1.00E+02 |
| 32  | ethotoin                          | 7.62E+01 |
| 90  | mevalolactone                     | 1.54E+01 |
| 52  | bemegrade                         | 8.67E+01 |
| 44  | dopamine                          | 5.84E+01 |
| 27  | pheneticillin                     | 9.26E+00 |
| 19  | glycocholic_acid                  | 9.86E-12 |
| 90  | sulfafurazole                     | 1.13E+01 |
| 19  | propantheline_bromide             | 1.27E-12 |
| 8   | pronetalol                        | 7.61E-01 |
| 48  | (-)-catechin                      | 6.91E+00 |

|     |                                         |          |
|-----|-----------------------------------------|----------|
| 19  | AG-012559                               | 1.75E-13 |
| 90  | methapyrilene                           | 8.05E+00 |
| 22  | chlorambucil                            | 4.18E+01 |
| 102 | fluvastatin                             | 1.03E+02 |
| 29  | sulmazole                               | 2.40E-01 |
| 11  | PHA-00745360                            | 8.22E+01 |
| 16  | rosiglitazone                           | 1.03E+02 |
| 62  | tribenoside                             | 1.07E+02 |
| 80  | pentoxifylline                          | 6.98E+01 |
| 49  | dexverapamil                            | 7.49E+01 |
| 27  | tolnaftate                              | 4.36E+00 |
| 48  | demecolcine                             | 1.75E+00 |
| 14  | camptothecin                            | 5.54E+00 |
| 58  | levonorgestrel                          | 4.62E+00 |
| 52  | betahistine                             | 7.75E+01 |
| 9   | 11-deoxy-16,16-dimethylprostaglandin_E2 | 6.49E-01 |
| 29  | nitrofurazone                           | 7.92E-02 |
| 42  | hydrastinine                            | 6.34E+01 |
| 29  | boldine                                 | 1.62E-02 |
| 58  | dorzolamide                             | 1.60E+00 |
| 65  | celecoxib                               | 1.10E+01 |
| 83  | doxycycline                             | 1.58E+01 |
| 90  | furaltadone                             | 9.93E+00 |
| 40  | 5253409                                 | 1.01E+02 |
| 16  | spironolactone                          | 9.27E+01 |
| 96  | sulfaguanidine                          | 2.88E+01 |
| 27  | etiocholanolone                         | 1.88E+00 |
| 90  | prasterone                              | 7.09E+00 |
| 96  | tolazoline                              | 6.62E+00 |
| 43  | diethylstilbestrol                      | 2.98E+01 |
| 90  | sulfinpyrazone                          | 4.59E+00 |
| 25  | mefenamic_acid                          | 9.67E+01 |
| 65  | imatinib                                | 9.62E-01 |
| 74  | hydralazine                             | 8.84E+01 |
| 32  | sulfametoxydiazine                      | 7.96E+01 |
| 47  | cyanocobalamin                          | 2.17E+00 |
| 8   | tolazamide                              | 2.85E-01 |
| 90  | oxybuprocaine                           | 3.39E+00 |
| 37  | dimenhydrinate                          | 5.22E+01 |
| 21  | PNU-0230031                             | 4.05E+01 |
| 99  | atovaquone                              | 6.49E+01 |
| 94  | W-13                                    | 1.27E+01 |
| 14  | fisetin                                 | 2.84E+00 |
| 13  | hydroxyachillin                         | 1.07E+02 |
| 5   | aminoglutethimide                       | 1.07E+02 |
| 24  | U0125                                   | 5.60E+01 |
| 0   | pheniramine                             | 4.51E+01 |
| 29  | furosemide                              | 8.63E-03 |
| 102 | dioxybenzone                            | 9.62E+01 |
| 48  | paclitaxel                              | 5.50E-01 |
| 10  | BCB000039                               | 2.31E+01 |
| 69  | dobutamine                              | 4.20E+01 |
| 37  | fenofibrate                             | 2.91E+01 |

|     |                                |          |
|-----|--------------------------------|----------|
| 19  | PF-00562151-00                 | 1.25E-11 |
| 0   | isocorydine                    | 3.92E+01 |
| 83  | pyrithyldione                  | 5.36E+00 |
| 14  | mitoxantrone                   | 9.76E-01 |
| 49  | mepyramine                     | 5.76E+01 |
| 100 | fluoxetine                     | 1.07E+02 |
| 0   | cyclic_adenosine_monophosphate | 3.17E+01 |
| 37  | bupivacaine                    | 1.26E+01 |
| 68  | lumicolchicine                 | 1.38E+00 |
| 14  | alsterpaullone                 | 2.40E-01 |
| 42  | ajmaline                       | 5.07E+01 |
| 8   | phenacetin                     | 7.25E-02 |
| 68  | 7-aminocephalosporanic_acid    | 2.38E-01 |
| 3   | 5211181                        | 2.93E+01 |
| 4   | bromperidol                    | 2.93E+00 |
| 33  | nomegestrol                    | 3.70E-01 |
| 44  | quinpirole                     | 2.56E+01 |
| 41  | roxarsone                      | 9.78E+01 |
| 1   | arachidonyltrifluoromethane    | 4.69E+01 |
| 0   | yohimbine                      | 2.97E+01 |
| 67  | tocainide                      | 1.00E+02 |
| 0   | cyclopentolate                 | 2.20E+01 |
| 60  | josamycin                      | 6.60E+01 |
| 104 | 5194442                        | 1.06E+02 |
| 81  | biperiden                      | 8.05E+01 |
| 94  | tioguanine                     | 1.54E+00 |
| 0   | Prestwick-1103                 | 1.68E+01 |
| 82  | alfaxalone                     | 2.27E+01 |
| 99  | spectinomycin                  | 4.97E+01 |
| 88  | androsterone                   | 8.75E+01 |
| 72  | harpagoside                    | 7.38E-01 |
| 89  | solanine                       | 8.02E+01 |
| 30  | suprofen                       | 2.78E+01 |
| 0   | PF-00539745-00                 | 1.33E+01 |
| 90  | pentoxyverine                  | 1.13E+01 |
| 29  | ceforanide                     | 6.70E-03 |
| 6   | Prestwick-675                  | 1.04E+02 |
| 40  | dicycloverine                  | 1.03E+02 |
| 19  | mebeverine                     | 7.98E-11 |
| 79  | heptaminol                     | 4.03E+01 |
| 90  | lorglumide                     | 8.54E+00 |
| 52  | cisapride                      | 8.78E+01 |
| 55  | metoprolol                     | 4.08E+01 |
| 77  | nimodipine                     | 2.93E+01 |
| 32  | pancuronium_bromide            | 8.88E+01 |
| 35  | articaine                      | 9.99E+01 |
| 16  | diprophylline                  | 8.86E+01 |
| 46  | gabapentin                     | 6.22E+01 |
| 0   | dizocilpine                    | 1.30E+01 |
| 100 | fluvoxamine                    | 1.07E+02 |
| 33  | coralyne                       | 3.41E-02 |
| 13  | ifosfamide                     | 1.07E+02 |
| 84  | butamben                       | 8.40E+01 |
| 19  | glafenine                      | 4.00E-11 |

|     |                       |          |
|-----|-----------------------|----------|
| 60  | acebutolol            | 5.21E+01 |
| 90  | promethazine          | 8.46E+00 |
| 89  | altizide              | 7.41E+01 |
| 0   | harmalol              | 1.08E+01 |
| 30  | Prestwick-864         | 6.61E+00 |
| 61  | piracetam             | 1.07E+02 |
| 44  | indometacin           | 6.72E+00 |
| 58  | retrorsine            | 3.37E+00 |
| 19  | PHA-00767505E         | 1.03E-11 |
| 31  | amprolium             | 5.49E+01 |
| 52  | palmatine             | 8.08E+01 |
| 57  | vancomycin            | 1.39E+01 |
| 28  | fulvestrant           | 8.56E+01 |
| 56  | dantrolene            | 1.99E+01 |
| 13  | lidoflazine           | 1.05E+02 |
| 79  | betulin               | 1.43E+01 |
| 56  | vincamine             | 2.29E+00 |
| 52  | dimethadione          | 6.73E+01 |
| 32  | vidarabine            | 8.63E+01 |
| 90  | pyrazinamide          | 9.13E+00 |
| 95  | tobramycin            | 1.27E+01 |
| 99  | theophylline          | 3.82E+01 |
| 31  | minaprine             | 3.65E+01 |
| 41  | imidurea              | 8.28E+01 |
| 32  | apigenin              | 7.60E+01 |
| 90  | amiodarone            | 6.86E+00 |
| 68  | carbarsone            | 1.14E-01 |
| 58  | procyclidine          | 1.55E+00 |
| 106 | naftopidil            | 1.02E+02 |
| 67  | epitiostanol          | 8.90E+01 |
| 40  | tyrphostin_AG-1478    | 1.03E+02 |
| 0   | midodrine             | 1.48E+01 |
| 83  | cefoxitin             | 2.64E+00 |
| 31  | cimetidine            | 2.13E+01 |
| 74  | lisinopril            | 8.82E+01 |
| 16  | valproic_acid         | 7.86E+01 |
| 0   | lidocaine             | 1.11E+01 |
| 6   | aceclofenac           | 1.02E+02 |
| 89  | cantharidin           | 7.23E+01 |
| 90  | phthalylsulfathiazole | 6.55E+00 |
| 19  | cotinine              | 2.40E-11 |
| 6   | 5149715               | 9.23E+01 |
| 13  | cefuroxime            | 1.03E+02 |
| 90  | famprofazone          | 4.52E+00 |
| 32  | chrysin               | 7.01E+01 |
| 80  | meclofenamic_acid     | 5.05E+01 |
| 40  | PHA-00846566E         | 1.00E+02 |
| 61  | gliclazide            | 1.06E+02 |
| 52  | doxazosin             | 6.22E+01 |
| 2   | 3-aminobenzamide      | 3.79E+01 |
| 50  | sulfadimidine         | 9.86E+01 |
| 52  | Prestwick-860         | 4.64E+01 |
| 78  | oligomycin            | 2.38E+01 |
| 80  | cloxacillin           | 1.83E+01 |



|    |                           |          |
|----|---------------------------|----------|
| 41 | allantoin                 | 5.95E+01 |
| 19 | deftropine                | 9.69E-12 |
| 90 | eucatropine               | 4.17E+00 |
| 31 | salsolidin                | 1.28E+01 |
| 90 | omeprazole                | 2.60E+00 |
| 42 | glibenclamide             | 5.59E+01 |
| 61 | oleandomycin              | 1.04E+02 |
| 27 | thiamphenicol             | 7.90E+00 |
| 45 | copper_sulfate            | 7.24E+01 |
| 90 | tropicamide               | 1.76E+00 |
| 42 | clopamide                 | 3.45E+01 |
| 25 | atracurium_besilate       | 9.36E+01 |
| 26 | thioperamide              | 6.58E+01 |
| 99 | galantamine               | 2.82E+01 |
| 31 | doxylamine                | 5.98E+00 |
| 0  | sulfamethizole            | 1.69E+01 |
| 21 | PNU-0293363               | 3.12E+01 |
| 13 | protoveratrine_A          | 1.01E+02 |
| 9  | IC-86621                  | 3.58E-01 |
| 3  | 5279552                   | 4.42E+01 |
| 89 | verteporfin               | 7.06E+01 |
| 23 | SC-19220                  | 1.09E+01 |
| 27 | dapsone                   | 3.72E+00 |
| 50 | piperacillin              | 7.72E+01 |
| 90 | fluocinonide              | 1.73E+00 |
| 52 | crotamiton                | 4.08E+01 |
| 18 | PF-01378883-00            | 7.44E+01 |
| 12 | carisoprodol              | 7.78E+01 |
| 85 | estriol                   | 1.05E+02 |
| 67 | indoprofen                | 7.41E+01 |
| 99 | mestranol                 | 1.52E+01 |
| 57 | 2-aminobenzenesulfonamide | 4.68E+00 |
| 22 | homosalate                | 6.45E+01 |
| 89 | methyldopa                | 6.01E+01 |
| 4  | monocrotaline             | 9.61E+00 |
| 69 | (+)-isoprenaline          | 4.73E+01 |
| 82 | Prestwick-1083            | 2.30E+01 |
| 54 | bacitracin                | 9.32E+01 |
| 53 | vanoxerine                | 9.79E+01 |
| 71 | mephentoin                | 1.01E+02 |
| 61 | Prestwick-559             | 1.01E+02 |
| 4  | artemisinin               | 4.36E+00 |
| 5  | topiramate                | 1.07E+02 |
| 0  | metoclopramide            | 2.18E+01 |
| 90 | cetirizine                | 2.05E+00 |
| 0  | aconitine                 | 1.59E+01 |
| 89 | dacarbazine               | 4.95E+01 |
| 0  | cytisine                  | 1.12E+01 |
| 19 | orlistat                  | 6.50E-11 |
| 77 | oxybenzone                | 1.29E+01 |
| 6  | estradiol                 | 9.01E+01 |
| 19 | dehydrocholic_acid        | 7.66E-12 |
| 90 | cortisone                 | 1.54E+00 |
| 5  | methocarbamol             | 1.07E+02 |

|     |                       |          |
|-----|-----------------------|----------|
| 3   | 5255229               | 3.51E+01 |
| 89  | phentolamine          | 3.78E+01 |
| 79  | ozagrel               | 5.74E+00 |
| 8   | oxamniquine           | 2.13E-01 |
| 14  | H-7                   | 1.33E+00 |
| 67  | ticarcillin           | 5.27E+01 |
| 49  | kanamycin             | 7.09E+01 |
| 27  | isoxicam              | 2.38E+00 |
| 48  | 5252917               | 1.27E+00 |
| 0   | tetracaine            | 1.11E+01 |
| 90  | piperidolate          | 1.34E+00 |
| 48  | DL-PPMP               | 1.67E-01 |
| 93  | griseofulvin          | 3.94E+01 |
| 69  | amiloride             | 2.85E+01 |
| 97  | tenoxicam             | 9.53E+01 |
| 40  | isotretinoin          | 1.04E+02 |
| 27  | merbromin             | 8.26E-01 |
| 5   | pivmecillinam         | 1.06E+02 |
| 73  | orciprenaline         | 9.57E+01 |
| 45  | oxamic_acid           | 3.20E+01 |
| 0   | megestrol             | 9.70E+00 |
| 58  | phenformin            | 3.01E+00 |
| 32  | rimexolone            | 8.80E+01 |
| 7   | zidovudine            | 1.07E+02 |
| 86  | rilmnidine            | 1.53E+01 |
| 90  | trazodone             | 1.30E+00 |
| 82  | flavoxate             | 1.25E+01 |
| 0   | baclofen              | 7.53E+00 |
| 37  | chenodeoxycholic_acid | 2.75E+01 |
| 32  | metyrapone            | 7.93E+01 |
| 19  | dipivefrine           | 1.12E-11 |
| 41  | Prestwick-920         | 4.78E+01 |
| 79  | asiaticoside          | 7.61E-01 |
| 101 | pentolonium           | 1.01E+02 |
| 37  | prednisolone          | 1.24E+01 |
| 88  | ketoconazole          | 7.77E+01 |
| 95  | seneciphylline        | 1.37E+01 |
| 89  | sotalol               | 3.68E+01 |
| 0   | dihydrostreptomycin   | 6.47E+00 |
| 31  | isoxsuprine           | 6.75E+00 |
| 76  | acenocoumarol         | 9.72E+01 |
| 74  | roxithromycin         | 9.02E+01 |
| 27  | isometheptene         | 3.48E-01 |
| 100 | 5666823               | 1.07E+02 |
| 42  | danazol               | 3.58E+01 |
| 29  | amikacin              | 2.11E-01 |
| 43  | ciclosporin           | 5.09E+01 |
| 59  | fludroxycortide       | 1.06E+02 |
| 90  | clobetasol            | 1.71E+00 |
| 95  | trimethadione         | 4.74E+00 |
| 72  | fluticasone           | 2.47E+00 |
| 49  | midecamycin           | 5.63E+01 |
| 100 | thiopropazine         | 1.07E+02 |
| 90  | bezafibrate           | 1.13E+00 |

|     |                       |          |
|-----|-----------------------|----------|
| 89  | ginkgolide_A          | 2.93E+01 |
| 19  | zaprinast             | 7.09E-12 |
| 13  | ramipril              | 1.03E+02 |
| 55  | kinetin               | 3.24E+01 |
| 27  | ketotifen             | 1.03E-01 |
| 0   | nizatidine            | 7.36E+00 |
| 85  | ursodeoxycholic_acid  | 1.02E+02 |
| 32  | luteolin              | 7.86E+01 |
| 77  | nitrendipine          | 2.61E+00 |
| 38  | khellin               | 1.02E+02 |
| 83  | iopromide             | 1.91E+00 |
| 101 | trimethoprim          | 8.18E+01 |
| 43  | saquinavir            | 2.82E+01 |
| 0   | dexamethasone         | 5.78E+00 |
| 66  | karakoline            | 9.32E+01 |
| 13  | methacholine_chloride | 9.95E+01 |
| 40  | ionomycin             | 1.05E+02 |
| 0   | chlorpropamide        | 3.97E+00 |
| 52  | lomefloxacin          | 6.26E+01 |
| 18  | valdecoxib            | 3.83E+01 |
| 27  | carbimazole           | 2.47E-02 |
| 24  | splitomicin           | 3.85E+01 |
| 71  | chloropyrazine        | 9.10E+01 |
| 29  | primidone             | 1.03E-01 |
| 61  | budesonide            | 1.02E+02 |
| 7   | diflunisal            | 1.07E+02 |
| 27  | isoflupredone         | 3.46E-03 |
| 89  | laudanosine           | 2.56E+01 |
| 32  | acacetin              | 7.39E+01 |
| 100 | clemastine            | 1.07E+02 |
| 74  | proxyphylline         | 8.06E+01 |
| 25  | metrifonate           | 9.14E+01 |
| 52  | dydrogesterone        | 5.18E+01 |
| 31  | pralidoxime           | 4.79E+00 |
| 19  | erythromycin          | 7.34E-12 |
| 40  | propidium_iodide      | 1.03E+02 |
| 100 | thiethylperazine      | 1.07E+02 |
| 6   | etodolac              | 9.36E+01 |
| 89  | desoxycortone         | 1.80E+01 |
| 29  | metronidazole         | 2.98E-02 |
| 0   | folic_acid            | 4.83E+00 |
| 102 | meglumine             | 1.06E+02 |
| 52  | piromidic_acid        | 3.99E+01 |
| 106 | zardaverine           | 1.01E+02 |
| 97  | (+/-)-catechin        | 8.67E+01 |
| 54  | trapidil              | 7.53E+01 |
| 11  | CP-320650-01          | 9.33E+01 |
| 17  | monastrol             | 8.67E+01 |
| 7   | melatonin             | 1.07E+02 |
| 34  | proadifen             | 1.07E+02 |
| 42  | chlorzoxazone         | 3.03E+01 |
| 82  | remoxipride           | 8.39E+00 |
| 96  | succinylsulfathiazole | 1.19E+01 |
| 19  | lobelanidine          | 1.99E-12 |

|     |                                 |          |
|-----|---------------------------------|----------|
| 61  | nisoxetine                      | 9.89E+01 |
| 14  | ellipticine                     | 1.87E+00 |
| 42  | betaxolol                       | 1.56E+01 |
| 13  | bupropion                       | 9.78E+01 |
| 0   | cefepime                        | 5.03E+00 |
| 76  | neomycin                        | 7.71E+01 |
| 70  | vinblastine                     | 3.82E+00 |
| 0   | praziquantel                    | 3.31E+00 |
| 32  | sulfaphenazole                  | 7.40E+01 |
| 88  | domperidone                     | 5.71E+01 |
| 0   | 0225151-0000                    | 2.11E+00 |
| 51  | HNMPA-(AM)3                     | 8.82E+01 |
| 99  | colistin                        | 2.50E+01 |
| 0   | etynodiol                       | 1.30E+00 |
| 53  | cephaeline                      | 8.84E+01 |
| 6   | debrisoquine                    | 8.68E+01 |
| 0   | PF-00539758-00                  | 7.70E-01 |
| 1   | 2-deoxy-D-glucose               | 5.84E+01 |
| 41  | octopamine                      | 3.91E+01 |
| 80  | mefexamide                      | 1.35E+01 |
| 32  | tiabendazole                    | 6.56E+01 |
| 16  | fusidic_acid                    | 9.76E+01 |
| 0   | Prestwick-857                   | 5.00E-01 |
| 10  | 15(S)-15-methylprostaglandin_E2 | 2.56E+01 |
| 43  | MK-886                          | 1.75E+01 |
| 34  | chlorphenamine                  | 1.07E+02 |
| 67  | sulfaquinoxaline                | 5.32E+01 |
| 6   | metformin                       | 7.37E+01 |
| 0   | cromoglicic_acid                | 3.17E-01 |
| 74  | fenspiride                      | 7.19E+01 |
| 0   | sulfabenzamide                  | 1.64E-01 |
| 46  | zomepirac                       | 7.41E+01 |
| 62  | antimycin_A                     | 1.07E+02 |
| 22  | lithocholic_acid                | 7.61E+01 |
| 106 | molindone                       | 9.21E+01 |
| 99  | arcaine                         | 1.39E+01 |
| 100 | S-propranolol                   | 1.07E+02 |
| 89  | ipratropium_bromide             | 2.17E+01 |
| 88  | procainamide                    | 2.90E+01 |
| 12  | Chicago_Sky_Blue_6B             | 7.54E+01 |
| 7   | triamcinolone                   | 1.07E+02 |
| 32  | lymecycline                     | 6.06E+01 |
| 61  | triflusal                       | 9.57E+01 |
| 3   | 5109870                         | 5.94E+01 |
| 3   | trifluridine                    | 4.02E+01 |
| 81  | epiandrosterone                 | 8.20E+01 |
| 13  | physostigmine                   | 9.63E+01 |
| 5   | convolamine                     | 1.07E+02 |
| 40  | econazole                       | 1.05E+02 |
| 39  | isopropamide_iodide             | 8.25E+01 |
| 40  | Y-27632                         | 1.02E+02 |
| 100 | proguanil                       | 1.07E+02 |
| 4   | thiamine                        | 1.85E+01 |
| 58  | flumetasone                     | 8.08E+00 |

|     |                          |          |
|-----|--------------------------|----------|
| 38  | guanadrel                | 9.23E+01 |
| 74  | phenindione              | 5.60E+01 |
| 72  | 3-acetamidocoumarin      | 2.29E+00 |
| 22  | nialamide                | 5.80E+01 |
| 29  | canadine                 | 3.30E-02 |
| 68  | carcinine                | 7.48E-01 |
| 31  | idazoxan                 | 5.11E+00 |
| 61  | tubocurarine_chloride    | 8.80E+01 |
| 52  | meropenem                | 5.10E+01 |
| 87  | lansoprazole             | 1.06E+02 |
| 100 | BW-B70C                  | 1.07E+02 |
| 98  | tretinoin                | 5.68E+00 |
| 35  | atropine_methonitrate    | 1.04E+02 |
| 31  | sulfathiazole            | 1.78E+00 |
| 32  | nifedipine               | 5.80E+01 |
| 25  | sulfacetamide            | 8.57E+01 |
| 90  | medrysone                | 2.42E+01 |
| 69  | oxedrine                 | 3.64E+01 |
| 26  | timolol                  | 6.74E+01 |
| 6   | prednisone               | 6.78E+01 |
| 0   | naphazoline              | 5.17E-01 |
| 4   | metanephrine             | 1.16E+01 |
| 32  | todralazine              | 4.75E+01 |
| 89  | hydrocotarnine           | 2.19E+01 |
| 16  | trichostatin_A           | 9.43E+01 |
| 5   | levothyroxine_sodium     | 1.07E+02 |
| 43  | equilin                  | 8.72E+00 |
| 99  | simvastatin              | 8.57E+00 |
| 6   | corticosterone           | 5.10E+01 |
| 49  | 4,5-dianilinophthalimide | 6.39E+01 |
| 60  | bambuterol               | 9.88E+01 |
| 17  | thalidomide              | 5.28E+01 |
| 100 | amoxapine                | 1.07E+02 |
| 82  | procaine                 | 5.58E+00 |
| 68  | lactobionic_acid         | 9.71E-02 |
| 32  | metacycline              | 3.93E+01 |
| 106 | zalcitabine              | 7.98E+01 |
| 90  | pipenzolate_bromide      | 2.63E+01 |
| 90  | alverine                 | 1.95E+01 |
| 73  | diltiazem                | 9.77E+01 |
| 90  | norethisterone           | 1.42E+01 |
| 60  | famotidine               | 9.01E+01 |
| 87  | ioxaglic_acid            | 1.01E+02 |
| 100 | troglitazone             | 1.07E+02 |
| 41  | niridazole               | 2.83E+01 |
| 73  | alfuzosin                | 8.13E+01 |
| 96  | minoxidil                | 3.57E+00 |
| 90  | cycloserine              | 1.14E+01 |
| 106 | meptazinol               | 5.58E+01 |
| 84  | ramifenazone             | 8.82E+01 |
| 22  | quinethazone             | 4.44E+01 |
| 5   | azathioprine             | 1.06E+02 |
| 27  | Prestwick-692            | 1.03E-02 |
| 32  | harman                   | 3.34E+01 |

|     |                       |          |
|-----|-----------------------|----------|
| 90  | meclozine             | 8.93E+00 |
| 52  | rolitetracycline      | 5.24E+01 |
| 18  | 3-nitropropionic_acid | 1.46E+01 |
| 97  | tolmetin              | 8.31E+01 |
| 104 | phenoxybenzamine      | 1.07E+02 |
| 21  | 0173570-0000          | 4.03E+01 |
| 42  | methazolamide         | 1.98E+01 |
| 0   | hemicholinium         | 1.27E+00 |
| 7   | benzydamine           | 1.07E+02 |
| 67  | gibberellic_acid      | 4.57E+01 |
| 48  | chloroquine           | 2.95E-01 |
| 90  | ifenprodil            | 7.68E+00 |
| 7   | Prestwick-1082        | 1.07E+02 |
| 90  | capsaicin             | 5.09E+00 |
| 90  | denatonium_benzoate   | 3.14E+00 |
| 74  | acetoexamide          | 5.02E+01 |
| 52  | pivampicillin         | 4.22E+01 |
| 16  | idoxuridine           | 8.92E+01 |
| 7   | 5151277               | 1.06E+02 |
| 0   | nifenazone            | 1.04E+00 |
| 52  | ioversol              | 2.92E+01 |
| 100 | promazine             | 1.07E+02 |
| 106 | etilefrine            | 3.38E+01 |
| 8   | sisomicin             | 1.06E+00 |
| 62  | mifepristone          | 1.07E+02 |
| 90  | adrenosterone         | 2.59E+00 |
| 101 | riluzole              | 7.67E+01 |
| 49  | verapamil             | 5.15E+01 |
| 0   | pregnenolone          | 7.53E-01 |
| 42  | dirithromycin         | 1.05E+01 |
| 90  | latamoxef             | 1.72E+00 |
| 49  | racecadotril          | 2.91E+01 |
| 90  | etanidazole           | 9.97E-01 |
| 4   | canrenoic_acid        | 1.15E+01 |
| 43  | pizotifen             | 3.54E+00 |
| 6   | naltrexone            | 4.91E+01 |
| 21  | cefamandole           | 1.63E+01 |
| 4   | carbamazepine         | 4.95E+00 |
| 69  | colchicine            | 2.67E+01 |
| 43  | estrone               | 4.30E-01 |
| 27  | clorsulon             | 1.68E-03 |
| 74  | nipecotic_acid        | 3.44E+01 |
| 31  | corynanthine          | 1.74E+00 |
| 85  | milrinone             | 1.04E+02 |
| 104 | semustine             | 1.07E+02 |
| 90  | anabasine             | 8.49E-01 |
| 60  | chlorphenesin         | 8.72E+01 |
| 35  | tiletamine            | 1.02E+02 |
| 100 | procarbazine          | 1.07E+02 |
| 52  | natamycin             | 2.49E+01 |
| 90  | difenidol             | 5.22E-01 |
| 0   | antazoline            | 9.17E-01 |
| 36  | gabexate              | 3.03E+00 |
| 32  | skimmianine           | 4.14E+01 |

|     |                                |          |
|-----|--------------------------------|----------|
| 73  | hesperidin                     | 6.77E+01 |
| 87  | prednicarbate                  | 9.14E+01 |
| 22  | levcycloserine                 | 3.41E+01 |
| 90  | (-)-MK-801                     | 3.39E-01 |
| 102 | (-)-atenolol                   | 1.07E+02 |
| 103 | dicloxacillin                  | 9.78E+01 |
| 40  | vinburnine                     | 1.06E+02 |
| 90  | riboflavin                     | 1.87E-01 |
| 6   | hexylcaine                     | 3.75E+01 |
| 82  | iopanoic_acid                  | 2.89E+00 |
| 3   | blebbistatin                   | 5.75E+01 |
| 0   | nicardipine                    | 7.93E-01 |
| 90  | bretylum_tosilate              | 1.04E-01 |
| 0   | quipazine                      | 4.22E-01 |
| 99  | fosfosal                       | 8.30E+00 |
| 35  | alfadolone                     | 9.19E+01 |
| 58  | fenoprofen                     | 1.44E+01 |
| 100 | lovastatin                     | 1.07E+02 |
| 61  | etamivan                       | 9.67E+01 |
| 100 | phenazopyridine                | 1.07E+02 |
| 66  | pramocaine                     | 8.40E+01 |
| 8   | ethambutol                     | 2.17E-01 |
| 0   | ergocalciferol                 | 2.89E-01 |
| 32  | flunixin                       | 3.76E+01 |
| 10  | CP-319743                      | 1.15E+01 |
| 61  | thiocolchicoside               | 8.73E+01 |
| 25  | dexpanthenol                   | 8.44E+01 |
| 90  | flunarizine                    | 9.06E-02 |
| 0   | N6-methyladenosine             | 1.69E-01 |
| 64  | aztreonam                      | 1.06E+02 |
| 61  | ceftazidime                    | 7.35E+01 |
| 19  | 16,16-dimethylprostaglandin_E2 | 9.02E-08 |
| 22  | santonin                       | 1.95E+01 |
| 71  | ciprofibrate                   | 9.45E+01 |
| 82  | scopolamine_N-oxide            | 4.54E-01 |
| 7   | cefotetan                      | 1.06E+02 |
| 20  | sulfachlorpyridazine           | 1.06E+02 |
| 13  | testosterone                   | 1.05E+02 |
| 7   | cefapirin                      | 1.05E+02 |
| 20  | 0317956-0000                   | 1.02E+02 |
| 93  | nalidixic_acid                 | 5.50E+01 |
| 15  | diclofenamide                  | 8.61E+01 |
| 46  | pridinol                       | 7.32E+01 |
| 61  | iobenguane                     | 5.89E+01 |
| 47  | bacampicillin                  | 2.30E+01 |
| 5   | azlocillin                     | 1.07E+02 |
| 44  | cobalt_chloride                | 1.29E+01 |
| 12  | meclocycline                   | 7.41E+01 |
| 31  | gemfibrozil                    | 1.06E+00 |
| 60  | gefitinib                      | 8.38E+01 |
| 32  | acetylsalicylic_acid           | 3.50E+01 |
| 31  | cefotaxime                     | 1.81E-01 |
| 35  | Prestwick-972                  | 7.73E+01 |
| 90  | ranitidine                     | 1.30E-01 |

|     |                    |          |
|-----|--------------------|----------|
| 64  | pyrantel           | 9.74E+01 |
| 13  | tomatidine         | 1.03E+02 |
| 86  | adipiodone         | 1.36E+01 |
| 76  | pirenzepine        | 7.27E+01 |
| 52  | cinchocaine        | 3.05E+01 |
| 22  | Prestwick-1100     | 8.79E+00 |
| 97  | tetroquinone       | 7.86E+01 |
| 34  | rescinnamine       | 1.07E+02 |
| 5   | bergenin           | 1.06E+02 |
| 26  | aciclovir          | 5.89E+01 |
| 85  | repaglinide        | 1.01E+02 |
| 6   | hydroxyzine        | 3.43E+01 |
| 50  | dicoumarol         | 9.73E+01 |
| 52  | progesterone       | 2.04E+01 |
| 14  | MS-275             | 1.05E+01 |
| 19  | ornidazole         | 4.98E-08 |
| 37  | niflumic_acid      | 4.93E+01 |
| 35  | metrizamide        | 5.40E+01 |
| 58  | tetryzoline        | 1.15E+01 |
| 99  | reserpine          | 4.92E+00 |
| 102 | biotin             | 1.07E+02 |
| 81  | propranolol        | 7.52E+01 |
| 61  | Trolox_C           | 4.94E+01 |
| 29  | trihexyphenidyl    | 3.44E-01 |
| 93  | ofloxacin          | 2.73E+01 |
| 53  | emetine            | 9.00E+01 |
| 41  | chloramphenicol    | 2.80E+01 |
| 93  | flutamide          | 5.83E+00 |
| 0   | alclometasone      | 7.32E-01 |
| 64  | hyoscyamine        | 7.63E+01 |
| 20  | PHA-00851261E      | 9.06E+01 |
| 90  | sulfamerazine      | 2.39E-01 |
| 55  | napelline          | 3.99E+01 |
| 78  | clofibrate         | 2.56E+01 |
| 2   | bucladesine        | 5.49E+01 |
| 0   | pirindole          | 4.60E-01 |
| 0   | demecarium_bromide | 2.16E-01 |
| 0   | benzbromarone      | 9.50E-02 |
| 40  | (+)-chelidonine    | 1.07E+02 |
| 89  | etamsylate         | 7.13E+01 |
| 61  | picotamide         | 3.55E+01 |
| 90  | cyproterone        | 1.63E-01 |
| 7   | noscapine          | 1.05E+02 |
| 104 | lomustine          | 1.07E+02 |
| 40  | nalbuphine         | 1.07E+02 |
| 4   | 5114445            | 9.05E+00 |
| 61  | propafenone        | 2.05E+01 |
| 39  | carbinoxamine      | 7.88E+01 |
| 74  | imipenem           | 3.95E+01 |
| 61  | trimetazidine      | 9.53E+00 |
| 90  | Prestwick-1084     | 1.03E-01 |
| 100 | flupentixol        | 1.07E+02 |
| 90  | liothyronine       | 4.50E-02 |
| 57  | eticlopride        | 1.11E+01 |



|     |                             |          |
|-----|-----------------------------|----------|
| 75  | rifampicin                  | 5.78E+01 |
| 100 | norcyclobenzaprine          | 1.07E+02 |
| 2   | 4-hydroxyphenazone          | 1.78E+01 |
| 6   | 5186223                     | 2.81E+01 |
| 90  | scopoletin                  | 2.26E-02 |
| 89  | terbutaline                 | 6.42E+01 |
| 0   | ascorbic_acid               | 1.12E-01 |
| 37  | bumetanide                  | 3.48E+01 |
| 40  | mianserin                   | 1.06E+02 |
| 60  | 1,5-isoquinolinediol        | 8.27E+01 |
| 61  | cyclizine                   | 4.18E+00 |
| 75  | ribavirin                   | 1.85E+01 |
| 45  | tetraethylenepentamine      | 2.88E+01 |
| 0   | chloropyramine              | 6.09E-02 |
| 87  | risperidone                 | 8.53E+01 |
| 99  | trichlormethiazide          | 2.09E+00 |
| 90  | parbendazole                | 1.49E-02 |
| 35  | enilconazole                | 3.60E+01 |
| 100 | sirolimus                   | 1.07E+02 |
| 31  | oxetacaine                  | 6.97E-02 |
| 52  | xylazine                    | 2.46E+01 |
| 72  | memantine                   | 6.67E+00 |
| 37  | dropropizine                | 1.68E+01 |
| 85  | benzylpenicillin            | 9.75E+01 |
| 29  | vigabatrin                  | 1.70E-01 |
| 100 | monensin                    | 1.07E+02 |
| 67  | Prestwick-967               | 5.70E+01 |
| 37  | telenzepine                 | 5.01E+00 |
| 25  | moxisylyte                  | 8.25E+01 |
| 100 | clozapine                   | 1.07E+02 |
| 89  | oxytetracycline             | 5.88E+01 |
| 74  | norfloxacin                 | 2.62E+01 |
| 32  | dextromethorphan            | 5.86E+01 |
| 0   | stachydrine                 | 6.04E-02 |
| 87  | spaglumic_acid              | 6.02E+01 |
| 16  | rifabutin                   | 1.01E+02 |
| 34  | dosulepin                   | 1.07E+02 |
| 4   | syrosingopine               | 6.17E+00 |
| 22  | ciclacillin                 | 5.65E+00 |
| 47  | sparteine                   | 9.36E+00 |
| 41  | etofylline                  | 1.54E+01 |
| 87  | bethanechol                 | 2.85E+01 |
| 62  | isradipine                  | 1.07E+02 |
| 100 | pimozide                    | 1.07E+02 |
| 41  | torasemide                  | 2.90E+00 |
| 7   | piroxicam                   | 1.06E+02 |
| 13  | sulfadiazine                | 1.06E+02 |
| 60  | tolfenamic_acid             | 7.44E+01 |
| 85  | etomidate                   | 8.58E+01 |
| 97  | amylocaine                  | 7.17E+01 |
| 85  | oxprenolol                  | 6.24E+01 |
| 76  | acetylsalicylsalicylic_acid | 5.13E+01 |
| 97  | furazolidone                | 4.30E+01 |
| 17  | NU-1025                     | 3.33E+01 |

|     |                        |          |
|-----|------------------------|----------|
| 67  | cefalonium             | 3.49E+01 |
| 62  | foliosidine            | 1.07E+02 |
| 34  | nicergoline            | 1.07E+02 |
| 6   | tetrahydroalstonine    | 2.38E+01 |
| 58  | sulfamethoxypyridazine | 1.34E+01 |
| 72  | decamethonium_bromide  | 1.56E+00 |
| 58  | Prestwick-685          | 4.62E+00 |
| 100 | dihydroergocristine    | 1.07E+02 |
| 46  | isoetarine             | 6.55E+01 |
| 74  | meticrane              | 1.42E+01 |
| 90  | sulconazole            | 6.29E-02 |
| 90  | fluorometholone        | 2.31E-02 |
| 12  | brompheniramine        | 6.62E+01 |
| 60  | vinpocetine            | 5.94E+01 |
| 32  | tinidazole             | 6.00E+01 |
| 89  | R-atenolol             | 5.88E+01 |
| 25  | acetazolamide          | 6.68E+01 |
| 11  | spiradoline            | 1.04E+02 |
| 40  | prilocaine             | 1.07E+02 |
| 42  | Prestwick-689          | 2.94E+01 |
| 5   | cinchonidine           | 1.07E+02 |
| 0   | sulfanilamide          | 1.68E-01 |
| 100 | raubasine              | 1.07E+02 |
| 16  | LY-294002              | 9.86E+01 |
| 21  | mephesisin             | 1.22E+01 |
| 64  | oxolinic_acid          | 5.59E+01 |
| 81  | pirenperone            | 5.61E+01 |
| 90  | pentamidine            | 1.77E-02 |
| 35  | aminocaproic_acid      | 2.08E+01 |
| 25  | triflupromazine        | 4.10E+01 |
| 52  | cefsulodin             | 3.04E+01 |
| 104 | carmustine             | 1.07E+02 |
| 100 | co-dergocrine_mesilate | 1.07E+02 |
| 85  | azaperone              | 4.19E+01 |
| 66  | betonicine             | 7.06E+01 |
| 5   | bisoprolol             | 1.07E+02 |
| 102 | naftidrofuryl          | 1.07E+02 |
| 100 | amphotericin_B         | 1.07E+02 |
| 89  | pargyline              | 5.20E+01 |
| 59  | pempidine              | 1.07E+02 |
| 39  | butirosin              | 5.85E+01 |
| 14  | daunorubicin           | 1.53E+01 |
| 80  | iproniazid             | 1.93E+01 |
| 13  | flufenamic_acid        | 1.06E+02 |
| 53  | cicloheximide          | 8.20E+01 |
| 100 | CP-645525-01           | 1.07E+02 |
| 62  | ticlopidine            | 1.07E+02 |
| 52  | bendroflumethiazide    | 2.15E+01 |
| 60  | nimesulide             | 4.72E+01 |
| 40  | betazole               | 1.07E+02 |
| 54  | esculetin              | 9.19E+01 |
| 60  | SC-58125               | 2.64E+01 |
| 32  | heliotrine             | 6.23E+01 |
| 49  | mesalazine             | 5.90E+01 |

|     |                        |          |
|-----|------------------------|----------|
| 102 | urapidil               | 1.07E+02 |
| 20  | proglumide             | 8.36E+01 |
| 34  | dihydroergotamine      | 1.07E+02 |
| 54  | Prestwick-981          | 6.14E+01 |
| 83  | clidinium_bromide      | 1.09E+01 |
| 1   | fasudil                | 8.42E+01 |
| 90  | tranylcypromine        | 3.30E-02 |
| 88  | ritodrine              | 5.09E+01 |
| 92  | bicuculline            | 1.07E+02 |
| 50  | ethoxyquin             | 9.70E+01 |
| 13  | scopolamine            | 1.05E+02 |
| 102 | nicotinic_acid         | 1.06E+02 |
| 32  | paroxetine             | 5.34E+01 |
| 106 | alprostadil            | 5.81E+01 |
| 16  | vorinostat             | 9.52E+01 |
| 62  | mercaptapurine         | 1.07E+02 |
| 89  | flumequine             | 4.88E+01 |
| 7   | cinnarizine            | 1.06E+02 |
| 59  | solasodine             | 1.07E+02 |
| 5   | haloperidol            | 1.07E+02 |
| 90  | hexestrol              | 2.16E-02 |
| 100 | lasalocid              | 1.07E+02 |
| 100 | cyclobenzaprine        | 1.07E+02 |
| 32  | proxymetacaine         | 4.29E+01 |
| 52  | fluorouracine          | 1.72E+01 |
| 61  | fipexide               | 7.82E+00 |
| 38  | sulfadimethoxine       | 1.02E+02 |
| 34  | aminophenazone         | 1.07E+02 |
| 7   | triprolidine           | 1.06E+02 |
| 62  | butoconazole           | 1.07E+02 |
| 89  | sitosterol             | 3.79E+01 |
| 6   | 5152487                | 2.57E+01 |
| 100 | ivermectin             | 1.07E+02 |
| 0   | propoxycaine           | 1.17E+00 |
| 20  | indapamide             | 5.60E+01 |
| 62  | clioquinol             | 1.07E+02 |
| 40  | lynestrenol            | 1.07E+02 |
| 95  | moxonidine             | 5.55E+01 |
| 95  | propylthiouracil       | 2.57E+01 |
| 0   | piretanide             | 6.47E-01 |
| 49  | exemestane             | 4.18E+01 |
| 42  | clindamycin            | 2.54E+01 |
| 4   | ikarugamycin           | 9.88E+00 |
| 19  | STOCK1N-35696          | 7.01E-05 |
| 101 | clemizole              | 8.95E+01 |
| 58  | aminohippuric_acid     | 4.46E+00 |
| 3   | colforsin              | 9.96E+01 |
| 13  | demeclocycline         | 1.04E+02 |
| 92  | terconazole            | 1.07E+02 |
| 5   | minocycline            | 1.06E+02 |
| 11  | dilazep                | 1.00E+02 |
| 7   | tiratricol             | 1.05E+02 |
| 32  | 2,6-dimethylpiperidine | 4.06E+01 |
| 106 | Prestwick-983          | 3.47E+01 |

|     |                          |          |
|-----|--------------------------|----------|
| 40  | pimethixene              | 1.07E+02 |
| 85  | sulfadoxine              | 2.89E+01 |
| 13  | hydrastine_hydrochloride | 1.02E+02 |
| 100 | ursolic_acid             | 1.07E+02 |
| 90  | apramycin                | 5.01E-02 |
| 52  | esculin                  | 1.39E+01 |
| 3   | ciclopirox               | 9.27E+01 |
| 52  | ethaverine               | 5.81E+00 |
| 73  | bromocriptine            | 9.26E+01 |
| 60  | wortmannin               | 2.21E+01 |
| 97  | paromomycin              | 3.70E+01 |
| 3   | resveratrol              | 7.91E+01 |
| 73  | methylethergometrine     | 7.03E+01 |
| 92  | vitexin                  | 1.07E+02 |
| 100 | imipramine               | 1.07E+02 |
| 1   | sodium_phenylbutyrate    | 6.29E+01 |
| 90  | acepromazine             | 2.74E-02 |
| 7   | mecamylamine             | 1.03E+02 |
| 105 | gelsemine                | 7.33E+01 |
| 104 | C-75                     | 1.07E+02 |
| 87  | moracizine               | 1.81E+01 |
| 34  | atropine_oxide           | 1.07E+02 |
| 1   | tamoxifen                | 2.36E+01 |
| 29  | cinchonine               | 5.31E-01 |
| 0   | thiamazole               | 1.37E+00 |
| 7   | buspirone                | 9.88E+01 |
| 32  | etidronic_acid           | 3.76E+01 |
| 7   | amrinone                 | 9.00E+01 |
| 5   | cefazolin                | 1.06E+02 |
| 62  | erastin                  | 1.07E+02 |
| 81  | serotonin                | 3.16E+01 |
| 37  | enalapril                | 5.74E+00 |
| 59  | alcuronium_chloride      | 1.07E+02 |
| 100 | thioridazine             | 1.07E+02 |
| 100 | amitriptyline            | 1.07E+02 |
| 54  | halofantrine             | 3.24E+01 |
| 32  | trioxysalen              | 2.66E+01 |
| 12  | SR-95639A                | 5.85E+01 |
| 100 | clofilium_tosylate       | 1.07E+02 |
| 102 | flurbiprofen             | 1.06E+02 |
| 89  | sanguinarine             | 4.82E+01 |
| 88  | clenbuterol              | 2.64E+01 |
| 22  | phenelzine               | 6.53E+00 |
| 0   | glimepiride              | 1.26E+00 |
| 102 | rolipram                 | 1.04E+02 |
| 5   | noretynodrel             | 1.05E+02 |
| 62  | miconazole               | 1.07E+02 |
| 84  | nadide                   | 1.01E+02 |
| 59  | citolone                 | 1.05E+02 |
| 38  | atractyloside            | 9.62E+01 |
| 71  | ondansetron              | 1.03E+02 |
| 32  | Prestwick-665            | 1.88E+01 |
| 26  | lisuride                 | 7.03E+01 |
| 62  | naftifine                | 1.07E+02 |

|     |                                  |          |
|-----|----------------------------------|----------|
| 6   | diphepanil_metilsulfate          | 2.59E+01 |
| 42  | chlorhexidine                    | 1.84E+01 |
| 60  | amodiaquine                      | 1.32E+01 |
| 7   | ricinine                         | 8.55E+01 |
| 40  | PF-00875133-00                   | 1.07E+02 |
| 6   | calycanthine                     | 9.72E+00 |
| 62  | LM-1685                          | 1.07E+02 |
| 39  | drofenine                        | 3.67E+01 |
| 5   | AG-028671                        | 1.04E+02 |
| 63  | digitoxigenin                    | 1.07E+02 |
| 62  | clotrimazole                     | 1.07E+02 |
| 38  | glycopyrronium_bromide           | 7.29E+01 |
| 84  | leflunomide                      | 8.14E+01 |
| 49  | troleandomycin                   | 3.31E+01 |
| 67  | mephentermine                    | 4.44E+01 |
| 34  | isoconazole                      | 1.07E+02 |
| 0   | ampicillin                       | 1.59E+00 |
| 95  | tiaprofenic_acid                 | 1.37E+01 |
| 40  | cyproheptadine                   | 1.07E+02 |
| 62  | azacyclonol                      | 1.07E+02 |
| 90  | tyloxapol                        | 1.76E-01 |
| 0   | brinzolamide                     | 7.59E-01 |
| 3   | deferroxamine                    | 8.02E+01 |
| 24  | docosahexaenoic_acid_ethyl_ester | 5.89E+01 |
| 89  | talampicillin                    | 4.72E+01 |
| 51  | butein                           | 9.80E+01 |
| 59  | flunisolide                      | 1.01E+02 |
| 97  | iodixanol                        | 1.84E+01 |
| 74  | morantel                         | 2.81E+01 |
| 89  | tolbutamide                      | 3.05E+01 |
| 103 | velnacrine                       | 9.83E+01 |
| 50  | benfotiamine                     | 9.56E+01 |
| 50  | spiramycin                       | 6.96E+01 |
| 16  | trimethobenzamide                | 1.02E+02 |
| 90  | colecalfiferol                   | 1.02E-01 |
| 35  | gliquidone                       | 1.96E+01 |
| 71  | Prestwick-1085                   | 9.62E+01 |
| 104 | F0447-0125                       | 1.07E+02 |
| 100 | tetrandrine                      | 1.07E+02 |
| 58  | 3-acetylcoumarin                 | 3.81E+00 |
| 16  | mepacrine                        | 9.49E+01 |
| 62  | rotenone                         | 1.07E+02 |
| 13  | clonidine                        | 1.05E+02 |
| 0   | nefopam                          | 7.27E-01 |
| 102 | phenylpropanolamine              | 1.03E+02 |
| 11  | alpha-ergocryptine               | 9.73E+01 |
| 40  | 1,4-chrysenequinone              | 1.07E+02 |
| 13  | gramine                          | 1.03E+02 |
| 63  | strophanthidin                   | 1.07E+02 |
| 92  | tetramisole                      | 1.07E+02 |
| 13  | DL-thiorphan                     | 9.75E+01 |
| 11  | citalopram                       | 7.40E+01 |
| 91  | sulindac                         | 4.52E+01 |
| 71  | tropine                          | 7.45E+01 |

|     |                         |          |
|-----|-------------------------|----------|
| 100 | orphenadrine            | 1.07E+02 |
| 4   | pinacidil               | 1.67E+01 |
| 7   | droperidol              | 8.79E+01 |
| 34  | penbutolol              | 1.07E+02 |
| 49  | rofecoxib               | 1.43E+01 |
| 34  | mefloquine              | 1.07E+02 |
| 104 | STOCK1N-35215           | 1.07E+02 |
| 5   | ciprofloxacin           | 1.05E+02 |
| 25  | benzonatate             | 5.80E+01 |
| 50  | flecainide              | 3.43E+01 |
| 32  | lysergol                | 3.07E+01 |
| 100 | metergoline             | 1.07E+02 |
| 34  | spiperone               | 1.06E+02 |
| 34  | prenylamine             | 1.03E+02 |
| 5   | betamethasone           | 1.02E+02 |
| 16  | bufexamac               | 8.64E+01 |
| 104 | etacrynic_acid          | 1.07E+02 |
| 104 | myricetin               | 1.07E+02 |
| 7   | diazoxide               | 7.70E+01 |
| 0   | diloxanide              | 9.84E-01 |
| 32  | cefalotin               | 1.87E+01 |
| 92  | Prestwick-642           | 1.05E+02 |
| 30  | amiprilose              | 5.85E+01 |
| 5   | 5140203                 | 9.59E+01 |
| 89  | N-acetyl-L-leucine      | 3.31E+01 |
| 46  | ebselen                 | 8.04E+01 |
| 3   | guaifenesin             | 7.97E+01 |
| 61  | oxymetazoline           | 2.36E+01 |
| 0   | terazosin               | 4.46E-01 |
| 59  | eldeline                | 9.54E+01 |
| 89  | 6-benzylaminopurine     | 1.72E+01 |
| 62  | rottlerin               | 1.07E+02 |
| 40  | piperlongumine          | 1.07E+02 |
| 100 | calmidazolium           | 1.07E+02 |
| 0   | mimosine                | 1.39E-01 |
| 100 | fluspirilene            | 1.07E+02 |
| 90  | dexpropranolol          | 5.42E-01 |
| 28  | monorden                | 1.07E+02 |
| 32  | Prestwick-664           | 1.14E+01 |
| 102 | altretamine             | 1.03E+02 |
| 3   | etoposide               | 6.03E+01 |
| 23  | NS-398                  | 6.26E+01 |
| 26  | guanabenz               | 4.81E+01 |
| 62  | valinomycin             | 1.07E+02 |
| 92  | ethionamide             | 1.00E+02 |
| 73  | fenoterol               | 7.46E+01 |
| 40  | dyclonine               | 1.07E+02 |
| 100 | perhexiline             | 1.07E+02 |
| 103 | methoxsalen             | 7.29E+01 |
| 71  | methanthelinium_bromide | 4.39E+01 |
| 104 | parthenolide            | 1.07E+02 |
| 102 | flucytosine             | 9.54E+01 |
| 7   | BAS-012416453           | 7.13E+01 |
| 25  | epirizole               | 3.10E+01 |

|     |                           |          |
|-----|---------------------------|----------|
| 55  | suxibuzone                | 5.79E+01 |
| 90  | nitrofurantoin            | 3.68E-01 |
| 12  | oxolamine                 | 4.58E+01 |
| 101 | kawain                    | 9.20E+01 |
| 40  | MG-132                    | 1.07E+02 |
| 5   | oxantel                   | 9.42E+01 |
| 100 | raloxifene                | 1.07E+02 |
| 92  | iocetamic_acid            | 8.38E+01 |
| 13  | labetalol                 | 1.02E+02 |
| 104 | 15-delta_prostaglandin_J2 | 1.06E+02 |
| 51  | dimethyloxalylglycine     | 7.60E+01 |
| 99  | trimethylcolchicinic_acid | 2.18E+01 |
| 14  | gallamine_triethiodide    | 5.52E+01 |
| 63  | proscillaridin            | 1.07E+02 |
| 3   | triamterene               | 4.20E+01 |
| 102 | hydrocortisone            | 8.27E+01 |
| 63  | bisacodyl                 | 1.07E+02 |
| 5   | quinidine                 | 8.29E+01 |
| 90  | beta-escin                | 1.81E-01 |
| 61  | mesoridazine              | 1.26E+01 |
| 53  | propofol                  | 9.48E+01 |
| 100 | albendazole               | 1.07E+02 |
| 13  | diclofenac                | 9.72E+01 |
| 102 | terguride                 | 5.63E+01 |
| 100 | metitepine                | 1.07E+02 |
| 100 | fluphenazine              | 1.07E+02 |
| 63  | digoxigenin               | 1.07E+02 |
| 42  | lobeline                  | 2.38E+01 |
| 104 | thiostrepton              | 1.05E+02 |
| 13  | tremorine                 | 8.58E+01 |
| 100 | alimemazine               | 1.07E+02 |
| 11  | CP-690334-01              | 5.45E+01 |
| 105 | diflorasone               | 6.64E+01 |
| 104 | oxyphenbutazone           | 1.01E+02 |
| 66  | isosorbide                | 7.35E+01 |
| 4   | berberine                 | 1.65E+01 |
| 32  | 0175029-0000              | 1.37E+01 |
| 102 | florfenicol               | 2.47E+01 |
| 40  | 5224221                   | 1.07E+02 |
| 100 | zuclopenthixol            | 1.07E+02 |
| 34  | nordihydroguaiaretic_acid | 1.06E+02 |
| 14  | bromopride                | 2.85E+01 |
| 34  | suloctidil                | 1.01E+02 |
| 5   | N-acetyl-L-aspartic_acid  | 7.31E+01 |
| 100 | prochlorperazine          | 1.07E+02 |
| 13  | alpha-yohimbine           | 7.17E+01 |
| 100 | clomifene                 | 1.07E+02 |
| 20  | mexiletine                | 6.50E+01 |
| 32  | amoxicillin               | 4.17E+00 |
| 62  | profenamine               | 1.07E+02 |
| 7   | 5162773                   | 7.46E+01 |
| 62  | pararosaniline            | 1.07E+02 |
| 100 | trifluoperazine           | 1.07E+02 |
| 40  | thapsigargin              | 1.07E+02 |

|     |                             |          |
|-----|-----------------------------|----------|
| 84  | cefmetazole                 | 7.28E+01 |
| 13  | papaverine                  | 4.72E+01 |
| 5   | streptomycin                | 5.03E+01 |
| 28  | tanespimycin                | 1.07E+02 |
| 101 | salbutamol                  | 6.87E+01 |
| 16  | scriptaid                   | 9.67E+01 |
| 7   | 5213008                     | 5.04E+01 |
| 6   | tacrine                     | 2.74E+01 |
| 100 | doxepin                     | 1.07E+02 |
| 0   | cefoperazone                | 2.95E+00 |
| 52  | levamisole                  | 7.26E+01 |
| 52  | bephenium_hydroxynaphthoate | 4.30E+01 |
| 100 | hexetidine                  | 1.07E+02 |
| 0   | SC-560                      | 5.52E-01 |
| 15  | STOCK1N-35874               | 1.05E+02 |
| 90  | sertaconazole               | 5.48E-01 |
| 40  | puromycin                   | 1.07E+02 |
| 38  | calcium_folate              | 7.32E+01 |
| 69  | scoulerine                  | 1.05E+02 |
| 7   | oxaprozin                   | 2.27E+01 |
| 16  | HC_toxin                    | 8.12E+01 |
| 62  | pyrvinium                   | 1.07E+02 |
| 104 | 5155877                     | 9.96E+01 |
| 34  | trimipramine                | 9.88E+01 |
| 62  | dequalinium_chloride        | 1.07E+02 |
| 15  | Gly-His-Lys                 | 8.53E+01 |
| 100 | cytochalasin_B              | 1.07E+02 |
| 59  | halcinonide                 | 9.85E+01 |
| 46  | corbadrine                  | 7.32E+01 |
| 100 | chlorpromazine              | 1.07E+02 |
| 76  | nomifensine                 | 8.22E+01 |
| 40  | MG-262                      | 1.06E+02 |
| 100 | tonzonium_bromide           | 1.07E+02 |
| 28  | alvespimycin                | 1.05E+02 |
| 100 | levomepromazine             | 1.07E+02 |
| 104 | withaferin_A                | 8.66E+01 |
| 69  | mebendazole                 | 9.89E+01 |
| 67  | letrozole                   | 6.68E+01 |
| 100 | protriptyline               | 1.07E+02 |
| 100 | diperodon                   | 1.07E+02 |
| 59  | mepenzolate_bromide         | 7.16E+01 |
| 100 | nortriptyline               | 1.07E+02 |
| 100 | podophyllotoxin             | 1.07E+02 |
| 53  | anisomycin                  | 8.31E+01 |
| 40  | fendiline                   | 1.06E+02 |
| 40  | mometasone                  | 1.02E+02 |
| 60  | clomipramine                | 5.42E+01 |
| 74  | ketorolac                   | 6.19E+01 |
| 16  | pergolide                   | 5.79E+01 |
| 3   | quercetin                   | 5.24E+01 |
| 85  | delsoline                   | 7.41E+01 |
| 92  | beclometasone               | 8.03E+01 |
| 100 | maprotiline                 | 1.07E+02 |
| 100 | 0297417-0002B               | 1.07E+02 |



|     |                             |          |
|-----|-----------------------------|----------|
| 62  | 0179445-0000                | 1.07E+02 |
| 89  | menadione                   | 7.64E+01 |
| 100 | benzethonium_chloride       | 1.07E+02 |
| 100 | chlorprothixene             | 1.07E+02 |
| 62  | 5707885                     | 1.07E+02 |
| 64  | pentetrazol                 | 9.23E+01 |
| 62  | clofazimine                 | 1.07E+02 |
| 89  | ketoprofen                  | 4.21E+01 |
| 63  | digoxin                     | 1.07E+02 |
| 106 | dinoprost                   | 8.44E+01 |
| 100 | bepidil                     | 1.07E+02 |
| 104 | securinine                  | 7.01E+01 |
| 73  | (-)-isoprenaline            | 8.62E+01 |
| 34  | astemizole                  | 1.00E+02 |
| 100 | cloperastine                | 1.07E+02 |
| 40  | disulfiram                  | 1.03E+02 |
| 62  | benzamil                    | 1.07E+02 |
| 63  | lycorine                    | 1.07E+02 |
| 28  | geldanamycin                | 9.72E+01 |
| 34  | terfenadine                 | 7.65E+01 |
| 100 | homochlorcyclizine          | 1.07E+02 |
| 100 | piperacetazine              | 1.07E+02 |
| 63  | hydroquinine                | 1.07E+02 |
| 100 | chlorcyclizine              | 1.07E+02 |
| 62  | felodipine                  | 1.07E+02 |
| 62  | abamectin                   | 1.06E+02 |
| 13  | atropine                    | 7.69E+01 |
| 100 | quinisocaine                | 1.07E+02 |
| 100 | desipramine                 | 1.07E+02 |
| 5   | isocarboxazid               | 8.25E+01 |
| 52  | carbachol                   | 7.90E+01 |
| 100 | perphenazine                | 1.07E+02 |
| 69  | fenbendazole                | 9.83E+01 |
| 100 | methylbenzethonium_chloride | 1.07E+02 |
| 63  | lanatoside_C                | 1.07E+02 |
| 62  | niclosamide                 | 1.06E+02 |
| 62  | gossypol                    | 9.09E+01 |
| 40  | celastrol                   | 1.06E+02 |
| 40  | loxapine                    | 9.34E+01 |
| 63  | ouabain                     | 1.07E+02 |
| 100 | alexidine                   | 1.07E+02 |
| 100 | metixene                    | 1.07E+02 |
| 100 | loperamide                  | 1.01E+02 |
| 63  | helveticoside               | 1.07E+02 |
